# Supplementary material for: Nutrient State, Aging, and Diet Modulate SAM50-Dependent Mitochondrial Remodeling and Systemic Metabolic Signatures
Source: Research Square preprint supplement (doi:10.21203/rs.3.rs-8704245/v1), 2026-02-16
Supplement: Supplementary file 1 [file 4329f722da19cced34abe9d8.xlsx]

## Sheet: LabWAS_EuropeanAncestry
Supplemental File 2: LabWAS results for SAMM50 GREX in BioVU individuals of European ancestry
Laboratory Name	Laboratory Label	Laboratory Group	p-value	n_samples	Bonferroni Significant
ACHRBd	ACHRBd	other	0.00117868	214	FALSE
Complement C4 [Mass/volume] in Serum or Plasma	C4Quan	immune	0.0081257	3902	FALSE
Creatinine [Mass/volume] in Urine	SUCrea	urinary	0.0129151	8682	FALSE
Thyroglobulin [Mass/volume] in Serum or Plasma	Thyrgb	endocrine	0.0134058	1059	FALSE
Unidentified cells/100 leukocytes in Body fluid	FLgOth	blood	0.0265054	882	FALSE
Unidentified cells/100 leukocytes in Body fluid	CLgOth	immune	0.027658	827	FALSE
Cholesterol in LDL [Mass/volume] in Serum or Plasma by calculation	LDLCho	metabolic	0.030314	645	FALSE
Leukocytes [#/volume] in Blood by Automated count	WBC	immune	0.0313822	68687	FALSE
Penicillin G [Susceptibility] by Minimum inhibitory concentration (MIC)	PenG	immune	0.0321258	223	FALSE
Urobilinogen [Units/volume] in Urine by Test strip	UrobUr	urinary	0.033314	4347	FALSE
Coagulation factor VII activity actual/normal in Platelet poor plasma by Coagulation assay	F7Act	blood	0.0351554	104	FALSE
QRS duration	QRS.DURATION	cardiovascular	0.0368693	7482	FALSE
PSA serum/plasma	PSA	cancer	0.0410688	8336	FALSE
Monocytes/100 leukocytes in Blood by Manual count	MONOM	immune	0.042119	10903	FALSE
Platelets reticulated/100 platelets in Blood by Automated count	IPF	blood	0.0478383	4921	FALSE
Ketones [Mass/volume] in Urine by Test strip	UKeto	urinary	0.0508788	6265	FALSE
Granular casts [#/area] in Urine sediment by Microscopy high power field	UGrCst	urinary	0.0517434	1108	FALSE
Eosinophils/100 leukocytes in Cerebral spinal fluid by Manual count	CEosin	blood	0.0547803	1050	FALSE
Carboxyhemoglobin % in blood	CoHgb	toxicology/pharmacology	0.0580691	6905	FALSE
Tyrosine [Moles/volume] in Serum or Plasma	Tyrosn	metabolic	0.0582551	406	FALSE
Hematocrit	HCTWB	blood	0.0637434	13193	FALSE
Creatine kinase [Enzymatic activity/volume] in Serum or Plasma	CPKTot	cardiovascular	0.0696054	8158	FALSE
Calcitriol [Mass/volume] in Serum or Plasma	D25OHT	metabolic	0.0721544	19704	FALSE
Cobalamin (Vitamin B12) [Mass/volume] in Serum or Plasma	Vi.B12	metabolic	0.0724977	20957	FALSE
Fibrinogen [Mass/volume] in Platelet poor plasma by Coagulation assay	Fbrngn	blood	0.0800513	6213	FALSE
NtAbs	NtAbs	immune	0.0826204	27036	FALSE
RDW SD	RDW.SD	blood	0.0841473	333	FALSE
Complement C1 esterase inhibitor [Mass/volume] in Serum or Plasma	C1Elh	immune	0.0885873	164	FALSE
Sodium [Moles/volume] in Urine	SU.Na	urinary	0.0895803	2764	FALSE
Erythrocytes [#/volume] in Blood by Automated count	FRBC1	blood	0.0925317	1873	FALSE
Mononuclear cells/100 leukocytes in Synovial fluid by Manual count	SyMnCl	immune	0.098127	978	FALSE
Vancomycin [Mass/volume] in Serum or Plasma	VancTr	toxicology/pharmacology	0.100971	793	FALSE
Alpha 1 antitrypsin [Mass/volume] in Serum or Plasma	A1Anti	other	0.10439	1839	FALSE
Chromogranin A [Mass/volume] in Serum or Plasma	ChromA	cancer	0.121968	461	FALSE
Vancomycin [Susceptibility] by Minimum inhibitory concentration (MIC)	Vancomy	toxicology/pharmacology	0.122809	1705	FALSE
Fructosamine [Moles/volume] in Serum or Plasma	Fructo	metabolic	0.123915	544	FALSE
Ferritin [Mass/volume] in Serum or Plasma	Ferrit	blood	0.127854	17386	FALSE
IgG subclass 2 [Mass/volume] in Serum	G.Sub2	immune	0.127904	336	FALSE
Lutropin [Units/volume] in Serum or Plasma	LH1	endocrine	0.130721	2292	FALSE
Reticulocytes/100 erythrocytes in Blood by Automated count	RetiCt	blood	0.132532	7553	FALSE
Tacrolimus [Mass/volume] in Blood	FK.506	liver	0.133215	1638	FALSE
Phenylalanine [Moles/volume] in Serum or Plasma	Phnyln	metabolic	0.137259	407	FALSE
Alpha 1 antitrypsin [Mass/volume] in Serum or Plasma	A.1.A	other	0.138326	853	FALSE
Testosterone Free/Testosterone.total in Serum or Plasma	Test_percent_F	endocrine	0.143833	390	FALSE
PLATELET	PLATELET	blood	0.144071	331	FALSE
Polymorphonuclear cells/100 leukocytes in Body fluid by Manual count	NEUTM	immune	0.145737	10986	FALSE
Volume in Urine collected for unspecified duration	TotVl	toxicology/pharmacology	0.153513	5354	FALSE
Estriol (E3).unconjugated [Mass/volume] in Serum or Plasma	EstUn	endocrine	0.1539	612	FALSE
Troponin I.cardiac [Mass/volume] in Serum or Plasma	TRPI	cardiovascular	0.154573	11307	FALSE
Total Bilirubin serum/plasma	TBil	metabolic	0.15625	60126	FALSE
Leucine [Moles/volume] in Serum or Plasma	Leucne	metabolic	0.162334	407	FALSE
Schd	Schd	toxicology/pharmacology	0.164334	4563	FALSE
RRISK	RRISK	other	0.168455	263	FALSE
Cholesterol non HDL [Mass/volume] in Serum or Plasma	NonHDL	metabolic	0.169341	3537	FALSE
Asparagine [Moles/volume] in Serum or Plasma	Asprgn	metabolic	0.177981	404	FALSE
Beta-2-Microglobulin [Mass/volume] in Serum or Plasma	B2Mcg	immune	0.178336	409	FALSE
Prealbumin [Mass/volume] in Serum or Plasma	Pralbu	metabolic	0.191621	6975	FALSE
Nucleated erythrocytes [#/volume] in Blood by Automated count	NRBCMA	blood	0.192622	1952	FALSE
Serine [Moles/volume] in Serum or Plasma	Serine	metabolic	0.193444	405	FALSE
IMMATURE_GRANULOCYTES	IMMATURE_GRANULOCYTES	immune	0.197028	978	FALSE
25-Hydroxycalciferol [Mass/volume] in Serum or Plasma	X25HyD2	metabolic	0.198928	3100	FALSE
RDW CV	RDW.CV	blood	0.202627	332	FALSE
ProtUr	ProtUr	urinary	0.205421	117	FALSE
Erythrocytes [#/volume] in Blood by Automated count	RBC	blood	0.205483	3040	FALSE
Potassium [Moles/volume] in Urine	SU.K	urinary	0.205552	520	FALSE
DNA double strand Ab [Units/volume] in Serum	AntDNA	immune	0.209041	2438	FALSE
FRONTAL AXIS TERMINAL 40 MS	FRONTAL.AXIS.TERMINAL.40.MS	cardiovascular	0.214288	7463	FALSE
Blasts/100 leukocytes in Blood by Manual count	Blasts	blood	0.221597	1682	FALSE
Cancer Ag 27-29 [Units/volume] in Serum or Plasma	CA2729	cancer	0.224299	157	FALSE
IgG subclass 3 [Mass/volume] in Serum	G.Sub3	immune	0.226684	336	FALSE
Albumin [Mass/volume] in Body fluid	F.ALB	liver	0.228362	447	FALSE
Testosterone Free [Mass/volume] in Serum or Plasma	TstFAM	cancer	0.232543	413	FALSE
Eosinophils [#/volume] in Blood by Automated count	EOSIAB	immune	0.237263	32012	FALSE
Urea nitrogen [Mass/volume] in Urine	SU.Ure	urinary	0.23756	2739	FALSE
WHITE BLOOD CELLS	WHITE.BLOOD.CELLS	immune	0.241964	331	FALSE
Gamma interferon background [Units/volume] in Blood by Immunoassay	QtfNIL	immune	0.242647	2231	FALSE
Maximum clot firmness [Length] in Blood by Thromboelastography	MXAMP	other	0.244228	760	FALSE
Hydroxyproline [Moles/volume] in Serum or Plasma	OHPrln	metabolic	0.244543	402	FALSE
Complement C3 [Mass/volume] in Serum or Plasma	C3	immune	0.246923	3905	FALSE
Proline [Moles/volume] in Serum or Plasma	Prolne	metabolic	0.25126	405	FALSE
Cholesterol [Mass/volume] in Serum or Plasma	Chol	metabolic	0.255982	32647	FALSE
Collection duration of Unspecified specimen	HrColl	urinary	0.262711	1692	FALSE
Malignant cells/100 cells in Body fluid by Manual count	FMALN	cancer	0.264298	285	FALSE
Glucose [Mass/volume] in Serum or Plasma --2 hours post 100 g glucose PO	GTT2Hr	metabolic	0.266173	821	FALSE
PSA serum/plasma	PSARfx	cancer	0.26713	198	FALSE
Hm	Hm	other	0.269448	3075	FALSE
Ornithine [Moles/volume] in Serum or Plasma	Ornthn	metabolic	0.269509	417	FALSE
Lipemic index of Serum or Plasma	LipIdx	metabolic	0.276885	4849	FALSE
HEMATOCRIT	HEMATOCRIT	blood	0.277185	695	FALSE
Carbon dioxide [Partial pressure] in Arterial blood	PCO2	blood	0.278624	149	FALSE
Eosinophils %	EOSIRE	immune	0.283365	32371	FALSE
Vancomycin [Mass/volume] in Serum or Plasma	Vanco1	toxicology/pharmacology	0.284634	7845	FALSE
Protein [Mass/volume] in Urine by Test strip	UrPro	urinary	0.284851	18910	FALSE
UNBOUND_IRON_BINDING	UNBOUND_IRON_BINDING	metabolic	0.294945	166	FALSE
Parathyrin.intact [Mass/volume] in Serum or Plasma	Nt.PTH	endocrine	0.29623	7185	FALSE
Creatinine [Mass/volume] in Urine	BUN_CREATININE_RATIO	metabolic	0.304424	166	FALSE
Cells Counted Total [#] in Body fluid	FTo.Cl	blood	0.313149	3095	FALSE
Progesterone [Mass/volume] in Serum or Plasma	Prog.R	endocrine	0.319398	940	FALSE
TTcont	TTcont	other	0.324596	242	FALSE
Follitropin [Units/volume] in Serum or Plasma	FSH1	endocrine	0.328437	3767	FALSE
Creatine kinase.MB [Mass/volume] in Serum or Plasma	CKMBRe	cardiovascular	0.341957	14390	FALSE
Creatine kinase.MB/Creatine kinase.total in Serum or Plasma	MBRat	cardiovascular	0.348861	14153	FALSE
Troponin I.cardiac [Mass/volume] in Blood	WBTrpI	cardiovascular	0.351237	2012	FALSE
Cholesterol in LDL [Mass/volume] in Serum or Plasma by calculation	LDL.C	metabolic	0.351754	30549	FALSE
Iron [Mass/volume] in Serum or Plasma	Iron	blood	0.352113	16471	FALSE
Tau protein [Presence] in Body fluid	TProt	blood	0.357104	47235	FALSE
Eosinophils [#/volume] in Blood by Automated count	EOSIA	immune	0.357369	32335	FALSE
VMA	VMA	other	0.361478	273	FALSE
Carbon dioxide serum/plasma	CO2	blood	0.36551	66082	FALSE
Cholesterol in LDL [Mass/volume] in Serum or Plasma by Direct assay	DirLDL	metabolic	0.365848	5292	FALSE
Bilirubin.conjugated [Mass/volume] in Serum or Plasma	BILIRUBIN._CONJUGATED	liver	0.367756	161	FALSE
Chloride [Moles/volume] in Blood	Cl.WB	blood	0.36998	7254	FALSE
MonAbs	MonAbs	immune	0.37125	27047	FALSE
Triiodothyronine (T3) Free [Mass/volume] in Serum or Plasma	T3FRE	endocrine	0.377105	1477	FALSE
Haptoglobin [Mass/volume] in Serum or Plasma	Haptgl	blood	0.378599	2606	FALSE
Phosphate	Phos	metabolic	0.38152	18442	FALSE
Borrelia burgdorferi Ab [Units/volume] in Serum by Immunoassay	BBTAb	toxicology/pharmacology	0.390395	1045	FALSE
Q ONSET	Q.ONSET	cardiovascular	0.397425	7486	FALSE
Platelet mean volume [Entitic volume] in Blood by Automated count Platelet mean volume [Entitic volume] in Blood by Automated count	MPV	blood	0.401398	49568	FALSE
Aldosterone [Mass/volume] in Serum or Plasma	Aldo.P	endocrine	0.402317	1234	FALSE
Calcium.ionized [Mass/volume] in Blood	CaIo	metabolic	0.404523	17339	FALSE
Hemoglobin [Entitic mass] in Reticulocytes	RETHE	blood	0.408829	4850	FALSE
IgG clearance/Albumin clearance [Ratio] in Serum and CSF	G.Indx	immune	0.409967	592	FALSE
Albumin [Presence] in Urine	AlbCnc	urinary	0.414952	5704	FALSE
Immature granulocytes/100 leukocytes in Blood	IGRE	immune	0.416004	47690	FALSE
Neutrophils/100 leukocytes in Cerebral spinal fluid by Manual count	CNeut	immune	0.416479	1795	FALSE
Chloride [Moles/volume] in Sweat	ClSwtL	metabolic	0.419203	108	FALSE
Hemoglobin A1c (Glycated)	HGB_A1C	metabolic	0.421018	306	FALSE
Cancer Ag 19-9 [Units/volume] in Serum or Plasma	CA19.9	cancer	0.4212	623	FALSE
Creatinine [Mass/volume] in Blood	WBCrt	blood	0.421753	7395	FALSE
Oxygen saturation Calculated from oxygen partial pressure in Arterial blood	O2Sat	blood	0.422151	11007	FALSE
IgG [Mass/volume] in Serum or Plasma	IgG.Q	immune	0.428194	3683	FALSE
HEMOGLOBIN	HEMOGLOBIN	blood	0.442272	693	FALSE
Dimer	Dimer	blood	0.449373	1136	FALSE
SomatC	SomatC	endocrine	0.449683	955	FALSE
Anion gap serum/plasma	AN.GAP	metabolic	0.452436	65927	FALSE
Eosinophils/100 leukocytes in Blood by Automated count	EOSIM	immune	0.456227	35085	FALSE
Mononuclear cells [#/volume] in Body fluid by Manual count	FMonMc	immune	0.457383	1858	FALSE
Troponin I.cardiac [Mass/volume] in Serum or Plasma	TROPONIN_I	cardiovascular	0.457387	337	FALSE
Ammonia [Moles/volume] in Plasma	Amm	metabolic	0.458225	3273	FALSE
Plasma cells/100 leukocytes in Cerebral spinal fluid by Manual count	CPlaCl	blood	0.458273	745	FALSE
Voriconazole [Mass/volume] in Serum or Plasma	Vorcon	toxicology/pharmacology	0.458684	100	FALSE
Variant lymphocytes/100 leukocytes in Body fluid by Manual count	FATYP	blood	0.459755	1061	FALSE
Quant_TB2(-)NIL	Quant_TB2...NIL	immune	0.46514	511	FALSE
FRONTAL AXIS INITIAL 40 MS	FRONTAL.AXIS.INITIAL.40.MS	cardiovascular	0.465643	7389	FALSE
Tissue transglutaminase IgA Ab [Units/volume] in Serum by Immunoassay	TTAIgA	immune	0.467417	1673	FALSE
Helicobacter pylori Ab [Units/volume] in Serum by Immunoassay	HPylAE	immune	0.469373	614	FALSE
Beta globulin [Mass/volume] in Serum or Plasma by Electrophoresis	BGL	immune	0.482719	354	FALSE
Dehydroepiandrosterone sulfate (DHEA-S) [Mass/volume] in Serum or Plasma	DHEA.S	endocrine	0.484784	1068	FALSE
Tryptophan [Moles/volume] in Serum or Plasma	Tryphn	metabolic	0.487615	407	FALSE
Creatinine [Mass/time] in 24 hour Urine	CR.Day	kidney	0.497816	858	FALSE
lev	lev	other	0.499122	507	FALSE
Bilirubin.conjugated [Mass/volume] in Serum or Plasma	CBil	liver	0.499223	25472	FALSE
Promyelocytes/100 leukocytes in Cerebral spinal fluid by Manual count	CPmylo	immune	0.505079	754	FALSE
Leukocytes [#/volume] in Blood by Automated count	I.WBC	immune	0.505185	1047	FALSE
Blasts/100 leukocytes in Body fluid by Manual count	FBlsts	immune	0.505936	775	FALSE
Chloride [Moles/volume] in Sweat	ClSwtR	metabolic	0.509162	111	FALSE
Basophils [#/volume] in Blood	Baso	immune	0.51172	27447	FALSE
Immature reticulocytes/Reticulocytes.total in Blood	IRF	blood	0.513151	5917	FALSE
Smith extractable nuclear Ab [Units/volume] in Serum by Immunoassay	SMAb	immune	0.513658	1003	FALSE
Prolactin [Mass/volume] in Serum or Plasma	Prolac	endocrine	0.517111	2932	FALSE
Testosterone Free [Mass/volume] in Serum or Plasma	TestFr	endocrine	0.518337	1952	FALSE
Glucose [Mass/volume] in Blood	GluWB	blood	0.521299	14705	FALSE
Basophils [#/volume] in Blood by Automated count	BAbs	immune	0.523293	26531	FALSE
Natriuretic peptide B [Mass/volume] in Serum or Plasma	BNP	cardiovascular	0.530976	12329	FALSE
Erythrocytes [#/area] in Urine sediment by Microscopy high power field	URBC	urinary	0.534391	24697	FALSE
Basophils/100 leukocytes in Blood by Manual count	BASOM	immune	0.537537	8256	FALSE
C reactive protein [Mass/volume] in Serum or Plasma	CRP	immune	0.538517	21370	FALSE
Heparin unfractionated [Units/volume] in Platelet poor plasma by Chromogenic method	Hepasy	blood	0.540499	259	FALSE
CALCULATED_MEAN_GLUCOSE	CALCULATED_MEAN_GLUCOSE	metabolic	0.547946	306	FALSE
Varicella zoster virus IgM Ab [Units/volume] in Serum by Immunoassay	VZ.IgM	toxicology/pharmacology	0.548081	105	FALSE
Free PSA serum/plasma	PSA.Fr	cancer	0.551468	650	FALSE
Norepinephrine [Mass/time] in 24 hour Urine	Norep	urinary	0.557862	308	FALSE
pH of Venous blood	pH.Ven	kidney	0.558908	9056	FALSE
Protein C [Units/volume] in Platelet poor plasma by Chromogenic method	PCAct	blood	0.561835	999	FALSE
QRS axis	HORIZONTAL.AXIS..INITIAL.40.MS	cardiovascular	0.563023	7347	FALSE
Angiotensin converting enzyme [Enzymatic activity/volume] in Serum or Plasma	AngioC	cardiovascular	0.56846	797	FALSE
Folate [Mass/volume] in Red Blood Cells	RBCFol	metabolic	0.568762	4805	FALSE
56+16%	X56.16.	other	0.575284	1106	FALSE
Leukocytes [#/area] in Urine sediment by Microscopy high power field	UWBC	urinary	0.582736	26160	FALSE
ProTim	ProTim	blood	0.583861	244	FALSE
Cardiolipin IgM Ab [Units/volume] in Serum by Immunoassay	ACAIgM	immune	0.585349	2299	FALSE
Neutrophils [#/volume] in Blood	Neut	immune	0.58634	28392	FALSE
Glucose [Mass/volume] in Blood	NURSING_WHOLE_BLOOD_GLUCOSE	ob/gyn	0.590396	354	FALSE
IgE [Mass/volume] in Serum	IgEQnt	immune	0.590779	1845	FALSE
Basophils/100 leukocytes in Blood by Automated count	BASORE	immune	0.592099	49449	FALSE
Calcitriol [Mass/volume] in Serum or Plasma	VD25	metabolic	0.592665	3511	FALSE
CPK	CPK	cardiovascular	0.597842	18109	FALSE
Gest	Gest	ob/gyn	0.606667	720	FALSE
Specific gravity of Urine by Test strip	USpGr	urinary	0.610345	43362	FALSE
Theophylline [Mass/volume] in Serum or Plasma	Theo	toxicology/pharmacology	0.615877	125	FALSE
Erythrocyte sedimentation rate by Westergren method	SedRat	blood	0.616	11311	FALSE
Glutamate [Moles/volume] in Serum or Plasma	GlutAc	metabolic	0.623547	416	FALSE
sz	sz	other	0.626272	490	FALSE
Blasts/100 leukocytes in Cerebral spinal fluid by Manual count	CBlsts	blood	0.626818	756	FALSE
Monocytes [#/volume] in Blood by Manual count	Monocy	immune	0.628108	28144	FALSE
Hemoglobin A1c (Glycated)	POCA1C	blood	0.633257	3541	FALSE
Beta+gamma tocopherol [Mass/volume] in Serum or Plasma	VitEGm	metabolic	0.636687	961	FALSE
Glucose urine dipstick	UGluc	urinary	0.637108	4578	FALSE
ST segment axis.horizontal plane	FRONTAL.AXIS.ST	cardiovascular	0.637928	7474	FALSE
Eos	Eos	immune	0.638993	27803	FALSE
Nucleated erythrocytes/100 leukocytes [Ratio] in Cerebral spinal fluid by Manual count	NRBCBC	blood	0.640418	2621	FALSE
Coagulation factor VIII activity actual/normal in Platelet poor plasma by Coagulation assay	F8Act	blood	0.658	948	FALSE
Eosinophils/100 leukocytes in Body fluid by Manual count	FEosin	immune	0.65893	1669	FALSE
Folate [Mass/volume] in Serum or Plasma	SerFol	metabolic	0.659253	6415	FALSE
MONOCYTE PERCENT	MONOCYTE.PERCENT	immune	0.661932	332	FALSE
Valproate serum/plasma	Depaka	toxicology/pharmacology	0.663434	978	FALSE
INTERNATIONAL NORMALIZATION RATIO	INTERNATIONAL.NORMALIZATION.RATIO	blood	0.670188	580	FALSE
Lysine [Moles/volume] in Serum or Plasma	Lysine	metabolic	0.670834	405	FALSE
Protein [Mass/volume] in Cerebral spinal fluid	CProt1	metabolic	0.67685	3009	FALSE
PP interval mean	PR.INTERVAL	cardiovascular	0.678406	7227	FALSE
Lymphocytes/100 leukocytes in Blood by Automated count	LYMPRE	immune	0.679516	49425	FALSE
Insulin-like growth factor-I [Z-score] in Serum or Plasma	IGF_1_Z.score	metabolic	0.67988	147	FALSE
Calcitriol [Mass/volume] in Serum or Plasma	X125DHy	metabolic	0.681786	2866	FALSE
Alpha-1-fetoprotein.tumor marker [Mass/volume] in Serum or Plasma	AFPTum	cancer	0.681955	2894	FALSE
Osmolality of Serum or Plasma	Osmol	blood	0.683406	1931	FALSE
Isomaltase [Enzymatic activity/mass] in Tissue	MaltsT	metabolic	0.687718	359	FALSE
Icteric index of Serum or Plasma	IctIdx	metabolic	0.688084	4841	FALSE
LEUKOREDUCED_RANDOM_PLATELETS	LEUKOREDUCED_RANDOM_PLATELETS	immune	0.693232	2291	FALSE
BASOPHIL PERCENT	BASOPHIL.PERCENT	immune	0.693911	331	FALSE
Myelocytes/100 leukocytes in Blood by Manual count	Myelo	immune	0.700585	7864	FALSE
HCVQNT	HCVQNT	immune	0.701657	648	FALSE
LYMPHOCYTE PERCENT	LYMPHOCYTE.PERCENT	immune	0.71014	332	FALSE
Nucleated_Red_Blood_Cells_%	Nucleated_Red_Blood_Cells__percent_	blood	0.71376	51	FALSE
Microalbumin/Creatinine [Mass Ratio] in 24 hour Urine	AlbCre	liver	0.714465	3181	FALSE
Erythrocyte distribution width [Ratio] by Automated count Erythrocyte distribution width [Ratio] by Automated count	RDW	blood	0.716762	68724	FALSE
Protein serum/plasma	TProSe	metabolic	0.72011	34283	FALSE
Oxygen saturation Calculated from oxygen partial pressure in Venous blood	O2SatV	blood	0.720905	8003	FALSE
Cortisol [Mass/volume] in Serum or Plasma	Cort.S	endocrine	0.721204	6811	FALSE
Sucrase [Enzymatic activity/mass] in Tissue	ScrasT	metabolic	0.721271	359	FALSE
Lipoprotein a [Mass/volume] in Serum or Plasma	R.LPA	metabolic	0.730269	346	FALSE
Hemoglobin A2/Hemoglobin.total in Blood	HPLCA2	blood	0.733607	681	FALSE
Hemoglobin A1c (Glycated) Hemoglobin A1c (Glycated)	HgbA1C	metabolic	0.733826	23162	FALSE
T wave axis.horizontal plane Reference beat	T.HORIZONTAL.AXIS	cardiovascular	0.73924	7369	FALSE
T wave axis	T.WAVE.AXIS	cardiovascular	0.740757	7476	FALSE
QRS axis.horizontal plane Reference beat	QRS.HORIZONTAL.AXIS	cardiovascular	0.74267	7352	FALSE
Urate [Mass/volume] in Serum or Plasma	UricA	urinary	0.743246	10568	FALSE
Hepatitis B virus surface Ab [Presence] in Serum	HBSA.	liver	0.745471	2375	FALSE
Ethanol [Mass/volume] in Serum or Plasma	ETOH	toxicology/pharmacology	0.745617	537	FALSE
25-Hydroxyvitamin D2+25-Hydroxyvitamin D3 [Mass/volume] in Serum or Plasma	X25DTot	metabolic	0.747796	10303	FALSE
Cholesterol.total/Cholesterol in HDL [Molar ratio] in Serum or Plasma	TC.HDL	metabolic	0.748934	3993	FALSE
Cardiolipin IgA Ab [Units/volume] in Serum by Immunoassay	ACAIgA	immune	0.75471	2028	FALSE
RePRA	RePRA	toxicology/pharmacology	0.758591	507	FALSE
Cholesterol in HDL [Mass/volume] in Serum or Plasma	HDL.C	metabolic	0.760592	31703	FALSE
pH of Arterial blood	pH	kidney	0.761505	18070	FALSE
Corticotropin [Mass/volume] in Plasma	ACTH	endocrine	0.762947	1600	FALSE
CD3+CD4+ (T4 helper) cells/100 cells in Blood	CD4_percent_	immune	0.765601	1736	FALSE
MCV [Entitic volume] by Automated count	MCV	blood	0.765804	68696	FALSE
Magnesium [Mass/volume] in Serum or Plasma	Mg	metabolic	0.768176	22083	FALSE
Creatinine [Mass/volume] in Urine	Creat1	kidney	0.772456	770	FALSE
Glucose lab	Gluc	metabolic	0.772753	66124	FALSE
P wave axis horizontal plane Reference beat	P.HORIZONTAL.AXIS	cardiovascular	0.772848	6960	FALSE
P-S-Ac	P.S.Ac	blood	0.774202	974	FALSE
Lymphocytes/100 leukocytes in Blood by Manual count	LYMPM	immune	0.774461	11282	FALSE
GTT50g	GTT50g	metabolic	0.776071	2510	FALSE
Thyroxine (T4) free [Mass/volume] in Serum or Plasma	FT4	endocrine	0.78865	28148	FALSE
Retinol [Mass/volume] in Serum or Plasma	ViARet	metabolic	0.790459	2135	FALSE
Calcium serum/plasma serum/plasma	Ca	metabolic	0.791305	65908	FALSE
Neutrophils/100 leukocytes in Blood by Automated count	NEUTRE	immune	0.792867	49526	FALSE
MCH [Entitic mass] by Automated count	MCH	blood	0.793537	68721	FALSE
MCHC [Mass/volume] by Automated count	MCHC	blood	0.794155	57734	FALSE
SGPT_ALT	SGPT_ALT	metabolic	0.794175	239	FALSE
Pyridoxine [Mass/volume] in Serum or Plasma	VitaB6	metabolic	0.794473	1898	FALSE
EoAbs	EoAbs	immune	0.799319	26530	FALSE
25_Hydroxy	Vitamin_D.25_Hydroxy	metabolic	0.799794	81	FALSE
VWFAg	VWFAg	other	0.80063	291	FALSE
P wave axis	FRONTAL.AXIS.P	cardiovascular	0.801374	7102	FALSE
Basophils/100 leukocytes in Body fluid by Manual count	FBaso	immune	0.805479	1072	FALSE
pH of Urine by Test strip	UpH	urinary	0.807779	43473	FALSE
HpBDNA	HpBDNA	liver	0.808069	68	FALSE
Monocytes/100 leukocytes in Blood by Automated count	MONORE	immune	0.80931	49497	FALSE
IgM [Mass/volume] in Serum or Plasma	IgM.Q	immune	0.812007	2227	FALSE
IMMATURE GRANULOCYTES PERCENT	IMMATURE.GRANULOCYTES.PERCENT	immune	0.818829	310	FALSE
Creatinine [Mass/volume] in Blood Creatinine [Mass/volume] in Blood	Creat	kidney	0.820559	66724	FALSE
Commen	Commen	other	0.821973	391	FALSE
Glucose [Mass/volume] in Blood by Automated test strip	GluBed	metabolic	0.823581	26952	FALSE
HIV-hi	HIV.hi	immune	0.830117	146	FALSE
Trans-3-Hydroxycotinine [Mass/volume] in Serum or Plasma	X3OHCot	toxicology/pharmacology	0.836014	370	FALSE
Basophils [#/volume] in Blood by Manual count	BASO.	immune	0.838351	65	FALSE
Lactate [Moles/volume] in Serum or Plasma	LA	metabolic	0.843402	10408	FALSE
Leukocytes [#/volume] in Blood by Automated count	LucAbs	blood	0.845696	3739	FALSE
Gentamicin [Mass/volume] in Serum or Plasma	Genta	toxicology/pharmacology	0.846542	735	FALSE
PSA-To	PSA.To	cancer	0.851652	257	FALSE
Protein C inhibitor [Mass/volume] in Platelet poor plasma by Immunoassay	Leiden	blood	0.853422	944	FALSE
Carbamazepine serum/plasma	Tegret	toxicology/pharmacology	0.858943	360	FALSE
Nornicotine [Mass/volume] in Urine	Nornic	urinary	0.862097	289	FALSE
Lymphocytes [#/volume] in Blood	Lym	immune	0.862771	28156	FALSE
Transferrin [Mass/volume] in Serum or Plasma	Trnsfr	metabolic	0.864621	1922	FALSE
SA-Vol	SA.Vol	other	0.864807	68	FALSE
Troponin T.cardiac [Mass/volume] in Serum or Plasma	TropnT	cardiovascular	0.897379	1433	FALSE
P wave Atrium by EKG	ATRIAL.RATE	cardiovascular	0.897535	7494	FALSE
Monocytes+Macrophages/100 leukocytes in Cerebral spinal fluid by Manual count	CMonMc	immune	0.900468	2208	FALSE
Creatinine [Mass/volume] in 24 hour Urine	SU.Cre	endocrine	0.903969	1610	FALSE
TCIcdt	TCIcdt	immune	0.908767	432	FALSE
Clot angle in Blood by Thromboelastography	ANGL	blood	0.910482	760	FALSE
TstPBy	TstPBy	endocrine	0.91135	15056	FALSE
Amylase [Enzymatic activity/volume] in Serum or Plasma	Amyl	metabolic	0.911893	8736	FALSE
Urea nitrogen serum/plasma	BUN	metabolic	0.918434	66183	FALSE
Phenytoin serum/plasma	Ptn	toxicology/pharmacology	0.921809	707	FALSE
INR	PT.inr	blood	0.923981	37116	FALSE
Thyroxine (T4) [Mass/volume] in Serum or Plasma	TT4	endocrine	0.925022	4318	FALSE
Metanephrine/Creatinine [Mass Ratio] in 24 hour Urine	N.M_Cr	urinary	0.931081	393	FALSE
Creatinine [Mass/time] in 24 hour Urine	Cr24Hr	kidney	0.935765	1486	FALSE
Sirolimus [Mass/volume] in Blood	Sirol	toxicology/pharmacology	0.937117	286	FALSE
Basophils/100 leukocytes in Cerebral spinal fluid by Manual count	CBaso	immune	0.9373	876	FALSE
sn	sn	other	0.942039	2586	FALSE
Triglyceride [Mass/volume] in Serum or Plasma	Trigs	metabolic	0.942999	32852	FALSE
SCL-70 extractable nuclear Ab [Units/volume] in Serum by Immunoassay	SclAb	immune	0.948521	1109	FALSE
Complement C3 [Mass/volume] in Serum or Plasma	CH50	immune	0.949305	600	FALSE
Calcidiol [Mass/volume] in Serum or Plasma	X25HyD3	metabolic	0.949506	10329	FALSE
Estrogen [Mass/volume] in Serum or Plasma by calculation	Estrog	endocrine	0.950652	154	FALSE
DHUD	DHUD	metabolic	0.955712	747	FALSE
IMMATURE GRANULOCYTES ABSOLUTE COUNT	IMMATURE.GRANULOCYTES.ABSOLUTE.COUNT	immune	0.957276	310	FALSE
dRVVT actual/normal (normalized LA screen)	RVVT	immune	0.959331	1992	FALSE
Estrone (E1) [Mass/volume] in Serum or Plasma	Estron	endocrine	0.967499	219	FALSE
Erythrocyte distribution width [Entitic volume] by Automated count	RDWSD	blood	0.970428	61257	FALSE
IgA [Mass/volume] in Serum or Plasma	IgA	immune	0.973821	8148	FALSE
Normetanephrine [Mass/time] in 24 hour Urine	NormeU	urinary	0.974684	405	FALSE
aPTT in Platelet poor plasma by Coagulation assay	PTTCtr	blood	0.976577	20321	FALSE
ClSwt	ClSwt	metabolic	0.978572	395	FALSE
Glucose [Mass/volume] in Serum or Plasma --3 hours post 100 g glucose PO	GTT3Hr	metabolic	0.981946	650	FALSE
Plasma cells/100 leukocytes in Body fluid	FPlaCl	blood	0.982107	780	FALSE
QRS axis	HORIZONTAL.AXIS..TERMINAL.40.MS	cardiovascular	0.986366	7256	FALSE
Bicarbonate [Moles/volume] in Unspecified specimen	HCO3Ca	metabolic	0.99514	17733	FALSE
Lymphocytes [#/volume] in Blood by Automated count	LymAbs	immune	0.996127	27051	FALSE
56+16#	X56.16_percent_	immune	0.99829	1181	FALSE
