# Supplementary material for: Nutrient State, Aging, and Diet Modulate SAM50-Dependent Mitochondrial Remodeling and Systemic Metabolic Signatures
Source: Research Square preprint supplement (doi:10.21203/rs.3.rs-8704245/v1), 2026-02-16
Supplement: Supplementary file 2 [file 8a1eac7e56227e56d91fe9c7.xlsx]

## Sheet: PheWAS_EuropeanAncestry
Supplemental File 1: PheWAS results for SAMM50 GREX in BioVU individuals of European ancestry
Phenotype Description	Phenotype Group	Phenotype Code (Phecode)	p-value	n_cases	n_samples	Bonferroni Significant
Other chronic nonalcoholic liver disease	digestive	571.5	2.21786e-33	4060	60690	TRUE
Chronic liver disease and cirrhosis	digestive	571	1.21105e-30	4324	60954	TRUE
Cirrhosis of liver without mention of alcohol	digestive	571.51	8.82494e-30	2062	58692	TRUE
Liver abscess and sequelae of chronic liver disease	digestive	571.8	5.7929e-16	1522	58152	TRUE
Portal hypertension	digestive	571.81	1.05079e-10	1033	57663	TRUE
Alcoholic liver damage	mental disorders	317.11	6.1144e-09	526	55132	TRUE
Liver replaced by transplant	digestive	573.2	8.35821e-09	661	57291	TRUE
Acute gastritis	digestive	535.1	3.83908e-06	84	60775	TRUE
Esophageal bleeding (varices/hemorrhage)	digestive	530.2	1.19982e-05	798	45117	TRUE
Disorders of the orbit	sense organs	376	1.54335e-05	58	61246	TRUE
Other complications of the puerperium NEC	pregnancy complications	674	8.12211e-05	55	70005	FALSE
Ascites (non malignant)	digestive	572	0.000171889	2457	59087	FALSE
Thrombotic microangiopathy	circulatory system	446.8	0.000182753	30	58129	FALSE
Hyperaldosteronism	endocrine/metabolic	255.12	0.00018427	53	60893	FALSE
Nephrotic syndrome without mention of glomerulonephritis	genitourinary	580.2	0.000208748	245	53394	FALSE
Gingivitis	digestive	523.1	0.000919529	546	65242	FALSE
Tuberculosis	infectious diseases	010	0.0013444	75	58778	FALSE
Abscess or ulceration of vulva	genitourinary	614.54	0.00135061	62	66136	FALSE
Fracture of unspecified bones	injuries & poisonings	809	0.00146335	2560	60616	FALSE
Malignant neoplasm of liver, primary	neoplasms	155.1	0.00191835	481	62261	FALSE
Acquired deformities of finger	musculoskeletal	736.2	0.00225583	106	61482	FALSE
Gonococcal infections	infectious diseases	090.2	0.0029575	42	69996	FALSE
Osteochondropathies	musculoskeletal	732	0.00297078	177	57896	FALSE
Complications of transplants and reattached limbs	injuries & poisonings	851	0.00305147	508	60879	FALSE
Extrinsic allergic alveolitis	respiratory	500.1	0.003446	23	49282	FALSE
Nutritional marasmus	endocrine/metabolic	260.22	0.00381243	281	51034	FALSE
Mineralocorticoid deficiency	endocrine/metabolic	255.22	0.00417959	49	60889	FALSE
Hyperemesis gravidarum	pregnancy complications	643.1	0.00420029	42	70149	FALSE
Althete's foot	infectious diseases	110.12	0.0042074	282	61133	FALSE
Hereditary hemolytic anemias	hematopoietic	282	0.00431523	171	46587	FALSE
Acute febrile mucocutaneous lymph node syndrome (Kawasaki disease)	circulatory system	446.2	0.00439518	29	58128	FALSE
Calcaneal spur; Exostosis NOS	musculoskeletal	726.4	0.00471856	176	54204	FALSE
Pericarditis	circulatory system	420.2	0.00484573	1017	64858	FALSE
Cellulitis and abscess of face/neck	dermatologic	681.2	0.00566173	485	59112	FALSE
Uterine/Uterovaginal prolapse	genitourinary	618.2	0.00585568	271	69189	FALSE
Viral warts & HPV	infectious diseases	078	0.00610567	1236	58653	FALSE
Fracture of tibia and fibula	injuries & poisonings	800.3	0.00737873	683	58739	FALSE
Restless legs syndrome	neurological	327.71	0.00769718	925	54926	FALSE
Actinic keratosis	dermatologic	702.1	0.00771939	3027	65204	FALSE
Functional disorders of bladder	genitourinary	596.5	0.0078605	1330	64721	FALSE
Chronic inflammatory disorders of orbit	sense organs	371.9	0.00816702	20	61143	FALSE
Hereditary hemochromatosis	hematopoietic	275.11	0.00818341	83	62773	FALSE
Disorders of refraction and accommodation; blindness and low vision	sense organs	367	0.00838281	2706	67479	FALSE
Myeloproliferative disease	neoplasms	200	0.00882721	1006	68224	FALSE
Elevated C-reactive protein (CRP)	symptoms	790.8	0.00951075	200	67842	FALSE
Cancer of liver and intrahepatic bile duct	neoplasms	155	0.00970904	568	62348	FALSE
Ulcerative colitis (chronic)	digestive	555.21	0.0113813	394	48693	FALSE
Symptoms involving female genital tract	genitourinary	624	0.0125831	186	65512	FALSE
Cardiac rhythm regulators causing adverse effects in therapeutic use	injuries & poisonings	972.1	0.0135505	21	54408	FALSE
Hypertrophy of female genital organs	genitourinary	623	0.0136731	130	69186	FALSE
Central origin vertigo	sense organs	386.21	0.0137121	107	60191	FALSE
Torsion dystonia	neurological	333.4	0.0141102	348	54703	FALSE
Conditions involving the integument and temperature regulation of fetus and newborn	pregnancy complications	656.7	0.0144323	152	68831	FALSE
Premenstrual tension syndromes	genitourinary	626.4	0.0145149	41	58660	FALSE
Hypercholesterolemia	endocrine/metabolic	272.11	0.0149007	6698	52182	FALSE
Pathological, developmental or recurrent dislocation	musculoskeletal	742.2	0.0156243	96	59108	FALSE
Sickle cell anemia	hematopoietic	282.5	0.0156687	20	46436	FALSE
Calculus of bile duct	digestive	574.2	0.0163649	303	64383	FALSE
Adult failure to thrive	endocrine/metabolic	260.3	0.0164492	1021	51774	FALSE
Carditis	circulatory system	420	0.0171278	1448	65289	FALSE
Internal derangement of knee	injuries & poisonings	835	0.0175857	981	66383	FALSE
Sleep related movement disorders	neurological	327.7	0.0177133	1041	55042	FALSE
Acquired deformities of hip	musculoskeletal	736.3	0.0177168	33	61409	FALSE
Bullous dermatoses	dermatologic	695.2	0.0178991	66	60334	FALSE
Prolapse of vaginal vault after hysterectomy	genitourinary	618.5	0.0179634	292	69210	FALSE
Cellulitis and abscess of foot, toe	dermatologic	681.6	0.0183821	371	58998	FALSE
Peripheral retinal degenerations	sense organs	362.6	0.0185991	98	63706	FALSE
Acute vascular insufficiency of intestine	circulatory system	441.1	0.0196388	185	58284	FALSE
Rhabdomyolysis	symptoms	772.4	0.0199864	202	61821	FALSE
Neuralgia, neuritis, and radiculitis NOS	symptoms	766	0.0201008	1392	63887	FALSE
Chronic venous insufficiency [CVI]	circulatory system	456	0.020269	605	54647	FALSE
Open wound or laceration of eye or eyelid	injuries & poisonings	870.1	0.0208365	64	62481	FALSE
Acne	dermatologic	706.1	0.0215578	936	64312	FALSE
Osteoarthrosis	musculoskeletal	740	0.0217429	8930	63916	FALSE
Benign neoplasm of pituitary gland and craniopharyngeal duct (pouch)	neoplasms	227.3	0.0222728	244	68386	FALSE
Spasm of muscle	symptoms	772.2	0.022426	1493	63112	FALSE
Lymphosarcoma	neoplasms	202.23	0.0224905	74	67292	FALSE
Ectopic pregnancy	pregnancy complications	634.3	0.022702	37	67445	FALSE
Other abnormality of urination	genitourinary	599.9	0.0228432	1511	53694	FALSE
Mucous polyp of cervix	genitourinary	622.2	0.0231171	61	69117	FALSE
Other acquired deformities of limbs	musculoskeletal	736	0.0231723	371	61747	FALSE
Jaw disease NOS	digestive	526.9	0.0232292	91	64787	FALSE
Other conditions or status of the mother complicating pregnancy, childbirth, or the puerperium	pregnancy complications	649	0.0232404	1151	68887	FALSE
Congenital hypertrophic pyloric stenosis	congenital anomalies	750.5	0.0234647	33	66291	FALSE
H. pylori	infectious diseases	041.8	0.0234971	107	58810	FALSE
Hypersensitivity angiitis	circulatory system	446.3	0.023525	43	58142	FALSE
Acute upper respiratory infections of multiple or unspecified sites	respiratory	465	0.0236118	6949	59153	FALSE
Abnormal results of function study of liver	digestive	573.7	0.024921	567	57197	FALSE
Other symptoms/disorders or the urinary system	genitourinary	599	0.0259598	7690	59873	FALSE
Ovarian dysfunction	endocrine/metabolic	256	0.0260831	579	61419	FALSE
Seborrheic dermatitis	dermatologic	690.1	0.0266077	634	60902	FALSE
Osteochondritis dissecans	musculoskeletal	732.7	0.0267397	63	57782	FALSE
Gingival and periodontal diseases	digestive	523	0.0272398	740	65436	FALSE
Thyroiditis, acute and subacute	endocrine/metabolic	245.1	0.0288602	54	56416	FALSE
Dermatitis herpetiformis	dermatologic	695.21	0.0288602	25	60293	FALSE
Dislocation	injuries & poisonings	830	0.0290783	1741	67143	FALSE
Erythematosquamous dermatosis	dermatologic	690	0.0294955	638	60906	FALSE
Atherosclerosis of aorta	circulatory system	440.9	0.0302993	477	58576	FALSE
Other disorders of bladder	genitourinary	596	0.0309021	1834	65225	FALSE
Lipoma	neoplasms	214	0.031783	436	68979	FALSE
Abnormality of organs and soft tissues of pelvis complicating pregnancy, childbirth, or the puerperium	pregnancy complications	654.1	0.0327114	162	68960	FALSE
Hallux valgus (Bunion)	musculoskeletal	735.3	0.0332713	492	61868	FALSE
Myelofibrosis	hematopoietic	289.1	0.0335089	132	52793	FALSE
Premature beats	circulatory system	427.6	0.0338126	1017	45468	FALSE
Peripheral vascular disease, unspecified	circulatory system	443.9	0.0338669	1939	60038	FALSE
Other derangement of joint	musculoskeletal	742.9	0.0343664	656	59668	FALSE
Malignant neoplasm of small intestine, including duodenum	neoplasms	159.2	0.0345049	251	62031	FALSE
Degenerative skin conditions and other dermatoses	dermatologic	702	0.0345905	4531	62597	FALSE
Dental caries	digestive	521.1	0.0350845	1400	66096	FALSE
Chronic dermatitis due to solar radiation	dermatologic	938.2	0.0362951	1170	57448	FALSE
Disorders of protein plasma/amino-acid transport and metabolism	endocrine/metabolic	270	0.0364522	888	67129	FALSE
Hemorrhage or hematoma complicating a procedure	injuries & poisonings	850	0.0373348	911	61282	FALSE
Retinoschisis and retinal cysts	sense organs	361.2	0.037842	21	64125	FALSE
Abnormal electrocardiogram [ECG] [EKG]	circulatory system	426.7	0.0380438	333	44784	FALSE
Cancer of nasopharynx	neoplasms	149.2	0.0381797	100	68215	FALSE
Pilonidal cyst	dermatologic	686.3	0.0383637	75	58702	FALSE
Complex regional/central pain syndrome	neurological	355	0.0413033	393	61615	FALSE
Noninflammatory female genital disorders	genitourinary	619	0.0420638	1324	67641	FALSE
Herpes zoster	infectious diseases	053	0.042454	681	58098	FALSE
Contracture of palmar fascia [Dupuytren's disease]	musculoskeletal	728.71	0.0426837	149	54177	FALSE
Alcoholism	mental disorders	317.1	0.0427202	1131	55737	FALSE
Disorders of amino-acid metabolism	endocrine/metabolic	270.2	0.0429776	105	66346	FALSE
Infertility, male	genitourinary	609.1	0.04405	21	61915	FALSE
Other hereditary hemolytic anemias	hematopoietic	282.9	0.0442374	127	46543	FALSE
Secondary malignant neoplasm of digestive systems	neoplasms	198.3	0.0444968	1094	53834	FALSE
Muscular dystrophies	neurological	359.1	0.0445775	80	63166	FALSE
Acute and subacute necrosis of liver	digestive	573.4	0.0447088	368	56998	FALSE
Nonallopathic lesions NEC	symptoms	769	0.0463831	73	70280	FALSE
Hearing loss	sense organs	389	0.0465582	3985	66066	FALSE
Other dyschromia	dermatologic	694.2	0.0469276	1126	61394	FALSE
Chronic interstitial cystitis	genitourinary	592.13	0.0479255	199	52576	FALSE
Noninflammatory disorders of cervix	genitourinary	619.3	0.0488799	89	66406	FALSE
Acquired coagulation factor deficiency	hematopoietic	286.4	0.0493894	100	55129	FALSE
Anemia during pregnancy	pregnancy complications	644	0.0495019	86	70029	FALSE
Fracture of upper limb	injuries & poisonings	803	0.0497861	2264	60320	FALSE
Diseases of hard tissues of teeth	digestive	521	0.0500121	1418	66114	FALSE
Noninflammatory disorders of vulva and perineum	genitourinary	619.5	0.050273	198	66515	FALSE
Myopia	sense organs	367.1	0.0508164	1720	66493	FALSE
Stricture/obstruction of ureter	genitourinary	586.4	0.0508746	685	53834	FALSE
Disorders of lipoid metabolism	endocrine/metabolic	272	0.0514822	18838	64322	FALSE
Dermatitis due to solar radiation	dermatologic	938	0.0521794	1277	57555	FALSE
Cysts of oral soft tissues	digestive	528.4	0.0522722	22	65802	FALSE
Elevated carcinoembryonic antigen [CEA]	symptoms	795.81	0.0523832	77	70205	FALSE
Nonspecific abnormal findings on radiological and other examination of biliary tract	digestive	575.9	0.0524353	67	64147	FALSE
Elevated prostate specific antigen [PSA]	genitourinary	796	0.0525035	441	63385	FALSE
Pyelonephritis	genitourinary	590	0.0526291	918	53295	FALSE
Unspecified erythematous condition	dermatologic	695.9	0.0546408	211	60479	FALSE
Other diseases of blood and blood-forming organs	hematopoietic	289	0.0547985	888	53549	FALSE
Other demyelinating diseases of central nervous system	neurological	341	0.0548833	564	54919	FALSE
Disorders of calcium/phosphorus metabolism	endocrine/metabolic	275.5	0.0549479	1584	64274	FALSE
Hyperlipidemia	endocrine/metabolic	272.1	0.0551059	18826	64310	FALSE
Laxity of ligament or hypermobility syndrome	musculoskeletal	728.2	0.0555023	119	54147	FALSE
Other disorders of urethra and urinary tract	genitourinary	597	0.0562647	742	64133	FALSE
Nevus, non-neoplastic	neoplasms	217.1	0.0573258	225	62985	FALSE
Diverticulitis	digestive	562.2	0.0586415	721	49020	FALSE
Pituitary hyperfunction	endocrine/metabolic	253.1	0.0610879	174	61014	FALSE
Vitiligo	dermatologic	694.1	0.0626826	54	60322	FALSE
Retinal vascular changes and abnomalities	sense organs	362.4	0.0631963	317	63925	FALSE
Other local infections of skin and subcutaneous tissue	dermatologic	686	0.0634617	1000	59627	FALSE
Cyst of bone	musculoskeletal	733.2	0.0635211	73	57792	FALSE
Acquired foot deformities	musculoskeletal	735	0.0643467	1746	63122	FALSE
Other specified osteoporosis	musculoskeletal	743.13	0.0653531	1266	59740	FALSE
Disorders of penis	genitourinary	604	0.0667922	494	62388	FALSE
Adverse effects of sedatives or other central nervous system depressants and anesthetics	injuries & poisonings	967	0.0680239	130	54517	FALSE
Melanomas of skin	neoplasms	172.11	0.0682827	1209	60729	FALSE
Insulin pump user	endocrine/metabolic	250.3	0.068873	3108	57304	FALSE
Urinary tract infection	genitourinary	591	0.0699646	8449	60826	FALSE
Qualitative platelet defects	hematopoietic	287.4	0.0699648	38	55067	FALSE
Other biliary tract disease	digestive	575	0.0710245	1335	65415	FALSE
Tics and stuttering	mental disorders	313.2	0.0713947	118	65325	FALSE
Ulceration of intestine	digestive	556.1	0.0715282	239	48538	FALSE
Hereditary and idiopathic peripheral neuropathy	neurological	356	0.0742138	1726	64812	FALSE
Folate-deficiency anemia	hematopoietic	281.13	0.074375	24	46440	FALSE
Sensorineural hearing loss	sense organs	389.1	0.074886	2515	64596	FALSE
Non-proliferative glomerulonephritis	genitourinary	580.12	0.0753387	134	53283	FALSE
Fracture of lower limb	injuries & poisonings	800	0.0763425	2178	60234	FALSE
Derangement of joint, non-traumatic	musculoskeletal	742	0.0772197	796	59808	FALSE
Ileostomy status	digestive	559	0.0779622	481	48780	FALSE
Telogen effluvium	dermatologic	704.12	0.0779958	82	65501	FALSE
Fracture of humerus	injuries & poisonings	803.1	0.0787924	610	58666	FALSE
Menopausal and postmenopausal disorders	genitourinary	627	0.0792801	3862	62481	FALSE
Meniere's disease	sense organs	386.1	0.0809875	213	60297	FALSE
Congenital pigmentary anomalies of skin	dermatologic	691.3	0.0810947	37	60305	FALSE
Congenital anomalies of the eye	congenital anomalies	753	0.0820465	115	68738	FALSE
Congenital anomalies of posterior segment of eye	congenital anomalies	753.2	0.0827577	55	68678	FALSE
Nasal polyps	respiratory	471	0.0834886	210	49571	FALSE
Arthropathy associated with other disorders classified elsewhere	musculoskeletal	713	0.0843059	239	58347	FALSE
Cardiac and circulatory congenital anomalies	congenital anomalies	747	0.0847053	3035	68857	FALSE
Acromegaly and gigantism	endocrine/metabolic	253.11	0.0861506	31	60871	FALSE
Gangrene	symptoms	791	0.087262	201	70228	FALSE
Acute bronchospasm	respiratory	498	0.0873045	76	55434	FALSE
Complication of internal orthopedic device	injuries & poisonings	858	0.0880961	864	61235	FALSE
Elevated sedimentation rate	symptoms	790.1	0.088503	161	67803	FALSE
Impaired fasting glucose	endocrine/metabolic	250.41	0.0900666	587	54783	FALSE
Mitral valve stenosis and aortic valve stenosis	circulatory system	394.1	0.0901758	383	57873	FALSE
Prurigo and Lichen	dermatologic	695.7	0.0903105	238	60506	FALSE
Central/nonobstroctive sleep apnea	neurological	327.31	0.0905709	117	54118	FALSE
Sexually transmitted infections (not HIV or hepatitis)	infectious diseases	090	0.0909476	215	70169	FALSE
Absent or infrequent menstruation	genitourinary	626.11	0.091025	467	59086	FALSE
Other inflammatory disorders of male genital organs	genitourinary	601.8	0.0917504	72	63016	FALSE
Scleritis and episcleritis	sense organs	379.1	0.092367	141	61329	FALSE
Antepartum hemorrhage, abruptio placentae, and placenta previa	pregnancy complications	635.2	0.0924949	224	67632	FALSE
Fracture of ribs	injuries & poisonings	807	0.0930318	623	58679	FALSE
Morbid obesity	endocrine/metabolic	278.11	0.09444	3185	57292	FALSE
Rhesus isoimmunization in pregnancy	pregnancy complications	654.2	0.0946357	50	68848	FALSE
Cholecystitis without cholelithiasis	digestive	574.3	0.0951255	449	64529	FALSE
Acute prostatitis	genitourinary	601.11	0.0968654	112	63056	FALSE
Heart failure with preserved EF [Diastolic heart failure]	circulatory system	428.4	0.0970029	2129	59376	FALSE
Sialoadenitis	digestive	527.2	0.0970845	146	65926	FALSE
Transient mental disorders due to conditions classified elsewhere	mental disorders	291.1	0.0971929	72	56602	FALSE
Excessive vomiting in pregnancy	pregnancy complications	643	0.0986071	85	70192	FALSE
Neonatal bradycardia or tachycardia	pregnancy complications	656.9	0.0986379	91	68770	FALSE
Acute pericarditis	circulatory system	420.21	0.098849	145	63986	FALSE
Other disorders of gallbladder	digestive	575.7	0.100465	284	64364	FALSE
Other specified benign mammary dysplasias	genitourinary	610.8	0.100514	123	63394	FALSE
Polyphagia	endocrine/metabolic	260.7	0.100778	20	50773	FALSE
Stomatitis and mucositis (ulcerative)	digestive	528.11	0.101067	155	65935	FALSE
Gastritis and duodenitis	digestive	535	0.101915	1149	61840	FALSE
Congenital anomalies of intestine	congenital anomalies	750.21	0.101941	205	66463	FALSE
Disorders of vitreous body	sense organs	379.2	0.10227	1764	62952	FALSE
Abdominal pain	symptoms	785	0.102474	14602	59003	FALSE
Viral hepatitis	infectious diseases	070	0.10354	1456	58873	FALSE
Spina bifida	congenital anomalies	752.11	0.105658	178	68801	FALSE
Congenital anomalies of skull and face bones	congenital anomalies	749.2	0.106756	229	69268	FALSE
Chronic pain	neurological	338.2	0.106848	4294	59323	FALSE
Chromosomal anomalies and genetic disorders	congenital anomalies	758	0.108127	438	68107	FALSE
Miscarriage; stillbirth	pregnancy complications	634	0.108221	396	67804	FALSE
Cardiac congenital anomalies	congenital anomalies	747.1	0.10923	2831	68653	FALSE
Protein-calorie malnutrition	endocrine/metabolic	260	0.109388	4486	55239	FALSE
Polyglandular activity in multiple endocrine adenomatosis	endocrine/metabolic	259.8	0.109493	43	60883	FALSE
Other deficiencies of circulating enzymes	endocrine/metabolic	277.6	0.109837	32	67006	FALSE
Essential tremor	neurological	333.1	0.111623	613	54968	FALSE
Chronic tonsillitis and adenoiditis	respiratory	474.2	0.112647	1053	50414	FALSE
Neuroendocrine tumors	neoplasms	209	0.113146	162	70349	FALSE
Adrenogenital disorders	endocrine/metabolic	255.3	0.114592	43	60883	FALSE
Malignant neoplasm, other	neoplasms	195.1	0.114868	1737	54477	FALSE
Hereditary disturbances in tooth structure	digestive	520.1	0.115039	28	64724	FALSE
Coagulation defects complicating pregnancy or postpartum	hematopoietic	286.3	0.116944	76	55105	FALSE
Superficial keratitis	sense organs	370.2	0.11766	79	61202	FALSE
Epiphora	sense organs	375.2	0.118743	93	61281	FALSE
Dyschromia and Vitiligo	dermatologic	694	0.119072	1189	61457	FALSE
Diseases of the larynx and vocal cords	respiratory	473	0.119194	1961	51322	FALSE
Loss of teeth or edentulism	digestive	525.1	0.119408	205	64901	FALSE
Corneal degenerations	sense organs	364.4	0.120316	103	64207	FALSE
Cancer of larynx	neoplasms	149.4	0.1205	393	68508	FALSE
Anisometropia	sense organs	368.3	0.120799	46	65014	FALSE
Short gestation; low birth weight; and fetal growth retardation	pregnancy complications	637	0.121118	87	67289	FALSE
Disorders of esophageal motility	digestive	530.5	0.121296	222	44541	FALSE
Hypermetropia	sense organs	367.8	0.121921	377	65150	FALSE
Cancer, suspected or other	neoplasms	195	0.122304	3526	56266	FALSE
Extrapyramidal disease and abnormal movement disorders	neurological	333	0.122351	1326	55681	FALSE
Allergic rhinitis	respiratory	476	0.123515	6455	55816	FALSE
Type 2 diabetes with ketoacidosis	endocrine/metabolic	250.21	0.124135	133	54329	FALSE
Malignant neoplasm of retroperitoneum and peritoneum	neoplasms	159.4	0.124453	181	61961	FALSE
Benign neoplasm of other parts of digestive system	neoplasms	211	0.124836	459	64093	FALSE
Dysmenorrhea	genitourinary	626.2	0.125557	366	58985	FALSE
Fracture of clavicle or scapula	injuries & poisonings	803.3	0.125975	376	58432	FALSE
Abnormal findings on study of brain and/or nervous system	neurological	346	0.126628	37	54392	FALSE
Paralysis/spasm of vocal cords or larynx	respiratory	473.3	0.126795	414	49775	FALSE
Abnormal results of function study of thyroid	endocrine/metabolic	246.7	0.127274	130	56492	FALSE
Immunity deficiency	endocrine/metabolic	279.1	0.127429	1393	66444	FALSE
Personal history of allergy to medicinal agents	injuries & poisonings	977	0.129687	1525	55912	FALSE
Lower gastrointestinal congenital anomalies	congenital anomalies	750.2	0.130368	314	66572	FALSE
Redundant prepuce and phimosis/BXO	genitourinary	604.1	0.131053	316	62210	FALSE
Phlebitis and thrombophlebitis of lower extremities	circulatory system	451.2	0.131343	194	54236	FALSE
Cervicitis and endocervicitis	genitourinary	614.51	0.131603	73	66147	FALSE
Cancer of other endocrine glands	neoplasms	194	0.131664	125	68267	FALSE
Hemorrhage in early pregnancy	pregnancy complications	636.3	0.131768	361	67769	FALSE
Cancer of of nasal cavities	neoplasms	149.9	0.131863	154	68269	FALSE
Disease of capillaries	circulatory system	448	0.132466	27	58126	FALSE
Tachycardia NOS	circulatory system	427.7	0.132831	5450	49901	FALSE
Genital prolapse	genitourinary	618	0.133308	909	69827	FALSE
Chronic obstructive asthma	respiratory	495.1	0.133391	352	55710	FALSE
Screening for malignant neoplasms of the skin	neoplasms	216.1	0.133634	46	62806	FALSE
Blister	injuries & poisonings	911	0.133669	38	70232	FALSE
Cholelithiasis with other cholecystitis	digestive	574.12	0.133989	408	64488	FALSE
Inflammatory and toxic neuropathy	neurological	357	0.13431	1462	64548	FALSE
Osteoarthritis; localized	musculoskeletal	740.1	0.134825	5287	60273	FALSE
Arterial embolism and thrombosis	circulatory system	444	0.136529	467	58566	FALSE
Dermatochalasis	sense organs	374.6	0.137119	862	61985	FALSE
Macular degeneration, wet	sense organs	362.22	0.138191	143	63751	FALSE
Disorders of urea cycle metabolism	endocrine/metabolic	270.21	0.138957	74	66315	FALSE
Fibrosclerosis of breast	genitourinary	610.3	0.139815	125	63396	FALSE
Other chronic ischemic heart disease, unspecified	circulatory system	411.8	0.140535	3081	55504	FALSE
Duodenal ulcer	digestive	531.3	0.140841	221	67000	FALSE
Disorders of iron metabolism	hematopoietic	275.1	0.140958	246	62936	FALSE
Paroxysmal supraventricular tachycardia	circulatory system	427.11	0.141104	1271	45722	FALSE
Other alveolar and parietoalveolar pneumonopathy	respiratory	504	0.143068	472	49731	FALSE
Urethral hypermobility/ISD	genitourinary	597.8	0.1435	271	63662	FALSE
Disorders of plasma protein metabolism	endocrine/metabolic	270.3	0.14408	709	66950	FALSE
Nontoxic uninodular goiter	endocrine/metabolic	241.1	0.146216	925	57287	FALSE
Benign neoplasm of skin	neoplasms	216	0.147309	2440	65200	FALSE
Reflux esophagitis	digestive	530.14	0.147555	656	44975	FALSE
Acute glomerulonephritis, NOS	genitourinary	580.13	0.147955	52	53201	FALSE
Vascular insufficiency of intestine	circulatory system	441	0.148043	389	58488	FALSE
Diseases of pancreas	digestive	577	0.148335	1424	69261	FALSE
Pervasive developmental disorders	mental disorders	313	0.14866	1681	66888	FALSE
Benign neoplasm of other endocrine glands and related structures	neoplasms	227	0.149015	499	68641	FALSE
Vascular hamartomas and non-neoplastic nevi	neoplasms	217	0.15023	275	63035	FALSE
Atrophic gastritis	digestive	535.2	0.150269	479	61170	FALSE
Lipoma of skin and subcutaneous tissue	neoplasms	214.1	0.150675	318	68861	FALSE
Hemorrhage of rectum and anus	digestive	578.8	0.151953	1236	57188	FALSE
Malignant neoplasm of other and ill-defined sites within the digestive organs and peritoneum	neoplasms	159	0.153042	868	62648	FALSE
Irregular menstrual cycle/bleeding	genitourinary	626.1	0.154158	2245	60864	FALSE
Aphasia	mental disorders	292.11	0.154587	497	57027	FALSE
Calculus of lower urinary tract	genitourinary	594.2	0.154898	152	64335	FALSE
Congenital hypothyroidism	endocrine/metabolic	244.5	0.157021	102	56464	FALSE
Atopic/contact dermatitis due to other or unspecified	dermatologic	939	0.157344	2724	59002	FALSE
Muscular calcification and ossification	musculoskeletal	728.1	0.15779	50	54078	FALSE
Other diseases of the teeth and supporting structures	digestive	525	0.159003	376	65072	FALSE
Urethral stricture (not specified as infectious)	genitourinary	597.1	0.159339	230	63621	FALSE
Gastrointestinal complications	digestive	569.2	0.160218	1322	59907	FALSE
Neoplasm of uncertain behavior of breast	neoplasms	174.3	0.161107	138	62672	FALSE
Other congenital anomalies of lower limb, including pelvic girdle	congenital anomalies	755.6	0.161177	196	68161	FALSE
Congenital hip dysplasia and deformity	congenital anomalies	755.61	0.161654	181	68146	FALSE
Cyst of kidney, acquired	genitourinary	586.2	0.16174	909	54058	FALSE
Disorder of skin and subcutaneous tissue NOS	dermatologic	689	0.161826	1108	67221	FALSE
Fracture of vertebral column without mention of spinal cord injury	injuries & poisonings	805	0.163242	1418	59474	FALSE
Bronchitis	respiratory	497	0.164022	761	56119	FALSE
Nephritis; nephrosis; renal sclerosis	genitourinary	580	0.164342	1043	54192	FALSE
Cardiac dysrhythmias	circulatory system	427	0.164411	16559	61010	FALSE
Circumscribed scleroderma	dermatologic	701.3	0.164539	154	63225	FALSE
Neural tube defects	congenital anomalies	752.1	0.164963	212	68835	FALSE
Osteoarthrosis NOS	musculoskeletal	740.9	0.165926	5308	60294	FALSE
Hemorrhage during pregnancy; childbirth and postpartum	pregnancy complications	635	0.166253	321	67729	FALSE
Other disorders of the kidney and ureters	genitourinary	586	0.166708	4502	57651	FALSE
Panniculitis	musculoskeletal	729.3	0.167333	51	54079	FALSE
Other upper respiratory disease	respiratory	479	0.167481	2581	51942	FALSE
Defibrination syndrome	hematopoietic	286.6	0.167959	94	55123	FALSE
Lymphadenitis	hematopoietic	289.4	0.169011	2646	55307	FALSE
Other disorders of tympanic membrane	sense organs	384	0.169296	356	61737	FALSE
Benign neoplasm of eye, uveal	neoplasms	224.1	0.169341	152	68008	FALSE
Mineral deficiency NEC	endocrine/metabolic	262	0.169958	310	51063	FALSE
Deficiency of humoral immunity	endocrine/metabolic	279.11	0.170407	223	65274	FALSE
Skin cancer	neoplasms	172	0.17187	4853	64373	FALSE
Keratoderma, acquired	dermatologic	701.1	0.173025	135	63206	FALSE
Anatomical abnormatilies of kidney and ureters	genitourinary	586.1	0.174191	275	53424	FALSE
Medulloadrenal hyperfunction	endocrine/metabolic	255.13	0.174193	42	60882	FALSE
Autism	mental disorders	313.3	0.175137	520	65727	FALSE
Atherosclerosis of the extremities	circulatory system	440.2	0.175261	911	59010	FALSE
Other disorders of carbohydrate transport and metabolism	endocrine/metabolic	271.9	0.1765	64	69877	FALSE
Vesicoureteral reflux	genitourinary	586.12	0.176936	267	53416	FALSE
Hemangioma of skin and subcutaneous tissue	neoplasms	228.1	0.177233	476	68572	FALSE
Hemangioma and lymphangioma, any site	neoplasms	228	0.177517	614	68710	FALSE
Open wound of hand except finger(s)	injuries & poisonings	871.1	0.177798	243	62660	FALSE
Polycystic ovaries	endocrine/metabolic	256.4	0.178512	453	61293	FALSE
Cellulitis and abscess of leg, except foot	dermatologic	681.5	0.178704	1670	60297	FALSE
Idiopathic fibrosing alveolitis	respiratory	504.1	0.179197	261	49520	FALSE
Overweight, obesity and other hyperalimentation	endocrine/metabolic	278	0.179488	7859	61966	FALSE
Other vitamin B12 deficiency anemia	hematopoietic	281.12	0.179826	635	47051	FALSE
Alpha-1-antitrypsin deficiency	endocrine/metabolic	270.34	0.179941	104	66345	FALSE
Hereditary retinal dystrophies	sense organs	362.7	0.181059	82	63690	FALSE
Impacted cerumen	sense organs	380.4	0.181336	1523	67222	FALSE
Polyp of female genital organs	genitourinary	622	0.181493	295	69351	FALSE
Congenital musculoskeletal deformities of spine	congenital anomalies	754	0.182171	202	68167	FALSE
Pain	neurological	338	0.182898	9769	64798	FALSE
Chronic bronchitis	respiratory	496.2	0.184547	1390	56748	FALSE
Hematemesis	digestive	578.1	0.185275	531	56483	FALSE
Sleep apnea	neurological	327.3	0.186176	5667	59668	FALSE
Cholelithiasis with acute cholecystitis	digestive	574.11	0.186458	159	64239	FALSE
Acute and chronic tonsillitis	respiratory	474	0.187047	1155	50516	FALSE
Simple and unspecified goiter	endocrine/metabolic	240	0.187291	391	56753	FALSE
Problems associated with amniotic cavity and membranes	pregnancy complications	653	0.188325	554	69352	FALSE
Lesions of stomach and duodenum	digestive	537.1	0.188704	83	60774	FALSE
Candidiasis	infectious diseases	112	0.189552	1948	62799	FALSE
Sprains and strains of back and neck	injuries & poisonings	841	0.189982	826	62597	FALSE
Vaginal enterocele, congenital or acquired	genitourinary	618.6	0.190566	237	69155	FALSE
Periodontitis (acute or chronic)	digestive	523.3	0.190891	214	64910	FALSE
Complication of colostomy or enterostomy	injuries & poisonings	853	0.191393	294	60665	FALSE
Cerebral cysts	neurological	348.4	0.192891	150	54505	FALSE
Chronic pulmonary heart disease	circulatory system	415.2	0.193098	2156	59894	FALSE
Infantile cerebral palsy	neurological	343	0.193366	440	54795	FALSE
Calculus of ureter	genitourinary	594.3	0.193882	756	64939	FALSE
Other disorders of male genital organs	genitourinary	608	0.193999	428	62322	FALSE
Visual field defects	sense organs	368.4	0.194228	264	65232	FALSE
Hypovolemia	endocrine/metabolic	276.5	0.19443	6347	52893	FALSE
Neoplasm of uncertain behavior of skin	neoplasms	173	0.19505	3529	63049	FALSE
Dystrophy of female genital tract	genitourinary	624.1	0.196549	39	65365	FALSE
Atherosclerosis of renal artery	circulatory system	440.1	0.197032	309	58408	FALSE
Perforation of tympanic membrane	sense organs	384.4	0.197697	324	61705	FALSE
Gastrointestinal hemorrhage	digestive	578	0.197774	4120	60072	FALSE
Costochondritis	musculoskeletal	733.6	0.19915	80	57799	FALSE
Cancer of stomach	neoplasms	151	0.19941	525	62305	FALSE
Infectious mononucleosis	infectious diseases	079.2	0.199713	113	57530	FALSE
Diaphragmatic hernia	digestive	550.2	0.19979	1834	63468	FALSE
Disturbances of sensation of smell and taste	neurological	350.6	0.200248	169	62142	FALSE
Congestive heart failure; nonhypertensive	circulatory system	428	0.201482	7017	64264	FALSE
Cardiomegaly	circulatory system	416	0.201491	4670	62408	FALSE
Prostatitis	genitourinary	601.1	0.201505	271	63215	FALSE
Neurofibromatosis	neoplasms	199.4	0.201897	71	52811	FALSE
Antisocial/borderline personality disorder	mental disorders	301.2	0.202805	216	43896	FALSE
Carbuncle and furuncle	dermatologic	686.1	0.203575	212	58839	FALSE
Pulmonary insufficiency or respiratory failure following trauma and surgery	respiratory	509.3	0.203765	1802	51061	FALSE
Abnormal tumor markers	symptoms	795.8	0.204374	149	70277	FALSE
Senile osteoporosis	musculoskeletal	743.12	0.204874	938	59412	FALSE
Gastroparesis	digestive	536.3	0.204981	441	61132	FALSE
Disorders involving the immune mechanism	endocrine/metabolic	279	0.206285	1718	66769	FALSE
Inflammatory diseases of prostate	genitourinary	601	0.206849	524	63468	FALSE
Hypotension	circulatory system	458	0.207534	5335	63060	FALSE
Other mental disorder	mental disorders	306	0.208302	1715	45395	FALSE
Diverticulosis and diverticulitis	digestive	562	0.209117	3039	51338	FALSE
Chronic obstructive asthma with exacerbation	respiratory	495.11	0.21018	65	55423	FALSE
Atherosclerosis of native arteries of the extremities with intermittent claudication	circulatory system	440.22	0.210259	593	58692	FALSE
Acute pain	neurological	338.1	0.210456	6950	61979	FALSE
Congenital anomalies of mouth/tongue	congenital anomalies	750.13	0.210624	97	66355	FALSE
Joint/ligament sprain	injuries & poisonings	840.3	0.211375	596	62367	FALSE
Cancer of lip	neoplasms	145.1	0.211992	21	68136	FALSE
Noninfectious disorders of lymphatic channels	circulatory system	450	0.212426	920	69756	FALSE
Congenital anomalies of urinary system	congenital anomalies	751.2	0.212875	665	66923	FALSE
Viral hepatitis C	infectious diseases	070.3	0.21413	1285	58702	FALSE
Other endocrine disorders	endocrine/metabolic	259	0.214376	286	61126	FALSE
Generalized anxiety disorder	mental disorders	300.11	0.214474	1629	45309	FALSE
Noninflammatory disorders of ovary, fallopian tube, and broad ligament	genitourinary	619.1	0.214774	228	66545	FALSE
Hydronephrosis	genitourinary	595	0.215314	1440	65623	FALSE
Lumbosacral spondylolysis, congenital	congenital anomalies	754.1	0.215514	27	67992	FALSE
Spinal enthesopathy	musculoskeletal	715.3	0.215979	65	59759	FALSE
Fracture of neck of femur	injuries & poisonings	800.1	0.216279	732	58788	FALSE
Disturbance of skin sensation	dermatologic	687.4	0.216768	3052	58008	FALSE
Blindness and low vision	sense organs	367.9	0.217121	452	65225	FALSE
Radiotherapy	neoplasms	196	0.21858	1833	54573	FALSE
Fracture of radius and ulna	injuries & poisonings	803.2	0.218818	1226	59282	FALSE
Irregular menstrual bleeding	genitourinary	626.14	0.219517	194	58813	FALSE
Migraine	neurological	340	0.219846	2556	65047	FALSE
Persistent vomiting	symptoms	789.1	0.22065	95	52278	FALSE
Paroxysmal tachycardia, unspecified	circulatory system	427.1	0.220713	2797	47248	FALSE
Primary pulmonary hypertension	circulatory system	415.21	0.220808	425	58163	FALSE
Missed abortion/Hydatidiform mole	pregnancy complications	634.1	0.220862	202	67610	FALSE
Ulceration of the lower GI tract	digestive	556	0.22092	274	48573	FALSE
Other disorders of intestine	digestive	569	0.22146	2743	61328	FALSE
Encephalitis	neurological	323	0.222273	170	69238	FALSE
Vascular complications of surgery and medical procedures	injuries & poisonings	856	0.222345	92	60463	FALSE
Premature menopause and other ovarian failure	genitourinary	627.5	0.222641	105	58724	FALSE
Diaper or napkin rash	injuries & poisonings	949.1	0.223382	119	56397	FALSE
Congenital anomalies of peripheral vascular system	congenital anomalies	747.2	0.223597	203	66025	FALSE
Toxic effect of venom	injuries & poisonings	913	0.224434	113	68340	FALSE
Subarachnoid hemorrhage (injury)	injuries & poisonings	818.2	0.225052	151	67824	FALSE
Personality disorders	mental disorders	301	0.225798	360	44040	FALSE
Other abnormal blood chemistry	symptoms	790.6	0.226118	970	68612	FALSE
Isoimmunization of fetus or newborn	pregnancy complications	656.1	0.226333	43	68722	FALSE
Large cell lymphoma	neoplasms	202.24	0.228169	89	67307	FALSE
Hematuria	genitourinary	593	0.229519	2865	55242	FALSE
Hallux rigidus	musculoskeletal	735.23	0.229937	199	61575	FALSE
Specific nonpsychotic mental disorders due to brain damage	mental disorders	291.4	0.230101	297	56827	FALSE
Hematological disorders of newborn	pregnancy complications	656.5	0.230124	169	68848	FALSE
Cancer of larynx, pharynx, nasal cavities	neoplasms	149	0.230927	1157	69272	FALSE
Hypocalcemia	endocrine/metabolic	275.51	0.231062	692	63382	FALSE
Rupture of tendon, nontraumatic	musculoskeletal	727.6	0.231326	615	54643	FALSE
Bariatric surgery	digestive	539	0.231534	1001	70100	FALSE
Osteoporosis	musculoskeletal	743.1	0.231819	3927	62401	FALSE
Cellulitis and abscess of arm/hand	dermatologic	681.3	0.23248	697	59324	FALSE
Poisoning by psychotropic agents	injuries & poisonings	969	0.234194	162	54549	FALSE
Noninflammatory disorders of vagina	genitourinary	619.4	0.235111	511	66828	FALSE
Voice disturbance	respiratory	473.4	0.23571	1498	50859	FALSE
Vascular disorders of kidney/hypertrophy	genitourinary	586.3	0.235716	76	53225	FALSE
Histoplasmosis	infectious diseases	117.1	0.235931	167	61018	FALSE
Spinal cord injury without evidence of spinal bone injury	injuries & poisonings	952	0.236409	74	70308	FALSE
Vascular dementia	mental disorders	290.16	0.239226	160	56690	FALSE
Cancer of prostate	neoplasms	185	0.240365	1798	64742	FALSE
Otalgia	sense organs	382	0.240504	906	62287	FALSE
Infective connective tissue disorders	musculoskeletal	712	0.240854	168	58276	FALSE
Bursitis disorders	musculoskeletal	727.2	0.241698	207	54235	FALSE
Migrain with aura	neurological	340.1	0.24228	648	63139	FALSE
Gastritis and duodenitis, NOS	digestive	535.9	0.244655	320	61011	FALSE
Adrenal hypofunction	endocrine/metabolic	255.2	0.245088	835	61675	FALSE
Acute periodontitis	digestive	523.31	0.245101	155	64851	FALSE
Heartburn	digestive	530.9	0.245605	406	44725	FALSE
Encephalopathy, not elsewhere classified	neurological	348.8	0.245804	1403	55758	FALSE
Cancer of other lymphoid, histiocytic tissue	neoplasms	202	0.246434	519	67737	FALSE
Astigmatism	sense organs	367.2	0.247197	666	65439	FALSE
Kwashiorkor	endocrine/metabolic	260.21	0.248809	35	50788	FALSE
Alcohol-related disorders	mental disorders	317	0.249055	1524	56130	FALSE
Hodgkin's disease	neoplasms	201	0.24967	120	67338	FALSE
Respiratory insufficiency	respiratory	509.2	0.249833	1841	51100	FALSE
Anomalies of endocrine glands, congenital	congenital anomalies	759.1	0.250525	27	67696	FALSE
Diabetes or abnormal glucose tolerance complicating pregnancy	pregnancy complications	649.1	0.250601	501	68237	FALSE
Ulcerative colitis	digestive	555.2	0.251333	986	49285	FALSE
Cystic kidney disease	congenital anomalies	751.21	0.251488	415	66673	FALSE
Attention deficit hyperactivity disorder	mental disorders	313.1	0.252008	1149	66356	FALSE
Postmenopausal atrophic vaginitis	genitourinary	627.3	0.252086	1047	59666	FALSE
Acute (transverse) myelitis	neurological	323.2	0.252371	33	69101	FALSE
Urinary incontinence	genitourinary	599.4	0.253252	2217	54400	FALSE
Atherosclerosis	circulatory system	440	0.253312	1749	59848	FALSE
Disorders of lacrimal system	sense organs	375	0.253506	186	61374	FALSE
Memory loss	mental disorders	292.3	0.25529	1478	58008	FALSE
Other and unspecified coagulation defects	hematopoietic	286.7	0.255994	1795	56824	FALSE
Fever of unknown origin	symptoms	783	0.256317	8460	63346	FALSE
Throat pain	respiratory	478	0.25653	443	49804	FALSE
Hypotension NOS	circulatory system	458.9	0.256624	4561	62286	FALSE
Excessive or frequent menstruation	genitourinary	626.12	0.256963	992	59611	FALSE
Other nonmalignant breast conditions	genitourinary	613	0.257175	1363	67914	FALSE
Wegener's granulomatosis	circulatory system	446.4	0.259108	150	58249	FALSE
Intervertebral disc disorder with myelopathy	musculoskeletal	722.7	0.259797	196	56499	FALSE
Adrenal hyperfunction	endocrine/metabolic	255.1	0.260504	243	61083	FALSE
Acute sinusitis	respiratory	464	0.260918	3899	56103	FALSE
Polyarteritis nodosa and allied conditions	circulatory system	446	0.262006	553	58652	FALSE
Benign neoplasm of spinal cord, meninges	neoplasms	225.2	0.262464	47	67903	FALSE
Chronic ulcer of unspecified site	dermatologic	707.3	0.264067	314	67090	FALSE
Gouty arthropathy	endocrine/metabolic	274.11	0.264167	685	67464	FALSE
Allergy/adverse effect of penicillin	injuries & poisonings	960.2	0.264801	968	55355	FALSE
Prolapse of vaginal walls	genitourinary	618.1	0.265348	733	69651	FALSE
Transient alteration of awareness	mental disorders	292.5	0.265454	359	56889	FALSE
Malignant neoplasm of ovary and other uterine adnexa	neoplasms	184.1	0.26579	527	64234	FALSE
Other symptoms referable to back	musculoskeletal	724.8	0.266028	241	56544	FALSE
Nausea and vomiting	symptoms	789	0.267281	9434	61617	FALSE
Diverticulosis	digestive	562.1	0.267534	2686	50985	FALSE
Disorders of tooth development	digestive	520	0.267847	383	65079	FALSE
Peripheral vascular disease	circulatory system	443	0.268871	2481	60580	FALSE
Cardiac complications, not elsewhere classified	circulatory system	429.9	0.269275	403	57650	FALSE
Urinary obstruction	genitourinary	599.1	0.269461	265	52448	FALSE
Glossodynia	digestive	529.6	0.269518	47	65827	FALSE
Ganglion and cyst of synovium, tendon, and bursa	musculoskeletal	727.4	0.26992	455	54483	FALSE
Jaundice (not of newborn)	digestive	573.5	0.271788	738	57368	FALSE
Congenital anomalies of abdominal wall; diaphram	congenital anomalies	756.1	0.272875	79	68044	FALSE
Osteitis deformans and osteopathies associated with other disorders classified elsewhere	musculoskeletal	731	0.273316	87	57806	FALSE
Urethritis and urethral syndrome	genitourinary	592.2	0.27343	56	52433	FALSE
Organic or persistent insomnia	neurological	327.41	0.273815	441	54442	FALSE
Dysthymic disorder	mental disorders	300.4	0.274871	1156	44836	FALSE
Neoplasm of uncertain behavior	neoplasms	199	0.274987	2254	54994	FALSE
Myeloid leukemia, chronic	neoplasms	204.22	0.275384	296	67514	FALSE
Other and unspecified disc disorder	musculoskeletal	722.9	0.275692	150	56453	FALSE
Psoriatic arthropathy	dermatologic	696.42	0.275819	388	58077	FALSE
Heart failure NOS	circulatory system	428.2	0.276151	1921	59168	FALSE
Other nutritional deficiency	endocrine/metabolic	263	0.276967	537	51290	FALSE
Nonrheumatic aortic valve disorders	circulatory system	395.2	0.279186	2787	60277	FALSE
Obesity	endocrine/metabolic	278.1	0.279673	6646	60753	FALSE
Lump or mass in breast	genitourinary	611.3	0.279812	1693	64964	FALSE
Cyst of the salivary gland	digestive	528.41	0.279938	21	65801	FALSE
Acquired hemolytic anemias	hematopoietic	283	0.280005	183	46599	FALSE
Chronic Kidney Disease, Stage IV	genitourinary	585.34	0.280021	1344	54493	FALSE
Pneumoconiosis	respiratory	500.2	0.280785	26	49285	FALSE
Malunion and nonunion of fracture	musculoskeletal	733.8	0.280947	635	58354	FALSE
Cholelithiasis	digestive	574.1	0.280982	1654	65734	FALSE
Rickets or osteomalacia	endocrine/metabolic	261.41	0.281125	45	50798	FALSE
Chronic renal failure [CKD]	genitourinary	585.3	0.28218	5223	58372	FALSE
Viral infection	infectious diseases	079	0.283197	1582	58999	FALSE
Inflammatory bowel disease and other gastroenteritis and colitis	digestive	555	0.284628	2479	50778	FALSE
Precocious sexual development and puberty NEC	endocrine/metabolic	259.4	0.284729	113	60953	FALSE
Other complications of pregnancy NEC	pregnancy complications	646	0.28558	353	69800	FALSE
Other specified disorders of plasma protein metabolism	endocrine/metabolic	270.38	0.285894	218	66459	FALSE
Osteoporosis NOS	musculoskeletal	743.11	0.286606	3254	61728	FALSE
Nonsenile Cataract	sense organs	366.1	0.286648	28	63015	FALSE
Abnormality of red blood cells	hematopoietic	289.9	0.287206	76	52737	FALSE
Other benign neoplasm of connective and other soft tissue	neoplasms	215	0.288082	156	68699	FALSE
Symptomatic menopause	genitourinary	627.2	0.288396	2550	61169	FALSE
Disorders of mineral metabolism	endocrine/metabolic	275	0.289461	3708	66398	FALSE
Other specified cardiac dysrhythmias	circulatory system	427.3	0.289978	3368	47819	FALSE
Orthopnea	respiratory	513.32	0.290378	102	65037	FALSE
Other headache syndromes	neurological	339	0.291472	1803	64294	FALSE
Mental disorders durring/after pregnancy	mental disorders	306.1	0.292387	209	43889	FALSE
Congenital anomalies of muscle, tendon, fascia, and connective tissue	congenital anomalies	756.3	0.29253	100	68065	FALSE
Arterial dissection	circulatory system	442.4	0.293397	81	58180	FALSE
Functional digestive disorders	digestive	564	0.294001	2687	50986	FALSE
Abnormal Papanicolaou smear of cervix and cervical HPV	genitourinary	792	0.294271	1144	63047	FALSE
Other disorders of eye	sense organs	379	0.294518	2119	63307	FALSE
Diseases of spleen	hematopoietic	289.5	0.296132	247	52908	FALSE
Hx of malignant neoplasm of oral cavity and pharynx	neoplasms	149.5	0.29618	551	68666	FALSE
Cholelithiasis and cholecystitis	digestive	574	0.296889	2102	66182	FALSE
Diseases and other conditions of the tongue	digestive	529	0.297806	177	65957	FALSE
Hemorrhoids	circulatory system	455	0.298499	1229	55271	FALSE
Glossitis	digestive	529.1	0.298694	51	65831	FALSE
Anticoagulants causing adverse effects	injuries & poisonings	964.1	0.299278	98	54485	FALSE
Chronic cystitis	genitourinary	592.12	0.299499	81	52458	FALSE
Postprocedural fever	symptoms	783.1	0.300787	100	54986	FALSE
Chronic glomerulonephritis, NOS	genitourinary	580.14	0.300844	92	53241	FALSE
Malignant neoplasm of testis	neoplasms	187.2	0.301139	112	67759	FALSE
Partial epilepsy	neurological	345.12	0.301651	1052	55407	FALSE
Hypoventilation	respiratory	513.3	0.30221	588	65523	FALSE
Unstable angina (intermediate coronary syndrome)	circulatory system	411.1	0.302789	2303	54726	FALSE
Dysuria	genitourinary	599.3	0.304543	3093	55276	FALSE
Secondary malignant neoplasm	neoplasms	198	0.305384	6574	59314	FALSE
Purpura and other hemorrhagic conditions	hematopoietic	287	0.305661	3732	58761	FALSE
Juvenile osteochondrosis	musculoskeletal	732.1	0.307062	97	57816	FALSE
Chromosomal anomalies	congenital anomalies	758.1	0.310274	372	68041	FALSE
Pemphigus and pemphigoid	dermatologic	695.22	0.311438	33	60301	FALSE
Concussion	injuries & poisonings	817	0.311852	127	67800	FALSE
Aneurysm of iliac artery	circulatory system	442.2	0.312323	61	58160	FALSE
Villonodular synovitis	musculoskeletal	741.6	0.313136	26	59038	FALSE
Nervous system congenital anomalies	congenital anomalies	752	0.313255	533	69156	FALSE
Hammer toe (acquired)	musculoskeletal	735.21	0.313567	648	62024	FALSE
Nephritis and nephropathy in diseases classified elsewhere	genitourinary	580.31	0.313657	370	53519	FALSE
Glaucoma	sense organs	365	0.31402	1662	65766	FALSE
Anterior pituitary disorders	endocrine/metabolic	253.4	0.314439	218	61058	FALSE
Other disorders of pancreatic internal secretion	endocrine/metabolic	251	0.315289	324	61164	FALSE
Other specified disorders of breast	genitourinary	613.8	0.315326	399	66950	FALSE
Congenital anomalies of skin	dermatologic	691	0.315866	200	60468	FALSE
Stiffness of joint	musculoskeletal	741.2	0.315984	1452	60464	FALSE
Melanomas of skin, dx or hx	neoplasms	172.1	0.316681	1461	60981	FALSE
Dementia with cerebral degenerations	mental disorders	290.12	0.316852	113	56643	FALSE
Urinary complications NEC	genitourinary	597.2	0.316877	155	63546	FALSE
Adverse drug events and drug allergies	injuries & poisonings	979	0.317566	1495	55882	FALSE
Thrombocytopenia	hematopoietic	287.3	0.319725	3564	58593	FALSE
Ovarian cyst	genitourinary	628	0.320187	845	59464	FALSE
Pyoderma	dermatologic	686.5	0.320321	56	58683	FALSE
Arthropathy associated with neurological disorders	musculoskeletal	713.5	0.32074	163	58271	FALSE
Corneal ulcer	sense organs	370.1	0.321004	143	61266	FALSE
Encounter for long-term (current) use of antiplatelets/antithrombotics	circulatory system	457.2	0.321239	446	54488	FALSE
Anomalous atrioventricular excitation	circulatory system	426.4	0.321386	113	44564	FALSE
Abnormal findings on mammogram or breast exam	genitourinary	611	0.321457	2680	65951	FALSE
Kyphoscoliosis and scoliosis	musculoskeletal	737.3	0.323622	1043	62419	FALSE
Benign neoplasm of brain and other parts of nervous system	neoplasms	225	0.323734	529	68385	FALSE
Dermatomyositis	dermatologic	709.5	0.323984	129	59513	FALSE
Squamous cell carcinoma	neoplasms	172.22	0.323986	869	60389	FALSE
Uveitis, noninfectious or NOS	sense organs	371.1	0.32439	277	61400	FALSE
Wheezing	respiratory	512.1	0.324716	1129	38179	FALSE
Hypersomnia	neurological	327.1	0.32731	314	54315	FALSE
Cardiac conduction disorders	circulatory system	426	0.328941	4378	48829	FALSE
Acquired acanthosis nigricans	dermatologic	701.6	0.329325	70	63141	FALSE
Nonspecific elevation of levels of transaminase or lactic acid dehydrogenase [LDH]	digestive	573.6	0.329463	376	57006	FALSE
Epilepsy	neurological	345.1	0.33061	1566	55921	FALSE
severe protein-calorie malnutrition	endocrine/metabolic	260.2	0.330916	1676	52429	FALSE
Benign neoplasm of eye	neoplasms	224	0.331242	213	68069	FALSE
Oral aphthae	digestive	528.12	0.33139	97	65877	FALSE
Spondylosis with myelopathy	musculoskeletal	721.2	0.331654	418	56721	FALSE
Glomerulonephritis	genitourinary	580.1	0.331755	310	53459	FALSE
Benign neoplasm of breast	genitourinary	610.4	0.334928	216	63487	FALSE
Disease of tricuspid valve	circulatory system	394.7	0.335718	946	58436	FALSE
Loss of height	symptoms	781.1	0.336147	34	67493	FALSE
Phlebitis and thrombophlebitis	circulatory system	451	0.33628	352	54394	FALSE
Chronic prostatitis	genitourinary	601.12	0.337733	94	63038	FALSE
Schizophrenia and other psychotic disorders	mental disorders	295	0.338337	858	44538	FALSE
Opiates and related narcotics causing adverse effects in therapeutic use	injuries & poisonings	965.1	0.338777	708	55095	FALSE
Nephritis and nephropathy without mention of glomerulonephritis	genitourinary	580.3	0.340521	634	53783	FALSE
Vitamin D deficiency	endocrine/metabolic	261.4	0.340527	5160	55913	FALSE
Autoimmune hemolytic anemias	hematopoietic	283.1	0.340561	69	46485	FALSE
Eye infection, viral	sense organs	369.2	0.341092	177	61300	FALSE
Ischemic Heart Disease	circulatory system	411	0.341438	11077	63500	FALSE
Rotator cuff (capsule) sprain	injuries & poisonings	840.2	0.342439	537	62308	FALSE
Pyogenic granuloma	dermatologic	686.4	0.342805	56	58683	FALSE
Optic neuritis/neuropathy	sense organs	377.3	0.343176	230	61418	FALSE
Infestation (lice, mites)	infectious diseases	132	0.343876	94	68027	FALSE
Dependence on respirator [Ventilator] or supplemental oxygen	respiratory	509.8	0.344823	1112	50371	FALSE
Open wound of lip and mouth	injuries & poisonings	870.5	0.344828	82	62499	FALSE
Obstructive sleep apnea	neurological	327.32	0.345779	5084	59085	FALSE
Contusion	injuries & poisonings	916	0.345803	991	65619	FALSE
Anterior horn cell disease	neurological	334.2	0.346105	100	54455	FALSE
Acute cystitis	genitourinary	592.11	0.346277	579	52956	FALSE
Congenital deficiency of other clotting factors (including factor VII)	hematopoietic	286.12	0.346378	84	55113	FALSE
Disorders of conjunctiva	sense organs	372	0.347015	227	61350	FALSE
Respiratory abnormalities	respiratory	513	0.347232	1666	66601	FALSE
Keratoconjunctivitis	sense organs	370.3	0.349811	558	61681	FALSE
Diabetes type 2 with peripheral circulatory disorders	endocrine/metabolic	250.25	0.350684	477	54673	FALSE
Candidiasis of skin and nails	infectious diseases	112.3	0.351898	254	61105	FALSE
Spontaneous ecchymoses	hematopoietic	287.1	0.352891	149	55178	FALSE
Infusion and transfusion reaction	injuries & poisonings	942	0.352896	71	56349	FALSE
Inflammation of the eye	sense organs	371	0.35338	2031	63154	FALSE
Chronic ulcer of leg or foot	dermatologic	707.2	0.35374	868	67644	FALSE
Angiodysplasia of intestine (without mention of hemorrhage)	digestive	556.11	0.35512	45	48344	FALSE
Palpitations	circulatory system	427.9	0.355432	4969	49420	FALSE
Microscopic hematuria	genitourinary	593.2	0.355856	451	52828	FALSE
Benign neoplasm of brain, cranial nerves, meninges	neoplasms	225.1	0.355883	481	68337	FALSE
Pancreatic cancer	neoplasms	157	0.356547	645	62425	FALSE
Streptococcus infection	infectious diseases	041.2	0.357377	1262	59965	FALSE
Ill-defined descriptions and complications of heart disease	circulatory system	429	0.357474	1209	58456	FALSE
Other acute and subacute forms of ischemic heart disease	circulatory system	411.9	0.357672	109	52532	FALSE
Acute bronchitis and bronchiolitis	respiratory	483	0.358551	2673	56812	FALSE
Polyp of corpus uteri	genitourinary	622.1	0.358643	234	69290	FALSE
Basal cell carcinoma	neoplasms	172.21	0.359913	1081	60601	FALSE
Hirsutism	dermatologic	704.2	0.360094	139	65558	FALSE
Irritable Bowel Syndrome	digestive	564.1	0.360607	1621	49920	FALSE
Dermatomycoses	infectious diseases	110.2	0.361231	106	60957	FALSE
Systemic lupus erythematosus	dermatologic	695.42	0.362311	916	59788	FALSE
Calculus of kidney	genitourinary	594.1	0.36272	2278	66461	FALSE
Anomalies of jaw size/symmetry	digestive	526.3	0.362763	110	64806	FALSE
Disorders of adrenal glands	endocrine/metabolic	255	0.362973	1253	62093	FALSE
Paroxysmal ventricular tachycardia	circulatory system	427.12	0.364041	1696	46147	FALSE
Aneurysm of other specified artery	circulatory system	442.8	0.364938	153	58252	FALSE
Megaloblastic anemia	hematopoietic	281.1	0.365045	822	47238	FALSE
Other disorders of prostate	genitourinary	602	0.365289	86	63030	FALSE
Secondary malignant neoplasm of liver	neoplasms	198.4	0.366064	1919	54659	FALSE
Benign neoplasm of colon	neoplasms	208	0.366233	3071	63385	FALSE
Other disorders of stomach and duodenum	digestive	537	0.36662	980	61671	FALSE
Acute pharyngitis	respiratory	465.2	0.367205	2986	55190	FALSE
Other specified peripheral vascular diseases	circulatory system	443.8	0.367393	153	58252	FALSE
Injuries to the nervous system	injuries & poisonings	907	0.367725	310	69770	FALSE
Paraproteinemia	endocrine/metabolic	270.32	0.369094	370	66611	FALSE
Poisoning by anticonvulsants and anti-Parkinsonism drugs	injuries & poisonings	966	0.370605	38	54425	FALSE
Secondary/extrinsic cardiomyopathies	circulatory system	425.2	0.37271	937	64778	FALSE
Disturbances of sulphur-bearing amino-acid metabolism	endocrine/metabolic	270.11	0.3744	29	66270	FALSE
Digestive congenital anomalies	congenital anomalies	750	0.37489	484	66742	FALSE
Obstruction of bile duct	digestive	575.2	0.375082	490	64570	FALSE
Chorioretinal inflammations, scars, and other disorders of choroid	sense organs	363	0.376241	210	64314	FALSE
Parkinson's disease	neurological	332	0.376821	567	54922	FALSE
Postoperative infection	infectious diseases	080	0.376888	1546	67042	FALSE
Diseases of esophagus	digestive	530	0.377423	13598	57917	FALSE
Superficial cellulitis and abscess	dermatologic	681	0.378093	4764	63391	FALSE
Conjunctivitis, noninfectious	sense organs	371.2	0.378826	1125	62248	FALSE
Congenital anomalies of face and neck	congenital anomalies	749	0.379218	416	69455	FALSE
Benign neoplasm of bone and articular cartilage	neoplasms	213	0.379533	181	55102	FALSE
Disorders of muscle, ligament, and fascia	musculoskeletal	728	0.38041	197	54225	FALSE
Hypertension	circulatory system	401	0.38379	26908	64028	FALSE
Type 1 diabetes	endocrine/metabolic	250.1	0.383929	2192	56388	FALSE
Ptosis of eyelid	sense organs	374.3	0.384782	403	61526	FALSE
Shortness of breath	respiratory	512.7	0.384933	12470	49520	FALSE
Other specified congenital anomalies of kidney	congenital anomalies	751.22	0.385047	213	66471	FALSE
Valvular heart disease/ heart chambers	congenital anomalies	747.12	0.385455	796	66618	FALSE
Infertility, female	genitourinary	626.8	0.386206	147	58766	FALSE
Occlusion and stenosis of precerebral arteries	circulatory system	433.1	0.386736	1964	61203	FALSE
Symptoms involving digestive system	digestive	561	0.386989	2962	51261	FALSE
Pityriasis	dermatologic	696.3	0.387351	22	60290	FALSE
Failure to thrive (childhood)	endocrine/metabolic	264.2	0.387355	898	51651	FALSE
Back pain	symptoms	760	0.387637	10494	62643	FALSE
Intestinal infection	infectious diseases	008	0.387853	1157	68442	FALSE
Type 2 diabetes	endocrine/metabolic	250.2	0.388574	9876	64072	FALSE
Myasthenia gravis	neurological	358.1	0.389444	138	63224	FALSE
Retinal edema	sense organs	362.9	0.389458	234	63842	FALSE
Hepatitis NOS	infectious diseases	070.9	0.390614	384	57801	FALSE
Anomalies of respiratory system, congenital	congenital anomalies	748	0.391089	279	69318	FALSE
Nonspecific abnormal findings on radiological and other examination of skull and head	neurological	346.1	0.391967	120	54475	FALSE
Other disorders of biliary tract	digestive	575.8	0.394275	664	64744	FALSE
Swelling, mass, or lump in head and neck [Space-occupying lesion, intracranial NOS]	mental disorders	293.1	0.395251	1560	67123	FALSE
Cancer of esophagus	neoplasms	150	0.395415	434	62214	FALSE
Myocarditis	circulatory system	420.1	0.398032	41	63882	FALSE
Papanicolaou smear of cervix or vagina with atypical squamous cells	genitourinary	792.1	0.398434	1071	62974	FALSE
Orthostatic hypotension	circulatory system	458.1	0.399153	994	58719	FALSE
Disorders of acoustic nerve	sense organs	389.5	0.399461	29	62110	FALSE
Dermatophytosis / Dermatomycosis	infectious diseases	110	0.400082	1978	62829	FALSE
Essential hypertension	circulatory system	401.1	0.400715	26464	63584	FALSE
Fibroadenosis of breast	genitourinary	610.2	0.401572	46	63317	FALSE
Intracranial hemorrhage (injury)	injuries & poisonings	818	0.402024	369	68042	FALSE
Cutaneous lupus erythematosus	dermatologic	695.41	0.404777	178	59050	FALSE
Hemorrhage of fetus or newborn	pregnancy complications	656.4	0.40547	128	68807	FALSE
Poisoning by agents primarily affecting blood constituents	injuries & poisonings	964	0.405721	103	54490	FALSE
Poisoning by agents primarily affecting the cardiovascular system	injuries & poisonings	972	0.405987	180	54567	FALSE
Cancer of kidney and renal pelvis	neoplasms	189.1	0.406447	980	69000	FALSE
Chronic ulcer of skin	dermatologic	707	0.406817	1669	68445	FALSE
Benign neoplasm of other female genital organs	neoplasms	221	0.408554	54	61358	FALSE
Osteoarthrosis, localized, secondary	musculoskeletal	740.12	0.409205	164	55150	FALSE
Precordial pain	circulatory system	418.1	0.409235	1052	47380	FALSE
Keratoconjunctivitis sicca	sense organs	370.31	0.409559	484	61607	FALSE
Cerebral aneurysm	circulatory system	433.5	0.410305	401	59640	FALSE
Syncope and collapse	symptoms	788	0.411873	4088	67177	FALSE
Abnormal heart sounds	circulatory system	396	0.412099	1406	58896	FALSE
Osteoarthrosis, localized, primary	musculoskeletal	740.11	0.413288	4869	59855	FALSE
Arthropathy associated with infections	musculoskeletal	711	0.413925	393	58501	FALSE
Aphakia and other disorders of lens	sense organs	379.3	0.41442	91	61279	FALSE
Thyroid cancer	neoplasms	193	0.414579	635	68777	FALSE
Conductive hearing loss	sense organs	389.2	0.415048	701	62782	FALSE
Dizziness and giddiness (Light-headedness and vertigo)	sense organs	386.9	0.415111	4516	64600	FALSE
Curvature of spine	musculoskeletal	737	0.415755	1179	62555	FALSE
Glucocorticoid deficiency	endocrine/metabolic	255.21	0.415765	751	61591	FALSE
Congenital anomalies of upper limb, including shoulder girdle	congenital anomalies	755.4	0.420777	58	68023	FALSE
Placenta previa and abruptio placenta	pregnancy complications	635.3	0.420915	117	67525	FALSE
Secondary hypothyroidism	endocrine/metabolic	244.1	0.421802	1585	57947	FALSE
Infections specific to the perinatal period	pregnancy complications	657	0.422367	121	70083	FALSE
Pyogenic arthritis	musculoskeletal	711.1	0.422371	293	58401	FALSE
Cerebral edema and compression of brain	neurological	348.2	0.42246	1095	55450	FALSE
Spondylolisthesis, congenital	congenital anomalies	754.2	0.423747	117	68082	FALSE
Tics and choreas	neurological	333.3	0.423881	68	54423	FALSE
Pneumonia due to fungus (mycoses)	respiratory	480.3	0.423985	164	54303	FALSE
Lymphoid leukemia, chronic	neoplasms	204.12	0.424747	197	67415	FALSE
Nontraumatic compartment syndrome	musculoskeletal	729.7	0.426182	40	54068	FALSE
Acute posthemorrhagic anemia	hematopoietic	285.1	0.426889	4791	51207	FALSE
Other forms of chronic heart disease	circulatory system	414	0.427078	2524	54947	FALSE
Septic shock	injuries & poisonings	994.21	0.429123	1458	65424	FALSE
Malignant neoplasm of other urinary organs	neoplasms	189.4	0.429306	352	68372	FALSE
Cardiomyopathy	circulatory system	425	0.429693	2843	66684	FALSE
Shock	symptoms	797	0.430128	1488	68896	FALSE
Infertility, female, associated with anovulation	genitourinary	626.15	0.430608	29	58648	FALSE
Type 1 diabetes with renal manifestations	endocrine/metabolic	250.12	0.431115	300	54496	FALSE
Infections of genitourinary tract during pregnancy	pregnancy complications	647.1	0.431254	161	69640	FALSE
Infection/inflammation of internal prosthetic device; implant; and graft	infectious diseases	081	0.431761	1477	66973	FALSE
Arterial embolism and thrombosis of lower extremity artery	circulatory system	444.1	0.432637	198	58297	FALSE
Retinal hemorrhage/ischemia	sense organs	362.8	0.434722	94	63702	FALSE
Rosacea	dermatologic	695.3	0.435121	728	60996	FALSE
Symptoms and disorders of the joints	musculoskeletal	741	0.435335	3942	62954	FALSE
Malignant neoplasm of head, face, and neck	neoplasms	195.3	0.435863	1153	53893	FALSE
Abnormal involuntary movements	neurological	350.1	0.435878	1554	63527	FALSE
Disorders of diaphragm	respiratory	513.8	0.436414	240	65175	FALSE
Sarcoidosis	dermatologic	697	0.437524	274	60542	FALSE
Disturbances in tooth eruption	digestive	520.2	0.437559	355	65051	FALSE
Progressive myopia	sense organs	360.2	0.437676	112	64216	FALSE
Endometrial hyperplasia	genitourinary	621	0.437885	141	69197	FALSE
Hyperosmolality and/or hypernatremia	endocrine/metabolic	276.11	0.43915	725	47271	FALSE
Unspecified diffuse connective tissue disease	dermatologic	709.7	0.439431	177	59561	FALSE
Type 2 diabetes with neurological manifestations	endocrine/metabolic	250.24	0.439822	2175	56371	FALSE
Other symptoms of respiratory system	respiratory	512	0.440065	20995	58045	FALSE
Nonspecific chest pain	circulatory system	418	0.440474	14386	60714	FALSE
Meningitis	neurological	320	0.4412	300	69368	FALSE
Type 1 diabetes with ketoacidosis	endocrine/metabolic	250.11	0.442584	300	54496	FALSE
Open wound of nose and sinus	injuries & poisonings	870.4	0.442892	30	62447	FALSE
Dyshidrosis	dermatologic	705.1	0.442983	132	63508	FALSE
Malignant neoplasm of bladder	neoplasms	189.21	0.443862	825	68845	FALSE
Benign neoplasm of ovary	neoplasms	220	0.444275	247	61768	FALSE
Disturbances of amino-acid transport	endocrine/metabolic	270.1	0.444894	96	66337	FALSE
Carcinoid syndrome	endocrine/metabolic	259.2	0.445005	83	60923	FALSE
Disorders of phosphorus metabolism	endocrine/metabolic	275.53	0.44514	795	63485	FALSE
Cancer of other female genital organs	neoplasms	184	0.445222	690	64397	FALSE
Obstructive genitourinary defect	congenital anomalies	751.3	0.445904	163	66421	FALSE
Rheumatic disease of the heart valves	circulatory system	394	0.446339	1596	59086	FALSE
Rupture of synovium	musculoskeletal	727.5	0.446758	127	54155	FALSE
Other and unspecified disorders of the nervous system	neurological	349	0.447114	430	54785	FALSE
Other hypertensive complications	circulatory system	401.3	0.447501	1608	38728	FALSE
Chronic pancreatitis	digestive	577.2	0.449392	323	68160	FALSE
Subjective visual disturbances	sense organs	368.9	0.450167	428	65396	FALSE
Myoclonus	neurological	333.2	0.450228	183	54538	FALSE
Stricture and stenosis of esophagus	digestive	530.3	0.451186	644	44963	FALSE
Other persistent mental disorders due to conditions classified elsewhere	mental disorders	290.3	0.451364	678	57208	FALSE
Lack of coordination	neurological	350.3	0.453229	1395	63368	FALSE
Open-angle glaucoma	sense organs	365.1	0.453234	1102	65206	FALSE
Disorders of uterus, NEC	genitourinary	619.2	0.455417	318	66635	FALSE
Abnormal weight gain	endocrine/metabolic	278.4	0.457606	1428	55535	FALSE
Unequal leg length (acquired)	musculoskeletal	736.6	0.457702	90	61466	FALSE
Chronic laryngitis	respiratory	473.1	0.458952	205	49566	FALSE
Other disorders of liver	digestive	573	0.459452	1832	58462	FALSE
Vitamin deficiency	endocrine/metabolic	261	0.461332	6163	56916	FALSE
Atrial fibrillation and flutter	circulatory system	427.2	0.461395	6772	51223	FALSE
Postmenopausal bleeding	genitourinary	627.1	0.46168	575	59194	FALSE
Hyperhidrosis	dermatologic	705.8	0.463986	277	63653	FALSE
Otitis media and Eustachian tube disorders	sense organs	381	0.464284	3292	64673	FALSE
Other disorders of bone and cartilage	musculoskeletal	733	0.465144	1364	59083	FALSE
Intestinal infection due to C. difficile	infectious diseases	008.52	0.465368	744	68029	FALSE
Known or suspected fetal abnormality affecting management of mother	pregnancy complications	655	0.465659	1779	69245	FALSE
Coronary atherosclerosis	circulatory system	411.4	0.466001	10053	62476	FALSE
Anal and rectal conditions	digestive	565	0.466386	1609	60194	FALSE
Chronic pharyngitis and nasopharyngitis	respiratory	472	0.466881	1743	51104	FALSE
Mixed hyperlipidemia	endocrine/metabolic	272.13	0.466917	9742	55226	FALSE
Spirochetal infection	infectious diseases	130	0.467232	51	67984	FALSE
Neurological disorders	mental disorders	292	0.467303	6407	62937	FALSE
Hypopotassemia	endocrine/metabolic	276.14	0.4677	5876	52422	FALSE
Atrial fibrillation	circulatory system	427.21	0.468559	6586	51037	FALSE
Sepsis and SIRS	injuries & poisonings	994	0.469448	4647	68613	FALSE
Type 1 diabetes with ophthalmic manifestations	endocrine/metabolic	250.13	0.469734	273	54469	FALSE
Ingrowing nail	dermatologic	703.1	0.4702	511	65930	FALSE
Disorders of menstruation and other abnormal bleeding from female genital tract	genitourinary	626	0.470374	2664	61283	FALSE
Separation of retinal layers	sense organs	362.31	0.470633	52	63660	FALSE
Lupus (localized and systemic)	dermatologic	695.4	0.471727	976	59848	FALSE
Respiratory conditions of fetus and newborn	pregnancy complications	656.2	0.472807	613	69292	FALSE
Sleep disorders	neurological	327	0.473694	5694	59695	FALSE
Need for Hormone replacement therapy (postmenopausal)	genitourinary	627.22	0.474047	406	59025	FALSE
Cancer of bladder	neoplasms	189.2	0.474819	835	68855	FALSE
Other peripheral nerve disorders	neurological	351	0.475586	2884	64106	FALSE
Other allied disorders of spine	musculoskeletal	721.8	0.475601	39	56342	FALSE
Other paralytic syndromes	neurological	344	0.476549	563	54918	FALSE
Other hypertrophic and atrophic conditions of skin	dermatologic	701	0.477231	2303	65374	FALSE
Delirium due to conditions classified elsewhere	mental disorders	290.2	0.477433	626	57156	FALSE
Epistaxis or throat hemorrhage	respiratory	477	0.478178	770	50131	FALSE
Acute pulmonary heart disease	circulatory system	415.1	0.479581	1394	59132	FALSE
Hemorrhage NOS	circulatory system	459.1	0.479612	242	57967	FALSE
Allergic reaction to food	injuries & poisonings	930	0.484062	550	56828	FALSE
Abnormal findings on examination of urine	genitourinary	598	0.484839	418	69850	FALSE
Viral Enteritis	infectious diseases	008.6	0.484998	250	67535	FALSE
Breast disorder NOS	genitourinary	613.9	0.485703	49	66600	FALSE
Abnormal findings examination of lungs	respiratory	514	0.485989	2519	66633	FALSE
Cholangitis	digestive	575.1	0.486037	341	64421	FALSE
Amblyopia	sense organs	368.1	0.487379	216	65184	FALSE
Pulmonary embolism and infarction, acute	circulatory system	415.11	0.487595	1247	58985	FALSE
Abnormality in fetal heart rate or rhythm	pregnancy complications	655.1	0.488962	746	68212	FALSE
Cramp of limb	symptoms	771.2	0.492767	175	62173	FALSE
Other perinatal conditions of fetus or newborn	pregnancy complications	656	0.493696	990	69669	FALSE
Aortic valve disease	circulatory system	394.3	0.494973	26	57516	FALSE
Other and nonspecific abnormal cytological, histological and immunological findings	symptoms	795	0.4955	55	70183	FALSE
Symptoms of the muscles	symptoms	772	0.495677	357	61976	FALSE
Insulins and antidiabetic agents causing adverse effects in therapeutic use	injuries & poisonings	962.2	0.497029	41	54428	FALSE
Other specified nonpsychotic and/or transient mental disorders	mental disorders	291	0.497374	2488	59018	FALSE
Intestinal malabsorption (non-celiac)	digestive	557	0.497389	409	48708	FALSE
Keratitis	sense organs	370	0.498032	788	61911	FALSE
Chondromalacia	musculoskeletal	733.9	0.498062	92	57811	FALSE
Rheumatoid arthritis	musculoskeletal	714.1	0.498337	1716	61410	FALSE
Chronic Kidney Disease, Stage III	genitourinary	585.33	0.500087	2903	56052	FALSE
Herpes zoster with nervous system complications	infectious diseases	053.1	0.501003	147	57564	FALSE
Bipolar	mental disorders	296.1	0.501377	1840	45520	FALSE
Intervertebral disc disorders	musculoskeletal	722	0.501587	4351	60654	FALSE
Malignant neoplasm of renal pelvis	neoplasms	189.12	0.505191	179	68199	FALSE
Diseases of the jaws	digestive	526	0.505291	662	65358	FALSE
Secondary thrombocytopenia	hematopoietic	287.32	0.505766	602	55631	FALSE
Von willebrand's disease	hematopoietic	286.11	0.506127	95	55124	FALSE
Regional enteritis	digestive	555.1	0.507602	2103	50402	FALSE
Learning disorder	mental disorders	315.1	0.508356	62	65269	FALSE
Benign neoplasm of parathyroid gland	neoplasms	227.2	0.509079	71	68213	FALSE
Venous/cerebrovascular complications embolism in pregnancy and the puerperium	pregnancy complications	671	0.509616	76	70026	FALSE
stress incontinence, female	genitourinary	624.9	0.51023	926	66252	FALSE
Phlebitis and thrombophlebitis of intracranial venous sinuses	neurological	325	0.510293	61	69129	FALSE
Mammographic microcalcification	genitourinary	611.11	0.510832	523	63794	FALSE
Congenital anomalies of great vessels	congenital anomalies	747.13	0.512904	675	66497	FALSE
Atrial flutter	circulatory system	427.22	0.51352	1929	46380	FALSE
Asthma with exacerbation	respiratory	495.2	0.514257	892	56250	FALSE
Frequency of urination and polyuria	genitourinary	599.5	0.514407	2987	55170	FALSE
Malignant neoplasm of kidney, except pelvis	neoplasms	189.11	0.515067	881	68901	FALSE
Perinatal jaundice	pregnancy complications	656.8	0.515904	326	69005	FALSE
Gram negative septicemia	infectious diseases	038.1	0.516916	837	59540	FALSE
Other hemoglobinopathies	hematopoietic	282.8	0.517353	44	46460	FALSE
Malignant neoplasm of ovary	neoplasms	184.11	0.519034	439	64146	FALSE
Irregular menstrual cycle	genitourinary	626.13	0.519541	931	59550	FALSE
Malignant neoplasm of unspecified male genital organ	neoplasms	187.1	0.519621	40	67687	FALSE
Anxiety disorders	mental disorders	300	0.520245	9423	53103	FALSE
Conduct disorders	mental disorders	312	0.521377	468	65675	FALSE
Cancer of eye	neoplasms	190	0.521863	116	67972	FALSE
Peripheral angiopathy in diseases classified elsewhere	circulatory system	443.7	0.522306	168	58267	FALSE
Cancer of intrathoracic organs	neoplasms	164	0.522353	116	67001	FALSE
Other anemias	hematopoietic	285	0.522682	13577	59993	FALSE
Congestive heart failure (CHF) NOS	circulatory system	428.1	0.522966	5641	62888	FALSE
Other disorders of neurohypophysis	endocrine/metabolic	253.7	0.523357	102	60942	FALSE
Chronic hepatitis	infectious diseases	070.4	0.523383	300	57717	FALSE
Cardiac shunt/ heart septal defect	congenital anomalies	747.11	0.523626	1541	67363	FALSE
Other disorders of soft tissues	musculoskeletal	729	0.523998	2026	56054	FALSE
Cancer of other male genital organs	neoplasms	187	0.525081	163	67810	FALSE
Eosinophilia	hematopoietic	288.3	0.52577	219	52880	FALSE
Acute renal failure	genitourinary	585.1	0.527002	7277	60426	FALSE
Secondary malignancy of respiratory organs	neoplasms	198.2	0.527155	2292	55032	FALSE
Hemiplegia	neurological	342	0.527534	574	54929	FALSE
Fracture of patella	injuries & poisonings	800.4	0.527573	294	58350	FALSE
Early or threatened labor; hemorrhage in early pregnancy	pregnancy complications	636	0.528161	1222	68630	FALSE
Fracture of ankle and foot	injuries & poisonings	801	0.528852	1554	59610	FALSE
Benign mammary dysplasias	genitourinary	610	0.528864	1197	64468	FALSE
Primary angle-closure glaucoma	sense organs	365.2	0.528903	194	64298	FALSE
Other disorders of middle ear and mastoid	sense organs	385	0.528944	189	61570	FALSE
Lymphoid leukemia	neoplasms	204.1	0.529133	324	67542	FALSE
Acute inflammatory pelvic disease	genitourinary	614.31	0.529386	21	66095	FALSE
Flat foot	musculoskeletal	735.1	0.529872	252	61628	FALSE
Chorioretinal scars	sense organs	363.3	0.530111	128	64232	FALSE
Cardiac pacemaker in situ	circulatory system	426.91	0.531248	1704	46155	FALSE
Vertiginous syndromes and other disorders of vestibular system	sense organs	386	0.531268	1027	61111	FALSE
Dysphagia	digestive	532	0.531297	5147	49466	FALSE
Encounter for long-term (current) use of anticoagulants, antithrombotics, aspirin	circulatory system	457	0.531438	1541	55583	FALSE
Mastodynia	genitourinary	613.5	0.531855	580	67131	FALSE
Other degenerative diseases of the basal ganglia	neurological	333.8	0.532399	98	54453	FALSE
Hyposmolality and/or hyponatremia	endocrine/metabolic	276.12	0.532556	3775	50321	FALSE
Other retinal disorders	sense organs	362	0.532798	2027	65635	FALSE
Symptoms involving respiratory system and other chest symptoms	respiratory	519.9	0.533094	1821	64995	FALSE
Non-Hodgkins lymphoma	neoplasms	202.2	0.533384	443	67661	FALSE
Other deficiency anemia	hematopoietic	281	0.533502	1123	47539	FALSE
Obsessive-compulsive disorders	mental disorders	300.3	0.533764	439	44119	FALSE
Peritonitis and retroperitoneal infections	digestive	567	0.534329	1125	59710	FALSE
Psychosis	mental disorders	295.3	0.534922	532	44212	FALSE
Degenerative disease of the spinal cord	neurological	334	0.535365	640	54995	FALSE
Left bundle branch block	circulatory system	426.32	0.535416	653	45104	FALSE
Macular degeneration (senile) of retina NOS	sense organs	362.29	0.53551	399	64007	FALSE
Multiple myeloma	neoplasms	204.4	0.535625	228	67446	FALSE
Chronic inflammatory pelvic disease	genitourinary	614.32	0.536082	115	66189	FALSE
Human immunodeficiency virus [HIV] disease	infectious diseases	071	0.537543	713	58130	FALSE
Gastroesophageal laceration-hemorrhage syndrome	digestive	530.7	0.537798	45	44364	FALSE
Gastrojejunal ulcer	digestive	531.5	0.538494	48	66827	FALSE
Myocardial infarction	circulatory system	411.2	0.538769	3677	56100	FALSE
Leukoplakia of oral mucosa	digestive	528.6	0.539764	59	65839	FALSE
Cleft palate	congenital anomalies	749.1	0.539834	67	58521	FALSE
Personal history of diseases of blood and blood-forming organs	hematopoietic	289.3	0.540136	258	52919	FALSE
Carcinoma in situ of skin	neoplasms	172.3	0.540866	356	59876	FALSE
Chronic passive congestion of liver	digestive	573.1	0.541732	54	56684	FALSE
Diseases of the salivary glands	digestive	527	0.542803	665	66445	FALSE
Protozoan infection	infectious diseases	131	0.54391	30	67963	FALSE
Retinal detachments and defects	sense organs	361	0.544033	377	64481	FALSE
Septicemia	infectious diseases	038	0.545001	5472	64175	FALSE
Hypoglycemia	endocrine/metabolic	251.1	0.545305	592	49465	FALSE
Chronic venous hypertension	circulatory system	453	0.546061	20	54062	FALSE
Poisoning by analgesics, antipyretics, and antirheumatics	injuries & poisonings	965	0.54645	523	54910	FALSE
Inflammatory diseases of uterus, except cervix	genitourinary	614.4	0.547749	30	66104	FALSE
Deficiency anemias	hematopoietic	281.9	0.547809	256	46672	FALSE
Hepatomegaly	digestive	573.3	0.548532	307	56937	FALSE
Hypoparathyroidism	endocrine/metabolic	252.2	0.549517	119	60959	FALSE
Pulmonary congestion and hypostasis	respiratory	503	0.549656	1965	51224	FALSE
Angina pectoris	circulatory system	411.3	0.550934	2508	54931	FALSE
Acquired toe deformities	musculoskeletal	735.2	0.551686	870	62246	FALSE
Cystic mastopathy	genitourinary	610.1	0.551686	989	64260	FALSE
Alteration of consciousness	mental disorders	291.8	0.551963	2169	58699	FALSE
Personal history of diseases of digestive system	digestive	564.9	0.552323	155	48454	FALSE
Bacterial infection NOS	infectious diseases	041	0.552768	5429	64132	FALSE
E. coli	infectious diseases	041.4	0.553912	1238	59941	FALSE
Pallor and flushing	symptoms	782.6	0.554014	298	58464	FALSE
Other non-epithelial cancer of skin	neoplasms	172.2	0.556122	3842	63362	FALSE
Congenital anomalies of female genital organs	congenital anomalies	751.11	0.557095	82	66340	FALSE
Mental retardation	mental disorders	315.3	0.55864	394	65601	FALSE
HIV infection, symptomatic	infectious diseases	071.1	0.559463	702	58119	FALSE
Cough	respiratory	512.8	0.560319	9991	47041	FALSE
Pain, swelling or discharge of eye	sense organs	379.9	0.561657	232	61420	FALSE
Type 2 diabetes with renal manifestations	endocrine/metabolic	250.22	0.5622	1618	55814	FALSE
Allergic conjunctivitis	sense organs	371.21	0.562315	1053	62176	FALSE
Bacterial enteritis	infectious diseases	008.5	0.563192	793	68078	FALSE
Pulmonary heart disease	circulatory system	415	0.563275	3550	61288	FALSE
Other conditions of brain	neurological	348	0.563768	2560	56915	FALSE
Diverticulum of esophagus, acquired	digestive	530.6	0.564006	66	44385	FALSE
Hyperventilation	respiratory	513.4	0.564488	808	65743	FALSE
Pathologic fracture of vertebrae	musculoskeletal	743.21	0.5646	283	58757	FALSE
Hyperplasia of prostate	genitourinary	600	0.564802	2608	65552	FALSE
Other disorders of eyelids	sense organs	374	0.564992	1392	62515	FALSE
Aphasia/speech disturbance	mental disorders	292.1	0.565179	1282	57812	FALSE
Pneumococcal pneumonia	respiratory	480.11	0.566781	406	54545	FALSE
Open wound of finger(s)	injuries & poisonings	871.2	0.566911	258	62675	FALSE
Diseases of nail, NOS	dermatologic	703	0.567399	319	65738	FALSE
Splenomegaly	digestive	579.2	0.567478	872	56824	FALSE
Reticulosarcoma	neoplasms	202.22	0.568124	101	67319	FALSE
Esophagitis, GERD and related diseases	digestive	530.1	0.569022	12727	57046	FALSE
Seborrheic keratosis	dermatologic	702.2	0.569275	3267	65444	FALSE
Pulmonary collapse; interstitial and compensatory emphysema	respiratory	508	0.569764	9855	59114	FALSE
Rheumatic fever / chorea	infectious diseases	041.21	0.571281	21	58724	FALSE
Strabismus (not specified as paralytic)	sense organs	378.1	0.572677	549	61737	FALSE
Amyloidosis	endocrine/metabolic	270.33	0.573177	98	66339	FALSE
Diseases due to other mycobacteria	infectious diseases	031	0.573432	110	58813	FALSE
Primary hypercoagulable state	hematopoietic	286.81	0.574505	469	55498	FALSE
GERD	digestive	530.11	0.57485	12147	56466	FALSE
Delay in sexual development and puberty NEC	endocrine/metabolic	259.3	0.576253	79	60919	FALSE
Diseases of sebaceous glands	dermatologic	706	0.57716	2379	65755	FALSE
Plica syndrome	musculoskeletal	727.8	0.577872	98	54126	FALSE
Celiac disease	digestive	557.1	0.577952	382	48681	FALSE
Diseases of the oral soft tissues, excluding lesions specific for gingiva and tongue	digestive	528	0.577953	1357	67137	FALSE
Other disorders of circulatory system	circulatory system	459	0.578379	1051	58776	FALSE
Pathologic fracture of femur	musculoskeletal	743.22	0.579358	171	58645	FALSE
Impetigo	dermatologic	686.2	0.580587	131	58758	FALSE
Methicillin resistant Staphylococcus aureus	infectious diseases	041.12	0.581033	964	59667	FALSE
Disorders of carbohydrate transport and metabolism	endocrine/metabolic	271	0.582306	283	70096	FALSE
Viral hepatitis B	infectious diseases	070.2	0.58236	200	57617	FALSE
Coma	neurological	348.7	0.582708	228	54583	FALSE
Dysmetabolic syndrome X	endocrine/metabolic	277.7	0.582792	392	67366	FALSE
Encounter for long-term (current) use of aspirin	circulatory system	457.3	0.582908	1266	55308	FALSE
Primary thrombocytopenia	hematopoietic	287.31	0.584261	318	55347	FALSE
Asthma	respiratory	495	0.585194	4270	59628	FALSE
Synovitis and tenosynovitis	musculoskeletal	727.1	0.58548	1669	55697	FALSE
Occlusion of cerebral arteries, with cerebral infarction	circulatory system	433.11	0.587204	317	59556	FALSE
Hemorrhagic disorder due to intrinsic circulating anticoagulants	hematopoietic	286.5	0.58749	246	55275	FALSE
Pediculosis and phthirus infestation	infectious diseases	132.1	0.588109	36	67969	FALSE
Dentofacial anomalies, including malocclusion	digestive	524	0.588215	363	65059	FALSE
Disorders of bilirubin excretion	endocrine/metabolic	277.4	0.588896	205	67179	FALSE
Congenital anomaly of gallbladder, bile ducts, liver, pancreas	congenital anomalies	750.22	0.589478	110	66368	FALSE
Abnormal results of other function studies (bladder, pancreas, placenta, spleen, etc)	symptoms	794	0.590125	20	70311	FALSE
Speech and language disorder	mental disorders	315.2	0.590353	561	65768	FALSE
Bone marrow or stem cell transplant	neoplasms	860	0.590978	229	70267	FALSE
Eustachian tube disorders	sense organs	381.2	0.591482	1869	63250	FALSE
Peritoneal or intestinal adhesions	digestive	560.3	0.591654	214	48513	FALSE
Peripheral autonomic neuropathy	neurological	337.1	0.592556	128	54483	FALSE
Open wound of toe(s)	injuries & poisonings	871.4	0.592912	49	62466	FALSE
Postoperative shock	injuries & poisonings	958.1	0.593421	119	68857	FALSE
Osteoarthrosis, generalized	musculoskeletal	740.2	0.594251	2425	57411	FALSE
Mastoiditis & related conditions	sense organs	381.3	0.594573	104	61485	FALSE
Suicide or self-inflicted injury	mental disorders	297.2	0.595168	203	43883	FALSE
Hypertensive chronic kidney disease	circulatory system	401.22	0.595545	3204	40324	FALSE
Other conditions of brain, NOS	neurological	348.9	0.597011	1457	55812	FALSE
Kidney replaced by transpant	genitourinary	587	0.597011	876	54025	FALSE
Sinoatrial node dysfunction (Bradycardia)	circulatory system	427.8	0.597322	1664	46115	FALSE
Urinary calculus	genitourinary	594	0.597991	2609	66792	FALSE
Congenital osteodystrophies	congenital anomalies	756.5	0.599066	63	68028	FALSE
Dermatophytosis of the body	infectious diseases	110.13	0.599268	223	61074	FALSE
Diabetes mellitus	endocrine/metabolic	250	0.600137	10334	64530	FALSE
Infection with drug-resistant microorganisms	infectious diseases	041.9	0.600956	577	59280	FALSE
Acute osteomyelitis	musculoskeletal	710.11	0.601331	323	58431	FALSE
Chronic airway obstruction	respiratory	496	0.601535	4990	60348	FALSE
Neoplasm of unspecified nature of digestive system	neoplasms	158	0.601718	357	62137	FALSE
Disorders of fluid, electrolyte, and acid-base balance	endocrine/metabolic	276	0.602709	14512	61058	FALSE
Macular puckering of retina	sense organs	362.26	0.603475	380	63988	FALSE
Gout	endocrine/metabolic	274.1	0.604064	2095	68874	FALSE
Strabismus and other disorders of binocular eye movements	sense organs	378	0.604106	794	61982	FALSE
Allergies, other	injuries & poisonings	949	0.604412	759	57037	FALSE
Renal failure	genitourinary	585	0.604887	9902	63051	FALSE
Influenza	respiratory	481	0.605346	950	55089	FALSE
Cardiac arrest and ventricular fibrillation	circulatory system	427.4	0.60619	655	45106	FALSE
Cataplexy and narcolepsy	neurological	347	0.606248	68	54423	FALSE
Fracture of foot	injuries & poisonings	801.1	0.606655	774	58830	FALSE
Open wounds of head; neck; and trunk	injuries & poisonings	870	0.606906	1224	63641	FALSE
Cholesteatoma	sense organs	385.3	0.607854	150	61531	FALSE
Other disorders of metabolism	endocrine/metabolic	277	0.609867	905	67879	FALSE
Fasciitis	musculoskeletal	728.7	0.610504	918	54946	FALSE
Cancer of the mouth floor	neoplasms	145.5	0.611994	72	68187	FALSE
Myalgia and myositis unspecified	symptoms	770	0.612945	3441	66799	FALSE
Vaginitis and vulvovaginitis	genitourinary	614.52	0.613147	728	66802	FALSE
Emphysema	respiratory	496.1	0.615337	1317	56675	FALSE
Benign neoplasm of uterus	neoplasms	218	0.616322	622	65063	FALSE
Diseases of lips	digestive	528.5	0.616486	100	65880	FALSE
Polyarteritis nodosa	circulatory system	446.6	0.617097	60	58159	FALSE
Spondylosis and allied disorders	musculoskeletal	721	0.617367	3358	59661	FALSE
Toxic multinodular goiter	endocrine/metabolic	242.2	0.619473	129	56491	FALSE
Deep vein thrombosis [DVT]	circulatory system	452.2	0.620074	1708	55750	FALSE
Visual disturbances	sense organs	368	0.620212	1755	66723	FALSE
Nonrheumatic pulmonary valve disorders	circulatory system	395.4	0.620464	231	57721	FALSE
Other specified diseases of sebaceous glands	dermatologic	706.8	0.620687	291	63667	FALSE
Hypertension complicating pregnancy, childbirth, and the puerperium	pregnancy complications	642	0.622505	586	70032	FALSE
Keratoconus	sense organs	364.41	0.622735	36	64140	FALSE
Disturbance of salivary secretion	digestive	527.7	0.62334	493	66273	FALSE
Aneurysm of artery of lower extremity	circulatory system	442.3	0.62414	129	58228	FALSE
Pancytopenia	hematopoietic	284.1	0.625135	1239	47655	FALSE
Abnormal glucose	endocrine/metabolic	250.4	0.625699	2407	56603	FALSE
Spinocerebellar disease	neurological	334.1	0.626042	114	54469	FALSE
Disorders of magnesium metabolism	endocrine/metabolic	275.3	0.627486	1528	64218	FALSE
Disorders of copper metabolism	endocrine/metabolic	275.2	0.627525	26	62716	FALSE
Secondary hyperparathyroidism (of renal origin)	genitourinary	588.2	0.628644	395	53544	FALSE
Secondary diabetes mellitus	endocrine/metabolic	249	0.628808	497	54693	FALSE
Cardiac arrest	circulatory system	427.42	0.629961	500	44951	FALSE
Benign neoplasm of lymph nodes	neoplasms	229.1	0.630878	20	69690	FALSE
Dementias	mental disorders	290.1	0.631186	1221	57751	FALSE
Hemorrhage from gastrointestinal ulcer	digestive	531.1	0.632472	165	66944	FALSE
Cardiogenic shock	symptoms	797.1	0.634776	556	67964	FALSE
Anomalies of tooth position/malocclusion	digestive	524.3	0.634952	333	65029	FALSE
Abnormal mammogram	genitourinary	611.1	0.636825	1285	64556	FALSE
Subdural hemorrhage (injury)	injuries & poisonings	818.1	0.636941	196	67869	FALSE
Other disorders of ear	sense organs	388	0.63722	111	62192	FALSE
Cancer of major salivary glands	neoplasms	145.3	0.637849	143	68258	FALSE
Major depressive disorder	mental disorders	296.22	0.639074	4786	48466	FALSE
Diseases of hair and hair follicles	dermatologic	704	0.64185	1050	66469	FALSE
Other pulmonary inflamation or edema	respiratory	505	0.643215	433	49692	FALSE
Obstructive chronic bronchitis	respiratory	496.21	0.64355	1167	56525	FALSE
Nonspecific abnormal results of function study of brain and central nervous system	neurological	346.2	0.645178	22	54377	FALSE
Inflammatory disease of cervix, vagina, and vulva	genitourinary	614.5	0.645462	892	66966	FALSE
Endocarditis	circulatory system	420.3	0.646427	438	64279	FALSE
Agorophobia, social phobia, and panic disorder	mental disorders	300.12	0.650191	704	44384	FALSE
Cancer of urinary organs (incl. kidney and bladder)	neoplasms	189	0.651409	1703	69723	FALSE
Gout and other crystal arthropathies	endocrine/metabolic	274	0.651835	2186	68965	FALSE
Intestinal obstruction without mention of hernia	digestive	560	0.652824	2390	50689	FALSE
Dermatophytosis	infectious diseases	110.1	0.6535	1884	62735	FALSE
Other disorders of testis	genitourinary	603	0.653994	219	62113	FALSE
Postnasal drip	respiratory	475.9	0.654107	515	49876	FALSE
Postlaminectomy syndrome	musculoskeletal	722.8	0.654332	575	56878	FALSE
Cystitis and urethritis	genitourinary	592	0.654507	1177	53554	FALSE
Facial nerve disorders [CN7]	neurological	352.2	0.655163	243	61465	FALSE
Proteinuria	endocrine/metabolic	269	0.655916	1392	67633	FALSE
Upper gastrointestinal congenital anomalies	congenital anomalies	750.1	0.656327	152	66410	FALSE
Fracture of unspecified part of femur	injuries & poisonings	800.2	0.656385	436	58492	FALSE
Coagulation defects	hematopoietic	286	0.656661	2703	57732	FALSE
Hemoptysis	respiratory	516.1	0.656712	676	69626	FALSE
Intestinal disaccharidase deficiencies and disaccharide malabsorption	endocrine/metabolic	271.3	0.656713	221	70034	FALSE
Difficulty in walking	musculoskeletal	741.3	0.657277	1162	60174	FALSE
Inflammatory diseases of female pelvic organs	genitourinary	614	0.657457	1216	67290	FALSE
Pain in joint	musculoskeletal	745	0.658141	15168	60019	FALSE
Other venous embolism and thrombosis	circulatory system	452	0.658272	3176	57218	FALSE
Pruritus and related conditions	dermatologic	698	0.659347	796	68637	FALSE
Encounter for long-term (current) use of anticoagulants	hematopoietic	286.2	0.660631	4755	59784	FALSE
Painful respiration	respiratory	512.2	0.660959	864	37914	FALSE
Arteritis NOS	circulatory system	446.9	0.661886	233	58332	FALSE
Lung disease due to external agents	respiratory	500	0.661924	154	49413	FALSE
Synoviopathy	musculoskeletal	726.2	0.663129	150	54178	FALSE
Anaphylactic shock NOS	injuries & poisonings	946	0.66333	215	56493	FALSE
Hypercoagulable state	hematopoietic	286.8	0.663391	508	55537	FALSE
Conjunctivitis, infectious	sense organs	369.5	0.663913	862	61985	FALSE
Chronic pain syndrome	neurological	355.1	0.664486	1146	62368	FALSE
Osteoporosis, osteopenia and pathological fracture	musculoskeletal	743	0.665119	6437	64911	FALSE
Dry eyes	sense organs	375.1	0.666282	2534	63722	FALSE
Primary/intrinsic cardiomyopathies	circulatory system	425.1	0.666393	2546	66387	FALSE
Iatrogenic hypotension	circulatory system	458.2	0.666916	180	57905	FALSE
Acute, but ill-defined cerebrovascular disease	circulatory system	433.6	0.667378	667	59906	FALSE
Labyrinthitis	sense organs	386.3	0.668087	91	60175	FALSE
Genitourinary congenital anomalies	congenital anomalies	751	0.668726	1092	67350	FALSE
Chronic pericarditis	circulatory system	420.22	0.669543	192	64033	FALSE
Other disorders of cervical region	musculoskeletal	723	0.670821	625	56928	FALSE
Barrett's esophagus	digestive	530.13	0.67107	373	44692	FALSE
Pelvic peritoneal adhesions, female (postoperative) (postinfection)	genitourinary	614.1	0.671861	181	66255	FALSE
Respiratory arrest	respiratory	509.5	0.672313	66	49325	FALSE
Degenerative and vascular disorders of ear	sense organs	389.3	0.673596	28	62109	FALSE
Renal osteodystrophy	genitourinary	588.1	0.673862	1018	54167	FALSE
Supraventricular premature beats	circulatory system	427.61	0.67511	184	44635	FALSE
Complication due to other implant and internal device	injuries & poisonings	859	0.675653	750	61121	FALSE
Cerebral degeneration, unspecified	neurological	331.9	0.675841	247	54602	FALSE
Dyspareunia	genitourinary	625.1	0.67743	244	65570	FALSE
Abdominal aortic aneurysm	circulatory system	442.11	0.677765	712	58811	FALSE
Primary biliary cirrhosis	digestive	571.6	0.677923	248	56878	FALSE
Other diseases of lung	respiratory	510	0.679253	4731	64588	FALSE
Atrioventricular block, complete	circulatory system	426.24	0.679326	835	45286	FALSE
Sleep related leg cramps	neurological	327.72	0.680076	37	54038	FALSE
Renal colic	genitourinary	594.8	0.680159	76	64259	FALSE
Herpes simplex	infectious diseases	054	0.680536	561	57978	FALSE
Acquired hypothyroidism	endocrine/metabolic	244.2	0.680791	882	57244	FALSE
Acute rheumatic heart disease	circulatory system	394.4	0.681585	52	57542	FALSE
Lung transplant	respiratory	510.2	0.681727	206	60063	FALSE
Secondary malignant neoplasm of skin	neoplasms	198.7	0.682154	421	53161	FALSE
Stomatitis and mucositis	digestive	528.1	0.682543	692	66472	FALSE
Other disorders of synovium, tendon, and bursa	musculoskeletal	727	0.682844	3236	57264	FALSE
Secondary malignancy of bone	neoplasms	198.6	0.683753	1657	54397	FALSE
Cushing's syndrome	endocrine/metabolic	255.11	0.684033	117	60957	FALSE
Uterine leiomyoma	neoplasms	218.1	0.684036	610	65051	FALSE
Other infectious and parasitic diseases	infectious diseases	136	0.684533	445	68378	FALSE
Enthesopathy	musculoskeletal	726.1	0.684675	2846	56874	FALSE
Abnormal sputum	respiratory	516	0.68631	686	69636	FALSE
Giant cell arteritis	circulatory system	446.5	0.686666	135	58234	FALSE
Arrhythmia (cardiac) NOS	circulatory system	427.5	0.68831	3883	48334	FALSE
Dissociative disorder	mental disorders	303.1	0.688976	31	43711	FALSE
Posttraumatic wound infection not elsewhere classified	injuries & poisonings	876	0.689656	68	62485	FALSE
Acute tonsillitis	respiratory	474.1	0.689749	111	49472	FALSE
Appendiceal conditions	digestive	540	0.690269	406	70050	FALSE
Cyst or abscess of Bartholin's gland	genitourinary	614.53	0.690301	48	66122	FALSE
Reiter's disease	musculoskeletal	711.2	0.690428	20	58128	FALSE
Symptoms affecting skin	dermatologic	687	0.690666	378	55334	FALSE
Postablative ovarian failure	endocrine/metabolic	258.1	0.691321	47	60887	FALSE
Acid-base balance disorder	endocrine/metabolic	276.4	0.692091	3575	50121	FALSE
Anxiety disorder	mental disorders	300.1	0.692126	8069	51749	FALSE
Respiratory failure, insufficiency, arrest	respiratory	509	0.692431	7169	56428	FALSE
Cyst and pseudocyst of pancreas	digestive	577.3	0.692965	384	68221	FALSE
Cystitis	genitourinary	592.1	0.693887	1101	53478	FALSE
Polymyositis	dermatologic	709.4	0.694206	81	59465	FALSE
Cancer of connective tissue	neoplasms	170.2	0.6943	601	69346	FALSE
Muscular wasting and disuse atrophy	symptoms	772.1	0.696753	97	61716	FALSE
Senile dementia	mental disorders	290.13	0.697416	206	56736	FALSE
Secondary malignancy of brain/spine	neoplasms	198.5	0.698266	1039	53779	FALSE
Cystic fibrosis	respiratory	499	0.698488	237	70341	FALSE
Bacteremia	infectious diseases	038.3	0.699207	2232	60935	FALSE
Testicular dysfunction	endocrine/metabolic	257	0.700322	904	61744	FALSE
Other diseases of respiratory system, not elsewhere classified	respiratory	519	0.700883	2274	65448	FALSE
Leukemia	neoplasms	204	0.701229	1112	68330	FALSE
Other symptoms involving urinary system	genitourinary	599.8	0.701483	189	52372	FALSE
Inflammation of eyelids	sense organs	371.3	0.701711	706	61829	FALSE
Symptomatic artificial menopause	genitourinary	627.21	0.702216	344	58963	FALSE
Poisoning/allergy of sulfonamides	injuries & poisonings	961.1	0.705959	669	55056	FALSE
Pectus and other congenital anomalies of ribs/sternum	congenital anomalies	756.2	0.706281	83	68048	FALSE
Other and unspecified complications of birth; puerperium affecting management of mother	pregnancy complications	654	0.706397	165	68963	FALSE
Congenital factor VIII disorder	hematopoietic	286.13	0.706833	80	55109	FALSE
Anal and rectal polyp	digestive	565.1	0.707193	125	58710	FALSE
Hyperpotassemia	endocrine/metabolic	276.13	0.707625	3208	49754	FALSE
Sepsis	injuries & poisonings	994.2	0.708358	4216	68182	FALSE
Noninfectious gastroenteritis	digestive	558	0.708955	2397	50696	FALSE
Cellulitis and abscess of trunk	dermatologic	681.7	0.70936	1102	59729	FALSE
Alzheimer's disease	mental disorders	290.11	0.709522	498	57028	FALSE
Type 2 diabetes with ophthalmic manifestations	endocrine/metabolic	250.23	0.709542	799	54995	FALSE
Multiple sclerosis	neurological	335	0.710324	1244	55599	FALSE
Nephritis and nephropathy with pathological lesion	genitourinary	580.32	0.711215	285	53434	FALSE
Acquired absence of breast	neoplasms	175	0.711465	956	61873	FALSE
Psychogenic disorder	mental disorders	303.3	0.711707	111	43791	FALSE
Dyspepsia and other specified disorders of function of stomach	digestive	536.8	0.711904	675	61366	FALSE
Cachexia	endocrine/metabolic	260.1	0.712575	215	50968	FALSE
Urticaria	dermatologic	947	0.71281	542	56820	FALSE
Hypercalcemia	endocrine/metabolic	275.6	0.713169	864	63554	FALSE
Methicillin sensitive Staphylococcus aureus	infectious diseases	041.11	0.714562	979	59682	FALSE
Abnormal results of function study of pulmonary system	respiratory	514.1	0.715598	83	64197	FALSE
Muscular dystrophies and other myopathies	neurological	359	0.715979	1163	64249	FALSE
Esophageal atresia/tracheoesophageal fistula	congenital anomalies	750.11	0.716133	28	66286	FALSE
Glycosuria or Acetonuria	endocrine/metabolic	250.5	0.716274	57	54253	FALSE
Hallucinations	mental disorders	292.6	0.71657	170	56700	FALSE
Appendicitis	digestive	540.1	0.716661	383	70027	FALSE
Inguinal hernia	digestive	550.1	0.717356	980	62614	FALSE
Right bundle branch block	circulatory system	426.31	0.718443	350	44801	FALSE
Anorexia	endocrine/metabolic	260.6	0.718472	985	51738	FALSE
Electrolyte imbalance	endocrine/metabolic	276.1	0.719891	10701	57247	FALSE
Osteopenia or other disorder of bone and cartilage	musculoskeletal	743.9	0.721309	3136	61610	FALSE
Decreased white blood cell count	hematopoietic	288.1	0.722525	2190	54851	FALSE
Toxic effect of other substances, chiefly nonmedicinal as to source	injuries & poisonings	989	0.722929	32	70041	FALSE
Tinnitus	sense organs	389.4	0.723188	896	62977	FALSE
Disorders resulting from impaired renal function	genitourinary	588	0.723448	1278	54427	FALSE
Perinatal disorders of digestive system	pregnancy complications	656.6	0.724683	131	68810	FALSE
Cardiac defibrillator in situ	circulatory system	426.92	0.726311	1258	45709	FALSE
Varicella infection	infectious diseases	079.1	0.72814	23	57440	FALSE
Lymphoid leukemia, acute	neoplasms	204.11	0.728186	178	67396	FALSE
Blood in stool	digestive	578.2	0.72859	2162	58114	FALSE
Type 1 diabetes with neurological manifestations	endocrine/metabolic	250.14	0.728807	505	54701	FALSE
Otitis externa	sense organs	380.1	0.729182	543	66242	FALSE
Other dyspnea	respiratory	512.9	0.729367	9963	47013	FALSE
Iron deficiency anemias, unspecified or not due to blood loss	hematopoietic	280.1	0.730599	2934	49350	FALSE
Substance addiction and disorders	mental disorders	316	0.734504	2392	56998	FALSE
Other cardiac conduction disorders	circulatory system	426.8	0.735055	167	44618	FALSE
Psoriasis and related disorders	dermatologic	696	0.73581	983	58672	FALSE
Other abnormal glucose	endocrine/metabolic	250.42	0.737285	1922	56118	FALSE
Adrenal cortical steroids causing adverse effects in therapeutic use	injuries & poisonings	962.1	0.737401	184	54571	FALSE
Paranoid disorders	mental disorders	295.2	0.739014	203	43883	FALSE
Other intestinal obstruction	digestive	560.4	0.739016	1484	49783	FALSE
Other sprains and strains	injuries & poisonings	842	0.739047	175	61946	FALSE
Fracture of hand or wrist	injuries & poisonings	804	0.739049	789	58845	FALSE
Inflammatory disease of breast	genitourinary	613.1	0.739455	231	66782	FALSE
Hypertrophy of breast (Gynecomastia)	genitourinary	612.2	0.742663	351	63622	FALSE
Respiratory complications	respiratory	519.2	0.744064	166	63340	FALSE
Chronic fatigue syndrome	symptoms	798.1	0.744208	819	43221	FALSE
Corneal edema	sense organs	364.2	0.744544	80	64184	FALSE
Poisoning by primarily systemic agents	injuries & poisonings	963	0.744613	1045	55432	FALSE
MRSA pneumonia	respiratory	480.13	0.745187	192	54331	FALSE
Open wounds of extremities	injuries & poisonings	871	0.745217	1359	63776	FALSE
Abnormal movement	neurological	350	0.745255	4768	66741	FALSE
Cerebral atherosclerosis	circulatory system	433.12	0.745313	298	59537	FALSE
Iron deficiency anemia secondary to blood loss (chronic)	hematopoietic	280.2	0.745365	993	47409	FALSE
Peripheral or central vertigo	sense organs	386.2	0.746181	715	60799	FALSE
Other specified diseases of hair and hair follicles	dermatologic	704.8	0.746255	361	65780	FALSE
Other and unspecified congenital anomalies	congenital anomalies	759	0.746963	647	68316	FALSE
Malignant neoplasm of gallbladder and extrahepatic bile ducts	neoplasms	159.3	0.747019	177	61957	FALSE
Disorders of optic nerve and visual pathways	sense organs	377	0.748153	542	61730	FALSE
Viral pneumonia	respiratory	480.2	0.749094	141	54280	FALSE
Polycythemia, secondary	hematopoietic	289.8	0.749229	294	52565	FALSE
Otorrhea	sense organs	381.9	0.74941	261	61642	FALSE
Other congenital musculoskeletal anomalies	congenital anomalies	756	0.749477	387	68352	FALSE
Chronic graft-versus-host disease	infectious diseases	081.12	0.749847	55	65551	FALSE
Contracture of tendon (sheath)	musculoskeletal	727.7	0.749988	202	54230	FALSE
Cataract	sense organs	366	0.750157	5290	68277	FALSE
Testicular hypofunction	endocrine/metabolic	257.1	0.750559	897	61737	FALSE
Mycoses	infectious diseases	117	0.752453	615	61466	FALSE
Endocrine and metabolic disturbances of fetus and newborn	pregnancy complications	656.3	0.75248	229	68908	FALSE
Congenital anomalies of the integument	congenital anomalies	757	0.75367	42	67711	FALSE
Ectropion or entropion	sense organs	374.1	0.754125	153	61276	FALSE
Suppurative and unspecified otitis media	sense organs	381.11	0.754557	1604	62985	FALSE
Epilepsy, recurrent seizures, convulsions	neurological	345	0.754689	3594	57949	FALSE
Hyperparathyroidism	endocrine/metabolic	252.1	0.755432	673	61513	FALSE
Adjustment reaction	mental disorders	304	0.755449	2254	45934	FALSE
Lack of normal physiological development, unspecified	endocrine/metabolic	264.9	0.755942	765	51518	FALSE
Hypertrophic obstructive cardiomyopathy	circulatory system	425.11	0.75663	212	64053	FALSE
Other immunological findings	endocrine/metabolic	279.7	0.756697	363	65414	FALSE
Malignant neoplasm of uterus	neoplasms	182	0.757026	466	63504	FALSE
Mood disorders	mental disorders	296	0.757178	10850	54530	FALSE
Antineoplastic and immunosuppressive drugs causing adverse effects	injuries & poisonings	963.1	0.758138	1024	55411	FALSE
Poisoning by water, mineral, and uric acid metabolism drugs	injuries & poisonings	974	0.758264	80	54467	FALSE
Delayed milestones	endocrine/metabolic	264.3	0.759666	660	51413	FALSE
Fracture of pelvis	injuries & poisonings	802	0.760386	453	58509	FALSE
Hemorrhage of gastrointestinal tract	digestive	578.9	0.760656	1636	57588	FALSE
Stress fracture	musculoskeletal	743.4	0.761263	124	58598	FALSE
Acidosis	endocrine/metabolic	276.41	0.761431	3255	49801	FALSE
Nodular lymphoma	neoplasms	202.21	0.765187	90	67308	FALSE
Rheumatoid arthritis and other inflammatory polyarthropathies	musculoskeletal	714	0.768046	2460	62154	FALSE
Primary open angle glaucoma	sense organs	365.11	0.768479	439	64543	FALSE
Nerve root lesions	neurological	353.2	0.768511	145	61367	FALSE
Cervical radiculitis	symptoms	765	0.770211	1019	63514	FALSE
Septal Deviations/Turbinate Hypertrophy	respiratory	470	0.770298	1878	51239	FALSE
Cysts of the jaws	digestive	526.1	0.770466	23	64719	FALSE
Ulcer of esophagus	digestive	530.12	0.770512	111	44430	FALSE
Balanoposthitis	genitourinary	601.4	0.770888	46	62990	FALSE
Parasomnia	neurological	327.5	0.770947	160	54161	FALSE
Elevated white blood cell count	hematopoietic	288.2	0.772969	3906	56567	FALSE
Other heart block	circulatory system	426.25	0.773397	43	44494	FALSE
Other symptoms involving abdomen and pelvis	digestive	579	0.773447	2749	58701	FALSE
Breast cancer	neoplasms	174	0.773918	2759	65293	FALSE
Diabetic retinopathy	endocrine/metabolic	250.7	0.774051	827	64435	FALSE
Other aneurysm	circulatory system	442	0.774505	1539	59638	FALSE
Other cerebral degenerations	neurological	331	0.775068	1027	55382	FALSE
Congenital deformities of feet	congenital anomalies	755.1	0.775714	156	68121	FALSE
Alopecia	dermatologic	704.1	0.776293	559	65978	FALSE
Empyema and pneumothorax	respiratory	506	0.776749	2277	51536	FALSE
Cerebral laceration and contusion	injuries & poisonings	816	0.777486	42	67715	FALSE
Pseudoexfoliation glaucoma	sense organs	365.5	0.778716	26	64130	FALSE
Benign neoplasm of respiratory and intrathoracic organs	neoplasms	212	0.779495	215	70109	FALSE
Systemic inflammatory response syndrome (SIRS)	injuries & poisonings	994.1	0.779532	944	64910	FALSE
Circulatory disease NEC	circulatory system	459.9	0.779734	644	58369	FALSE
Cervicocranial/Cervicobrachial syndrome	symptoms	767	0.780227	44	62539	FALSE
Inflammatory conditions of jaw	digestive	526.5	0.780623	110	64806	FALSE
Disorders of function of stomach	digestive	536	0.780788	1454	62145	FALSE
Graft-versus-host disease	infectious diseases	081.1	0.781536	66	65562	FALSE
Cancer of oropharynx	neoplasms	149.1	0.781632	485	68600	FALSE
Congenital anomalies of limbs	congenital anomalies	755	0.781889	417	68382	FALSE
Cellulitis and abscess of fingers/toes	dermatologic	681.1	0.782558	666	59293	FALSE
Sprains and strains	injuries & poisonings	840	0.782676	2459	64230	FALSE
Posttraumatic stress disorder	mental disorders	300.9	0.783424	1110	44790	FALSE
Generalized convulsive epilepsy	neurological	345.11	0.784093	727	55082	FALSE
Cervical cancer	neoplasms	180.1	0.784262	241	62144	FALSE
Colon cancer	neoplasms	153.2	0.784823	1473	59430	FALSE
Mechanical complication of unspecified genitourinary device, implant, and graft	injuries & poisonings	857	0.784874	100	60471	FALSE
Hypertensive heart and/or renal disease	circulatory system	401.2	0.785499	5605	42725	FALSE
Other specified congenital anomalies of nervous system	congenital anomalies	752.2	0.785994	362	68985	FALSE
Acute appendicitis	digestive	540.11	0.786342	355	69999	FALSE
Degeneration of intervertebral disc	musculoskeletal	722.6	0.786652	3356	59659	FALSE
Suicidal ideation or attempt	mental disorders	297	0.78678	911	44591	FALSE
Degeneration of macula and posterior pole of retina	sense organs	362.2	0.788908	1180	64788	FALSE
Other unspecified back disorders	musculoskeletal	724.9	0.789752	111	56414	FALSE
Chondrocalcinosis	endocrine/metabolic	274.21	0.789944	118	66897	FALSE
Acute pancreatitis	digestive	577.1	0.790373	637	68474	FALSE
Insomnia	neurological	327.4	0.791455	3645	57646	FALSE
Skull and face fracture and other intercranial injury	injuries & poisonings	819	0.791741	832	68505	FALSE
Stricture of artery	circulatory system	447.1	0.791744	138	58237	FALSE
Iron deficiency anemias	hematopoietic	280	0.792545	3450	49866	FALSE
Symptoms involving cardiovascular system	circulatory system	429.3	0.793287	769	58016	FALSE
Pelvic inflammatory disease, NOS	genitourinary	614.33	0.793391	59	66133	FALSE
Bundle branch block	circulatory system	426.3	0.794238	1029	45480	FALSE
Nystagmus and other irregular eye movements	sense organs	378.2	0.794619	106	61294	FALSE
Premenopausal menorrhagia	genitourinary	627.4	0.796876	68	58687	FALSE
Nonrheumatic tricuspid valve disorders	circulatory system	395.3	0.798131	536	58026	FALSE
Renal sclerosis, NOS	genitourinary	580.4	0.799632	165	53314	FALSE
Non-healing surgical wound	injuries & poisonings	875	0.800614	238	62655	FALSE
Crystal arthropathies	endocrine/metabolic	274.2	0.800711	123	66902	FALSE
Heart failure with reduced EF [Systolic or combined heart failure]	circulatory system	428.3	0.801627	3005	60252	FALSE
Exophthalmos	endocrine/metabolic	242.3	0.803027	105	56467	FALSE
Blood vessel replaced	circulatory system	459.7	0.803106	70	57795	FALSE
Congenital anomaly of fingers/toes	congenital anomalies	755.3	0.8047	45	68010	FALSE
Cancer of mouth	neoplasms	145	0.805135	796	68911	FALSE
Suicidal ideation	mental disorders	297.1	0.805644	784	44464	FALSE
Cervical cancer and dysplasia	neoplasms	180	0.808916	736	62639	FALSE
Disorders of the globe	sense organs	360	0.809312	178	64282	FALSE
Otitis media	sense organs	381.1	0.809607	1989	63370	FALSE
Postinflammatory pulmonary fibrosis	respiratory	502	0.810124	745	50004	FALSE
Psoriasis	dermatologic	696.4	0.810418	962	58651	FALSE
Heart valve disorders	circulatory system	395	0.810522	5412	62902	FALSE
Orchitis and epididymitis	genitourinary	601.3	0.810948	157	63101	FALSE
Autoimmune disease NEC	endocrine/metabolic	279.2	0.811195	48	65099	FALSE
Poisoning by hormones and synthetic substitutes	injuries & poisonings	962	0.812291	228	54615	FALSE
Phobia	mental disorders	300.13	0.812533	51	43731	FALSE
Hydrocele	genitourinary	603.1	0.812682	164	62058	FALSE
Cervical intraepithelial neoplasia [CIN] [Cervical dysplasia]	neoplasms	180.3	0.813594	508	62411	FALSE
Abnormal coagulation profile	hematopoietic	286.9	0.815339	180	55209	FALSE
Abnormal results of function study of kidney	genitourinary	589	0.815665	59	53208	FALSE
Respiratory failure	respiratory	509.1	0.81693	5050	54309	FALSE
Complications of labor and delivery NEC	pregnancy complications	669	0.817512	115	70111	FALSE
Breast cancer [female]	neoplasms	174.1	0.817795	2671	65205	FALSE
Trigeminal nerve disorders [CN5]	neurological	352.1	0.818221	414	61636	FALSE
Neutropenia	hematopoietic	288.11	0.818273	1753	54414	FALSE
Chronic vascular insufficiency of intestine	circulatory system	441.2	0.818634	76	58175	FALSE
Effects radiation NOS	injuries & poisonings	990	0.819646	1184	63009	FALSE
Macular degeneration, dry	sense organs	362.21	0.819776	258	63866	FALSE
Hidradenitis	dermatologic	705.3	0.819792	114	63490	FALSE
Bacterial pneumonia	respiratory	480.1	0.820032	1583	55722	FALSE
Other open wound of head and face	injuries & poisonings	870.3	0.820461	348	62765	FALSE
Benign neoplasm of thyroid glands	neoplasms	226	0.82135	164	68306	FALSE
Pain and other symptoms associated with female genital organs	genitourinary	625	0.822947	1143	66469	FALSE
ASCVD	circulatory system	414.2	0.82339	347	52770	FALSE
Joint effusions	musculoskeletal	741.4	0.824636	1120	60132	FALSE
Sacroiliitis NEC	musculoskeletal	715.1	0.824726	575	60269	FALSE
Aplastic anemia	hematopoietic	284	0.825792	1402	47818	FALSE
Cardiac pacemaker/device in situ	circulatory system	426.9	0.825817	2641	47092	FALSE
Iatrogenic pulmonary embolism and infarction	circulatory system	452.1	0.826315	62	54104	FALSE
Hydrocephalus	neurological	331.1	0.826725	758	55113	FALSE
Retinal detachment with retinal defect	sense organs	361.1	0.827126	217	64321	FALSE
Psychophysical visual disturbances	sense organs	368.91	0.828964	82	65050	FALSE
Incisional hernia	digestive	550.6	0.829521	1019	62653	FALSE
Traumatic and surgical subcutaneous emphysema	injuries & poisonings	958.2	0.830211	227	68965	FALSE
Bladder neck obstruction	genitourinary	596.1	0.830248	201	63592	FALSE
Diabetes insipidus	endocrine/metabolic	253.3	0.830537	88	60928	FALSE
Genu valgum or varum (acquired)	musculoskeletal	736.4	0.831124	46	61422	FALSE
Congenital coagulation defects	hematopoietic	286.1	0.83128	247	55276	FALSE
Arthralgia/ankylosis of temporomandibular joint	digestive	526.42	0.831582	47	64743	FALSE
Apnea	respiratory	513.31	0.832435	188	65123	FALSE
Transitory tachypnea or apnea of newborn	pregnancy complications	656.26	0.832778	215	68894	FALSE
Polyneuropathy in diabetes	endocrine/metabolic	250.6	0.832959	1767	55963	FALSE
Toxic maculopathy of retina	sense organs	362.5	0.833705	93	63701	FALSE
Disorders of the pituitary gland and its hypothalamic control	endocrine/metabolic	253	0.833827	798	61638	FALSE
Bursitis	musculoskeletal	726.3	0.834126	714	54742	FALSE
Staphylococcus infections	infectious diseases	041.1	0.834275	2228	60931	FALSE
Acquired spondylolisthesis	musculoskeletal	738.4	0.834976	889	62265	FALSE
Renal failure NOS	genitourinary	585.2	0.834986	936	54085	FALSE
Cancer within the respiratory system	neoplasms	165	0.835796	2465	69350	FALSE
Contact dermatitis and other eczema due to plants [except food]	dermatologic	931	0.83584	120	56398	FALSE
Peripheral enthesopathies and allied syndromes	musculoskeletal	726	0.836548	5397	59425	FALSE
Disorders of parathyroid gland	endocrine/metabolic	252	0.837017	769	61609	FALSE
Complication of nervous system device, implant, and graft	injuries & poisonings	855	0.838013	439	60810	FALSE
Aortic ectasia	circulatory system	447.7	0.838101	371	58470	FALSE
Infectious and parasitic complications affecting pregnancy	pregnancy complications	647	0.839101	93	69572	FALSE
Abnormal function study of cardiovascular system	circulatory system	429.2	0.839279	73	57320	FALSE
Depression	mental disorders	296.2	0.839449	9416	53096	FALSE
Decubitus ulcer	dermatologic	707.1	0.841022	791	67567	FALSE
Open wound of neck	injuries & poisonings	870.6	0.845319	29	62446	FALSE
Embolism and thrombosis of abdominal aorta	circulatory system	444.2	0.84638	66	58165	FALSE
Aortic aneurysm	circulatory system	442.1	0.846523	1208	59307	FALSE
Intracranial hemorrhage	circulatory system	430	0.846622	1070	60309	FALSE
Other and unspecified disorders of back	musculoskeletal	724	0.84875	881	57184	FALSE
Ventral hernia	digestive	550.5	0.84914	697	62331	FALSE
Pneumonitis due to inhalation of food or vomitus	respiratory	501	0.849595	856	50115	FALSE
Spinal stenosis of lumbar region	musculoskeletal	720.1	0.851527	2000	58303	FALSE
Nonspecific abnormal findings in stool contents	digestive	579.8	0.853101	151	56103	FALSE
Tobacco use disorder	mental disorders	318	0.853158	6901	61507	FALSE
Gram positive septicemia	infectious diseases	038.2	0.853395	618	59321	FALSE
Intracerebral hemorrhage	circulatory system	430.2	0.854121	555	59794	FALSE
Diseases of white blood cells	hematopoietic	288	0.854575	4626	57287	FALSE
Mitral valve disease	circulatory system	394.2	0.854818	306	57796	FALSE
Interstitial emphysema and related conditions of newborn	pregnancy complications	656.22	0.855062	67	68746	FALSE
Thoracic or lumbosacral neuritis or radiculitis, unspecified	symptoms	763	0.856003	2110	64605	FALSE
Other specified diffuse diseases of connective tissue	dermatologic	709.6	0.85606	266	59650	FALSE
Varicose veins	circulatory system	454	0.856187	695	54737	FALSE
Other arthropathies	musculoskeletal	716	0.856275	1819	59927	FALSE
Paralytic ileus	digestive	560.1	0.857025	1044	49343	FALSE
Somatoform disorder	mental disorders	303.4	0.857029	300	43980	FALSE
Acute laryngitis and tracheitis	respiratory	465.4	0.857305	244	52448	FALSE
Iatrogenic endocrine disorders	endocrine/metabolic	258	0.857377	48	60888	FALSE
Nontoxic multinodular goiter	endocrine/metabolic	241.2	0.858247	1334	57696	FALSE
Spondylosis without myelopathy	musculoskeletal	721.1	0.858773	3159	59462	FALSE
Disorders of sacrum	musculoskeletal	724.1	0.859072	233	56536	FALSE
Symptoms involving nervous and musculoskeletal systems	symptoms	781	0.859185	650	68109	FALSE
Unspecified polyarthropathy or polyarthritis	musculoskeletal	716.1	0.859918	41	58149	FALSE
Other specified gastritis	digestive	535.8	0.859918	422	61113	FALSE
Traumatic arthropathy	injuries & poisonings	836	0.861527	162	65564	FALSE
Sciatica	symptoms	764	0.86159	1306	63801	FALSE
Blastomycotic infection	infectious diseases	117.3	0.862263	23	60874	FALSE
Aneurysm and dissection of heart	circulatory system	411.41	0.862719	92	52515	FALSE
Renal dialysis	genitourinary	585.31	0.86274	878	54027	FALSE
Hypotony of eye	sense organs	360.3	0.863907	20	64124	FALSE
Malignant neoplasm of female breast	neoplasms	174.11	0.863998	2647	65181	FALSE
Aspergillosis	infectious diseases	117.4	0.865409	115	60966	FALSE
Encephalitis, non-infectious	neurological	323.8	0.866107	125	69193	FALSE
Subarachnoid hemorrhage	circulatory system	430.1	0.867501	334	59573	FALSE
Delirium dementia and amnestic and other cognitive disorders	mental disorders	290	0.867531	1839	58369	FALSE
Other specified disorders involving the immune mechanism	endocrine/metabolic	279.8	0.868397	57	65108	FALSE
Erythematous conditions	dermatologic	695	0.868535	2416	62684	FALSE
Bone cancer	neoplasms	170.1	0.868839	421	69166	FALSE
Abnormal granulation tissue	dermatologic	701.5	0.869729	126	63197	FALSE
Tympanosclerosis and middle ear disease related to otitis media	sense organs	385.5	0.870609	58	61439	FALSE
Cancer of bone and connective tissue	neoplasms	170	0.871148	874	69619	FALSE
Disorders of external ear	sense organs	380	0.872505	109	65808	FALSE
Schizophrenia	mental disorders	295.1	0.873209	255	43935	FALSE
Torticollis	musculoskeletal	723.1	0.87421	64	56367	FALSE
Proliferative glomerulonephritis	genitourinary	580.11	0.874618	96	53245	FALSE
Senile cataract	sense organs	366.2	0.875534	4532	67519	FALSE
Convulsions	neurological	345.3	0.875717	3062	57417	FALSE
Other disorders of lipoid metabolism	endocrine/metabolic	277.5	0.876308	178	67152	FALSE
Cancer of hypopharynx	neoplasms	149.3	0.876796	74	68189	FALSE
Pelvic inflammatory disease (PID)	genitourinary	614.3	0.876801	180	66254	FALSE
Thyroiditis	endocrine/metabolic	245	0.876886	936	57298	FALSE
Encounter for long-term (current) use of antibiotics	infectious diseases	980	0.877002	1957	68245	FALSE
Toxic erythema	dermatologic	695.1	0.877576	28	60296	FALSE
Sebaceous cyst	dermatologic	706.2	0.877591	1237	64613	FALSE
Cancer of bronchus; lung	neoplasms	165.1	0.877713	2444	69329	FALSE
Gastric ulcer	digestive	531.2	0.87848	307	67086	FALSE
Breast cancer [male]	neoplasms	174.2	0.88033	293	62827	FALSE
Articular cartilage disorder	musculoskeletal	742.8	0.880354	26	59038	FALSE
Amyotrophic Lateral Sclerosis	neurological	334.21	0.882933	81	54436	FALSE
Sicca syndrome	dermatologic	709.2	0.882933	402	59786	FALSE
Gross hematuria	genitourinary	593.1	0.883568	699	53076	FALSE
Altered mental status	mental disorders	292.4	0.883764	3972	60502	FALSE
Complications of cardiac/vascular device, implant, and graft	injuries & poisonings	854	0.884829	1017	61388	FALSE
Ankylosing spondylitis	musculoskeletal	715.2	0.885272	146	59840	FALSE
Certain early complications of trauma or procedure	injuries & poisonings	958	0.886065	665	69403	FALSE
Breast conditions, congenital or relating to hormones	genitourinary	612	0.886631	415	63686	FALSE
Poisoning by other anti-infectives	injuries & poisonings	961	0.886822	105	54492	FALSE
Nonrheumatic mitral valve disorders	circulatory system	395.1	0.887646	3165	60655	FALSE
Vitamin B-complex deficiencies	endocrine/metabolic	261.2	0.887898	1574	52327	FALSE
Juvenile rheumatoid arthritis	musculoskeletal	714.2	0.888332	290	59984	FALSE
Chemotherapy	neoplasms	197	0.888344	7466	60206	FALSE
Pituitary dwarfism	endocrine/metabolic	253.5	0.888584	200	61040	FALSE
Polycythemia vera	neoplasms	200.1	0.888861	214	59474	FALSE
Hypertensive heart disease	circulatory system	401.21	0.889915	2978	40098	FALSE
Rash and other nonspecific skin eruption	dermatologic	687.1	0.890079	4052	59008	FALSE
Other CNS infection and poliomyelitis	neurological	324	0.890339	252	69320	FALSE
Pectus excavatum	congenital anomalies	756.21	0.890762	56	68021	FALSE
Myringitis	sense organs	384.1	0.891453	24	61405	FALSE
Aseptic necrosis of bone	musculoskeletal	733.4	0.891991	357	58076	FALSE
Heart valve replaced	circulatory system	395.6	0.892625	1216	58706	FALSE
Chronic kidney disease, Stage I or II	genitourinary	585.4	0.892818	1177	54326	FALSE
Corneal opacity	sense organs	364.1	0.893662	188	64292	FALSE
Early onset of delivery	pregnancy complications	636.2	0.893666	433	67841	FALSE
Postphlebitic syndrome	circulatory system	452.8	0.893851	37	54079	FALSE
Psychogenic and somatoform disorders	mental disorders	303	0.895567	418	44098	FALSE
Atrioventricular [AV] block	circulatory system	426.2	0.895601	1192	45643	FALSE
Allergic purpura	hematopoietic	287.2	0.896114	51	55080	FALSE
Varicose veins of lower extremity, symptomtic	circulatory system	454.11	0.898231	355	54397	FALSE
Hemarthrosis	musculoskeletal	741.5	0.898908	37	59049	FALSE
Galactorrhea	genitourinary	612.1	0.899893	52	63323	FALSE
Cancer of other female genital organs (excluding uterus and ovary)	neoplasms	184.2	0.900624	202	63909	FALSE
Lack of normal physiological development	endocrine/metabolic	264	0.901447	1942	52695	FALSE
Pathologic fracture	musculoskeletal	743.2	0.901764	819	59293	FALSE
Other disorders of arteries and arterioles	circulatory system	447	0.901901	776	58875	FALSE
Decreased libido	mental disorders	302.1	0.902441	159	43839	FALSE
Abnormal serum enzyme levels	digestive	573.9	0.902689	513	57143	FALSE
Abnormality of gait	neurological	350.2	0.903334	2784	64757	FALSE
Cancer of the gums	neoplasms	145.4	0.903746	86	68201	FALSE
Hypothermia/Chills	symptoms	780	0.903997	181	69922	FALSE
Corns and callosities	dermatologic	700	0.904	367	63438	FALSE
Complication of amputation stump	injuries & poisonings	874	0.904243	144	62561	FALSE
Benign neoplasm of adrenal gland	neoplasms	227.1	0.905234	182	68324	FALSE
Graves' disease	endocrine/metabolic	242.1	0.906084	474	56836	FALSE
Subdural hemorrhage	circulatory system	430.3	0.906752	331	59570	FALSE
Adverse reaction to serum or vaccine	injuries & poisonings	941	0.90677	58	56336	FALSE
Chronic periodontitis	digestive	523.32	0.907186	42	64738	FALSE
Dysplasia of female genital organs	genitourinary	620	0.907357	82	69138	FALSE
Alkalosis	endocrine/metabolic	276.42	0.907719	485	47031	FALSE
Insect bite	injuries & poisonings	912	0.908647	185	68412	FALSE
Phenylketonuria [PKU]	endocrine/metabolic	270.12	0.909086	38	66279	FALSE
Musculoskeletal symptoms referable to limbs	symptoms	771	0.909234	737	62735	FALSE
Keloid scar	dermatologic	701.4	0.909484	206	63277	FALSE
Paralytic strabismus	sense organs	378.5	0.909802	147	61335	FALSE
Displacement of intervertebral disc	musculoskeletal	722.1	0.910016	1142	57445	FALSE
Optic atrophy	sense organs	377.1	0.910373	153	61341	FALSE
Colles' fracture	injuries & poisonings	803.21	0.910584	171	58227	FALSE
Other disorders of peritoneum	digestive	568	0.910843	1057	59642	FALSE
Diabetes type 1 with peripheral circulatory disorders	endocrine/metabolic	250.15	0.911103	66	54262	FALSE
Femoral hernia	digestive	550.3	0.912505	21	61655	FALSE
Duodenitis	digestive	535.6	0.913645	210	60901	FALSE
Claw toe (acquired)	musculoskeletal	735.22	0.914307	28	61404	FALSE
Cervical incompetence	pregnancy complications	636.8	0.914407	87	67495	FALSE
Fuchs' dystrophy	sense organs	364.51	0.915545	102	64206	FALSE
Edema	symptoms	782.3	0.915598	5828	63994	FALSE
Pleurisy; pleural effusion	respiratory	507	0.915643	6843	56102	FALSE
Erectile dysfunction [ED]	genitourinary	605	0.916305	1750	63644	FALSE
Otosclerosis	sense organs	383	0.916528	31	61412	FALSE
Complications of gastrostomy, colostomy and enterostomy	digestive	536.7	0.916742	463	61154	FALSE
Benign neoplasm of unspecified sites	neoplasms	229	0.917648	103	69773	FALSE
Other disorders of thyroid	endocrine/metabolic	246	0.917841	475	56837	FALSE
Peyronie's disease	genitourinary	604.3	0.918478	108	62002	FALSE
Alopecia Areata	dermatologic	704.11	0.918495	84	65503	FALSE
Kyphosis (acquired)	musculoskeletal	737.1	0.91871	225	61601	FALSE
Solitary pulmonary nodule	respiratory	514.2	0.918933	1325	65439	FALSE
Muscle weakness	symptoms	772.3	0.919308	2813	64432	FALSE
Helminthiases	infectious diseases	134	0.919675	27	67960	FALSE
Drusen (degenerative) of retina	sense organs	362.27	0.919776	193	63801	FALSE
Retention of urine	genitourinary	599.2	0.921046	2082	54265	FALSE
Myopathy	neurological	359.2	0.921513	1101	64187	FALSE
Peptic ulcer (excl. esophageal)	digestive	531	0.921528	954	67733	FALSE
Diffuse diseases of connective tissue	dermatologic	709	0.922302	1202	60586	FALSE
Cervicalgia	symptoms	761	0.922664	4687	66309	FALSE
Cancer of tongue	neoplasms	145.2	0.923093	435	68550	FALSE
Circadian rhythm sleep disorder	neurological	327.6	0.924062	38	54039	FALSE
Spinal stenosis	musculoskeletal	720	0.924266	2669	58972	FALSE
Poisoning by antibiotics	injuries & poisonings	960	0.924316	1574	55961	FALSE
Arthropathy NOS	musculoskeletal	716.9	0.924505	1699	59807	FALSE
Abnormal posture	symptoms	781.2	0.926732	466	67925	FALSE
Disorders of sweat glands	dermatologic	705	0.927539	256	63632	FALSE
Spermatocele	genitourinary	603.2	0.928871	59	61953	FALSE
Peritoneal adhesions (postoperative) (postinfection)	digestive	568.1	0.92945	782	59367	FALSE
Lipoprotein disorders	endocrine/metabolic	277.51	0.929604	106	67080	FALSE
Secondary malignancy of lymph nodes	neoplasms	198.1	0.930691	3381	56121	FALSE
Peptic ulcer, site unspecified	digestive	531.4	0.931272	278	67057	FALSE
Varicose veins of lower extremity	circulatory system	454.1	0.931358	461	54503	FALSE
Chronic lymphocytic thyroiditis	endocrine/metabolic	245.21	0.931866	682	57044	FALSE
Chronic thyroiditis	endocrine/metabolic	245.2	0.932455	687	57049	FALSE
Other acquired musculoskeletal deformity	musculoskeletal	738	0.932872	1202	62578	FALSE
Other inflammatory spondylopathies	musculoskeletal	715	0.933807	801	60495	FALSE
Fluid overload	endocrine/metabolic	276.6	0.934836	2656	49202	FALSE
Open wound of foot except toe(s) alone	injuries & poisonings	871.3	0.935599	154	62571	FALSE
Oliguria and anuria	genitourinary	599.6	0.936347	209	52392	FALSE
Other specified erythematous conditions	dermatologic	695.8	0.937649	271	60539	FALSE
Behcet's syndrome	musculoskeletal	711.3	0.937818	49	58157	FALSE
Temporomandibular joint disorders	digestive	526.4	0.938697	240	64936	FALSE
Toxic gastroenteritis and colitis	digestive	569.1	0.939315	54	58639	FALSE
Malaise and fatigue	symptoms	798	0.939673	16988	59390	FALSE
Localized adiposity	endocrine/metabolic	278.3	0.940149	220	54327	FALSE
Nontoxic nodular goiter	endocrine/metabolic	241	0.940219	1909	58271	FALSE
Abnormal spermatozoa	genitourinary	609.2	0.940367	31	61925	FALSE
Tracheostomy complications	respiratory	519.1	0.940404	136	63310	FALSE
Polyneuropathy due to drugs	mental disorders	316.1	0.941521	367	54973	FALSE
Monocytic leukemia	neoplasms	204.3	0.942697	58	67276	FALSE
Dermatophytosis of nail	infectious diseases	110.11	0.944791	1529	62380	FALSE
Vitamin A deficiency	endocrine/metabolic	261.1	0.945205	46	50799	FALSE
Retinopathy of prematurity	sense organs	362.1	0.94542	99	63707	FALSE
Polymyalgia Rheumatica	musculoskeletal	717	0.945476	383	70098	FALSE
Moyamoya disease	circulatory system	433.32	0.945839	22	59261	FALSE
Acute reaction to stress	mental disorders	300.8	0.945974	159	43839	FALSE
Male infertility and abnormal spermatozoa	genitourinary	609	0.946662	52	61946	FALSE
Sexual and gender identity disorders	mental disorders	302	0.95043	250	43930	FALSE
Cellulitis and abscess of oral soft tissues	digestive	528.3	0.951273	118	65898	FALSE
Manlignant and unknown neoplasms of brain and nervous system	neoplasms	191	0.951431	838	68694	FALSE
Unspecified osteomyelitis	musculoskeletal	710.19	0.952543	768	58876	FALSE
Infection of the eye	sense organs	369	0.953347	1107	62230	FALSE
Other signs and symptoms in breast	genitourinary	613.7	0.95388	303	66854	FALSE
Ankylosis of joint	musculoskeletal	741.1	0.9545	65	59077	FALSE
Macroglobulinemia	endocrine/metabolic	270.35	0.954598	22	66263	FALSE
Changes in skin texture	dermatologic	687.3	0.955196	48	55004	FALSE
Hypothyroidism	endocrine/metabolic	244	0.955523	8125	64487	FALSE
Symptoms involving head and neck	mental disorders	293	0.955746	194	65757	FALSE
Impulse control disorder	mental disorders	312.3	0.956346	109	65316	FALSE
Pituitary hypofunction	endocrine/metabolic	253.2	0.956756	254	61094	FALSE
Hemolytic-uremic syndrome	hematopoietic	283.21	0.95701	40	46456	FALSE
Anomalies of pupillary function	sense organs	379.4	0.957267	79	61267	FALSE
Cancer of brain	neoplasms	191.11	0.957538	592	68448	FALSE
Preeclampsia and eclampsia	pregnancy complications	642.1	0.958641	317	69763	FALSE
Disorders of the autonomic nervous system	neurological	337	0.958744	397	54752	FALSE
Disorders of coccyx	musculoskeletal	724.2	0.959828	220	56523	FALSE
Corneal dystrophy	sense organs	364.5	0.95987	156	64260	FALSE
Hypothyroidism NOS	endocrine/metabolic	244.4	0.960189	7517	63879	FALSE
Hyperglyceridemia	endocrine/metabolic	272.12	0.960362	518	46002	FALSE
Unspecified disorder of lipoid metabolism	endocrine/metabolic	272.9	0.961079	33	45517	FALSE
Develomental delays and disorders	mental disorders	315	0.961292	1442	66649	FALSE
Swelling of limb	symptoms	771.1	0.961397	2995	64993	FALSE
Disorders of iris and ciliary body	sense organs	379.5	0.961483	165	61353	FALSE
Myoneural disorders	neurological	358	0.961882	250	63336	FALSE
Abdominal hernia	digestive	550	0.961957	4318	65952	FALSE
Tension headache	mental disorders	306.9	0.962259	125	43805	FALSE
Psoriasis vulgaris	dermatologic	696.41	0.962425	765	58454	FALSE
Non-autoimmune hemolytic anemias	hematopoietic	283.2	0.962955	78	46494	FALSE
Chronic osteomyelitis	musculoskeletal	710.12	0.963572	550	58658	FALSE
Systemic sclerosis	dermatologic	709.3	0.963723	281	59665	FALSE
Major puerperal infection	pregnancy complications	647.3	0.963905	42	69521	FALSE
Benign neoplasm of kidney and other urinary organs	neoplasms	223	0.964033	62	54983	FALSE
Nerve plexus lesions	neurological	353.1	0.964438	116	61338	FALSE
Cystoid macular degeneration of retina	sense organs	362.23	0.964518	298	63906	FALSE
Mobitz II AV block	circulatory system	426.22	0.964759	50	44501	FALSE
Late effects of cerebrovascular disease	circulatory system	433.8	0.964953	1034	60273	FALSE
Anemia in chronic kidney disease	hematopoietic	285.21	0.965791	1170	47586	FALSE
Threatened premature labor	pregnancy complications	636.1	0.966176	464	67872	FALSE
Periapical abscess	digestive	522.5	0.966457	156	64852	FALSE
End stage renal disease	genitourinary	585.32	0.966492	1455	54604	FALSE
Anemia in neoplastic disease	hematopoietic	285.22	0.966496	2039	48455	FALSE
Impaction of intestine	digestive	560.2	0.966625	151	48450	FALSE
Other nondiabetic retinopathy	sense organs	362.3	0.967082	329	63937	FALSE
Diseases of thymus gland	endocrine/metabolic	254	0.968459	21	60861	FALSE
Heart transplant/surgery	circulatory system	429.1	0.969048	760	58007	FALSE
Cancer of brain and nervous system	neoplasms	191.1	0.970078	657	68513	FALSE
Symptoms involving skin and other integumentary tissue	symptoms	782	0.970501	273	58439	FALSE
Atherosclerosis of native arteries of the extremities with ulceration or gangrene	circulatory system	440.21	0.971039	255	58354	FALSE
Malignant neoplasm of rectum, rectosigmoid junction, and anus	neoplasms	153.3	0.97155	1036	58993	FALSE
Contracture of joint	musculoskeletal	739	0.971695	428	61804	FALSE
Cerebral artery occlusion, with cerebral infarction	circulatory system	433.21	0.97484	1799	61038	FALSE
First degree AV block	circulatory system	426.21	0.975058	235	44686	FALSE
Colorectal cancer	neoplasms	153	0.975264	1957	59914	FALSE
Traumatic amputation	injuries & poisonings	872	0.975318	137	62554	FALSE
Osteomyelitis	musculoskeletal	710.1	0.975337	1059	59167	FALSE
Erythema nodosum	dermatologic	695.81	0.975472	48	60316	FALSE
Osteoarthrosis involving more than one site, but not specified as generalized	musculoskeletal	740.3	0.975817	144	55130	FALSE
Scar conditions and fibrosis of skin	dermatologic	701.2	0.975934	1127	64198	FALSE
Mild cognitive impairment	mental disorders	292.2	0.975961	460	56990	FALSE
Thyrotoxic exophthalmos	endocrine/metabolic	242.31	0.976809	27	56389	FALSE
Muscle/tendon sprain	injuries & poisonings	840.1	0.977636	77	61848	FALSE
Other hypertrophic cardiomyopathy	circulatory system	425.12	0.978206	137	63978	FALSE
Other diseases of respiratory system, NEC	respiratory	519.8	0.97855	369	63543	FALSE
Osteomyelitis, periostitis, and other infections involving bone	musculoskeletal	710	0.97879	1268	59376	FALSE
Short stature	endocrine/metabolic	264.1	0.979586	596	51349	FALSE
Diplopia and disorders of binocular vision	sense organs	368.2	0.9797	561	65529	FALSE
Bronchopneumonia and lung abscess	respiratory	480.5	0.979962	286	54425	FALSE
Occlusion of cerebral arteries	circulatory system	433.2	0.979974	1859	61098	FALSE
Facial weakness	symptoms	772.6	0.98087	203	61822	FALSE
Other cardiomyopathy	circulatory system	425.8	0.981045	106	63947	FALSE
Corneal opacity and other disorders of cornea	sense organs	364	0.981186	364	64468	FALSE
Pneumonia	respiratory	480	0.981979	6690	60829	FALSE
Myeloid leukemia	neoplasms	204.2	0.984265	758	67976	FALSE
Congenital anomalies of genital organs	congenital anomalies	751.1	0.985432	374	66632	FALSE
Endometriosis	genitourinary	615	0.985904	329	66403	FALSE
Temporomandibular joint disorder, unspecified	digestive	526.41	0.986701	158	64854	FALSE
Pernicious anemia	hematopoietic	281.11	0.987092	270	46686	FALSE
Raynaud's syndrome	circulatory system	443.1	0.987558	470	58569	FALSE
Chronic sinusitis	respiratory	475	0.987828	2825	52186	FALSE
Cholesterolosis of gallbladder	digestive	575.6	0.988439	25	64105	FALSE
Lagophthalmos	sense organs	374.2	0.988507	66	61189	FALSE
Anorexia nervosa	mental disorders	305.21	0.988709	126	43806	FALSE
Disorders of other cranial nerves	neurological	352	0.989126	667	61889	FALSE
Diseases of pulp and periapical tissues	digestive	522	0.990072	164	64860	FALSE
Viremia, NOS	infectious diseases	079.9	0.990118	213	57630	FALSE
Second degree AV block	circulatory system	426.23	0.990932	262	44713	FALSE
Thyrotoxicosis with or without goiter	endocrine/metabolic	242	0.991021	900	57262	FALSE
Loose body in joint	musculoskeletal	742.1	0.991623	42	59054	FALSE
Eating disorder	mental disorders	305.2	0.993286	436	44116	FALSE
Cerebrovascular disease	circulatory system	433	0.993744	5246	64485	FALSE
Benign neoplasm of lip, oral cavity, and pharynx	neoplasms	210	0.994063	208	68323	FALSE
Bronchiectasis	respiratory	496.3	0.994755	485	55843	FALSE
Anemia of chronic disease	hematopoietic	285.2	0.995387	3631	50047	FALSE
Nerve root and plexus disorders	neurological	353	0.996261	325	61547	FALSE
Eosinophilic esophagitis	digestive	530.15	0.996354	162	44481	FALSE
Myeloid leukemia, acute	neoplasms	204.21	0.996589	642	67860	FALSE
Symbolic dysfunction	mental disorders	292.12	0.996786	71	56601	FALSE
Congenital anomalies of male genital organs	congenital anomalies	751.12	0.996983	272	66530	FALSE
Polydipsia	endocrine/metabolic	276.8	0.997686	36	46582	FALSE
Pseudomonal pneumonia	respiratory	480.12	0.997746	300	54439	FALSE
Umbilical hernia	digestive	550.4	0.998107	587	62221	FALSE
Ventricular fibrillation and flutter	circulatory system	427.41	0.999454	258	44709	FALSE
Cerebral ischemia	circulatory system	433.3	0.99975	2394	61633	FALSE
Transient cerebral ischemia	circulatory system	433.31	0.999898	2257	61496	FALSE
Cornea replaced by transplant	sense organs	364.9	0.999959	51	64155	FALSE
Acute dermatitis due to solar radiation	dermatologic	938.1	0.99997	29	56307	FALSE
