# Supplementary material for: Nutrient State, Aging, and Diet Modulate SAM50-Dependent Mitochondrial Remodeling and Systemic Metabolic Signatures
Source: Research Square preprint supplement (doi:10.21203/rs.3.rs-8704245/v1), 2026-02-16
Supplement: Supplementary file 3 [file 8bad1945a3709500d47c12fd.docx]

| **Supplemental Table 1. Demographics for BioVU Cohorts** | | |
| --- | --- | --- |
| **Metric** | **European genetic ancestry** | **African genetic ancestry** |
| **N** | 70,404 | 15,175 |
| **Sex (% Male)** | 44.10 | 38.40 |
| **Current Age (Mean**+ **SD)** | 57.04 + 22.42 | 46.48 + 21.39 |
| **Median Age of Record (Mean**+**SD)** | 48.43 + 22.24 | 38.32 + 21.41 |
