# Supplementary material for: Nutrient State, Aging, and Diet Modulate SAM50-Dependent Mitochondrial Remodeling and Systemic Metabolic Signatures
Source: Research Square preprint supplement (doi:10.21203/rs.3.rs-8704245/v1), 2026-02-16
Supplement: Supplementary file 4 [file c19da0a7fe97a24ccd633b0b.xlsx]

## Sheet: PheWAS_AfricanAncestry
Supplemental File 3: PheWAS results for SAMM50 GREX in BioVU individuals of African ancestry
Phenotype Description	Phenotype Group	Phenotype Code (Phecode)	p-value	n_cases	n_samples	Bonferroni Significant
Endocarditis	circulatory system	420.3	0.000280955	66	14071	FALSE
Supraventricular premature beats	circulatory system	427.61	0.000371945	26	10861	FALSE
Delirium due to conditions classified elsewhere	mental disorders	290.2	0.000907075	99	12887	FALSE
Blindness and low vision	sense organs	367.9	0.000945641	101	14062	FALSE
Acute gastritis	digestive	535.1	0.00141834	30	13496	FALSE
Tinnitus	sense organs	389.4	0.00158527	84	14264	FALSE
Other disorders of male genital organs	genitourinary	608	0.00264769	99	13866	FALSE
Duodenal ulcer	digestive	531.3	0.00269486	26	14592	FALSE
Incisional hernia	digestive	550.6	0.00432831	99	13856	FALSE
Premature beats	circulatory system	427.6	0.0058302	114	10949	FALSE
Pathologic fracture of femur	musculoskeletal	743.22	0.00590264	25	13800	FALSE
Infertility, female	genitourinary	626.8	0.00648859	43	12215	FALSE
Thyroid cancer	neoplasms	193	0.00666642	53	14847	FALSE
Urethral hypermobility/ISD	genitourinary	597.8	0.00680534	28	14003	FALSE
Other specified diseases of sebaceous glands	dermatologic	706.8	0.0075314	30	13907	FALSE
Dentofacial anomalies, including malocclusion	digestive	524	0.00764815	80	13704	FALSE
Genu valgum or varum (acquired)	musculoskeletal	736.4	0.00878171	20	13561	FALSE
Senile dementia	mental disorders	290.13	0.00883218	34	12822	FALSE
Duodenitis	digestive	535.6	0.00980748	31	13497	FALSE
Uterine/Uterovaginal prolapse	genitourinary	618.2	0.0104898	31	15036	FALSE
Encephalitis	neurological	323	0.0105678	45	14928	FALSE
Anomalies of tooth position/malocclusion	digestive	524.3	0.0108755	76	13700	FALSE
Mycoses	infectious diseases	117	0.0116705	111	12561	FALSE
Histoplasmosis	infectious diseases	117.1	0.0118364	41	12491	FALSE
Hemorrhoids	circulatory system	455	0.01195	210	12768	FALSE
Systemic inflammatory response syndrome (SIRS)	injuries & poisonings	994.1	0.011968	149	14324	FALSE
Testicular hypofunction	endocrine/metabolic	257.1	0.0126418	87	13394	FALSE
Primary pulmonary hypertension	circulatory system	415.21	0.0126734	97	12897	FALSE
Corneal opacity and other disorders of cornea	sense organs	364	0.0144636	71	13832	FALSE
Testicular dysfunction	endocrine/metabolic	257	0.0147255	90	13397	FALSE
Diseases of the salivary glands	digestive	527	0.0160135	108	14520	FALSE
Occlusion of cerebral arteries	circulatory system	433.2	0.0163521	385	13823	FALSE
Corneal opacity	sense organs	364.1	0.0164008	23	13784	FALSE
Alteration of consciousness	mental disorders	291.8	0.016637	365	13153	FALSE
Benign neoplasm of colon	neoplasms	208	0.0169736	324	14243	FALSE
Other disorders of liver	digestive	573	0.0178989	334	13093	FALSE
Symptoms affecting skin	dermatologic	687	0.0188375	84	12274	FALSE
Actinic keratosis	dermatologic	702.1	0.0198458	22	14904	FALSE
Cerebrovascular disease	circulatory system	433	0.0201863	791	14229	FALSE
Paranoid disorders	mental disorders	295.2	0.0202398	47	10313	FALSE
Generalized convulsive epilepsy	neurological	345.11	0.0209804	189	12524	FALSE
Sialoadenitis	digestive	527.2	0.0213553	33	14445	FALSE
Cramp of limb	symptoms	771.2	0.0220997	41	13329	FALSE
Protein-calorie malnutrition	endocrine/metabolic	260	0.0221071	681	11956	FALSE
Senile cataract	sense organs	366.2	0.0224161	755	14749	FALSE
Nasal polyps	respiratory	471	0.0225034	40	10899	FALSE
Antisocial/borderline personality disorder	mental disorders	301.2	0.0225628	35	10301	FALSE
Malignant neoplasm of other urinary organs	neoplasms	189.4	0.023348	44	14913	FALSE
Genital prolapse	genitourinary	618	0.0239583	89	15094	FALSE
Muscular calcification and ossification	musculoskeletal	728.1	0.0248763	21	12473	FALSE
Obstruction of bile duct	digestive	575.2	0.0272244	64	14174	FALSE
Unstable angina (intermediate coronary syndrome)	circulatory system	411.1	0.0280763	239	12990	FALSE
Impaired fasting glucose	endocrine/metabolic	250.41	0.0285642	126	11770	FALSE
Thrombotic microangiopathy	circulatory system	446.8	0.0295077	20	13571	FALSE
Orthostatic hypotension	circulatory system	458.1	0.0297129	114	13322	FALSE
Cerebral artery occlusion, with cerebral infarction	circulatory system	433.21	0.0298054	373	13811	FALSE
Peripheral or central vertigo	sense organs	386.2	0.0298289	69	13499	FALSE
Apnea	respiratory	513.31	0.0304449	45	14068	FALSE
Problems associated with amniotic cavity and membranes	pregnancy complications	653	0.0306042	263	14579	FALSE
Osteitis deformans and osteopathies associated with other disorders classified elsewhere	musculoskeletal	731	0.0306432	42	12879	FALSE
Acute bronchitis and bronchiolitis	respiratory	483	0.0312966	415	12423	FALSE
Keratoconjunctivitis sicca	sense organs	370.31	0.0313271	71	13096	FALSE
Uveitis, noninfectious or NOS	sense organs	371.1	0.0313822	116	13141	FALSE
Acute pulmonary heart disease	circulatory system	415.1	0.0324536	265	13065	FALSE
Urticaria	dermatologic	947	0.0333499	104	12443	FALSE
Secondary diabetes mellitus	endocrine/metabolic	249	0.0351289	112	11756	FALSE
Hemorrhage of rectum and anus	digestive	578.8	0.0360174	199	12619	FALSE
Epilepsy	neurological	345.1	0.036082	385	12720	FALSE
Pain and other symptoms associated with female genital organs	genitourinary	625	0.0371305	395	14014	FALSE
Osteomyelitis	musculoskeletal	710.1	0.0372833	195	13298	FALSE
Hemorrhage in early pregnancy	pregnancy complications	636.3	0.0379288	206	13824	FALSE
Malignant neoplasm, other	neoplasms	195.1	0.0388279	183	12992	FALSE
Mild cognitive impairment	mental disorders	292.2	0.0400252	35	12823	FALSE
Cystic kidney disease	congenital anomalies	751.21	0.0400815	89	14438	FALSE
Abnormal Papanicolaou smear of cervix and cervical HPV	genitourinary	792	0.0416749	521	13624	FALSE
Diffuse diseases of connective tissue	dermatologic	709	0.0435401	237	13524	FALSE
Benign neoplasm of skin	neoplasms	216	0.0437725	105	14785	FALSE
Alcoholism	mental disorders	317.1	0.0447801	247	12331	FALSE
Influenza	respiratory	481	0.0448792	294	12302	FALSE
Cutaneous lupus erythematosus	dermatologic	695.41	0.044985	68	13277	FALSE
Adrenal hyperfunction	endocrine/metabolic	255.1	0.0453802	65	13372	FALSE
Open wound of foot except toe(s) alone	injuries & poisonings	871.3	0.0458909	36	13452	FALSE
Urinary calculus	genitourinary	594	0.0480563	277	14589	FALSE
Encephalitis, non-infectious	neurological	323.8	0.0486361	30	14913	FALSE
Bursitis	musculoskeletal	726.3	0.0487521	121	12573	FALSE
Psychogenic and somatoform disorders	mental disorders	303	0.0487995	78	10344	FALSE
Delirium dementia and amnestic and other cognitive disorders	mental disorders	290	0.0495403	270	13058	FALSE
Other disorders of pancreatic internal secretion	endocrine/metabolic	251	0.0502074	72	13379	FALSE
Psoriasis vulgaris	dermatologic	696.41	0.0518324	57	13067	FALSE
Congenital coagulation defects	hematopoietic	286.1	0.0524804	41	12840	FALSE
Hemiplegia	neurological	342	0.053489	131	12466	FALSE
Personality disorders	mental disorders	301	0.0541195	58	10324	FALSE
Hypoventilation	respiratory	513.3	0.054181	143	14166	FALSE
Diplopia and disorders of binocular vision	sense organs	368.2	0.0560645	60	14130	FALSE
Osteoporosis NOS	musculoskeletal	743.11	0.0562213	233	14008	FALSE
Cataract	sense organs	366	0.0565305	837	14831	FALSE
Neuralgia, neuritis, and radiculitis NOS	symptoms	766	0.0568439	258	14092	FALSE
Peptic ulcer, site unspecified	digestive	531.4	0.0580456	53	14619	FALSE
Paroxysmal ventricular tachycardia	circulatory system	427.12	0.058422	247	11082	FALSE
Hypotension	circulatory system	458	0.0594604	784	13992	FALSE
Dermatophytosis of the body	infectious diseases	110.13	0.0597083	78	12528	FALSE
Chronic pericarditis	circulatory system	420.22	0.0600477	28	14033	FALSE
Intracranial hemorrhage	circulatory system	430	0.0604265	193	13631	FALSE
Megaloblastic anemia	hematopoietic	281.1	0.0604518	116	9331	FALSE
Intestinal infection	infectious diseases	008	0.0609059	265	14600	FALSE
Persistent vomiting	symptoms	789.1	0.0613933	29	11224	FALSE
Other signs and symptoms in breast	genitourinary	613.7	0.0638062	61	14462	FALSE
Hemorrhage during pregnancy; childbirth and postpartum	pregnancy complications	635	0.0645522	164	13782	FALSE
Costochondritis	musculoskeletal	733.6	0.0647952	47	12884	FALSE
Ectopic pregnancy	pregnancy complications	634.3	0.0654223	30	13648	FALSE
Dementias	mental disorders	290.1	0.0667401	191	12979	FALSE
Cancer of bladder	neoplasms	189.2	0.0671159	77	14946	FALSE
Malignant neoplasm of bladder	neoplasms	189.21	0.0671159	77	14946	FALSE
Spina bifida	congenital anomalies	752.11	0.0675727	22	14859	FALSE
Lymphadenitis	hematopoietic	289.4	0.0677131	467	12478	FALSE
Diabetes mellitus	endocrine/metabolic	250	0.0687103	2306	13950	FALSE
Peptic ulcer (excl. esophageal)	digestive	531	0.0692431	158	14724	FALSE
Dermatochalasis	sense organs	374.6	0.0696344	44	13069	FALSE
Disorders resulting from impaired renal function	genitourinary	588	0.0709927	476	11757	FALSE
Poisoning by primarily systemic agents	injuries & poisonings	963	0.0712813	95	12528	FALSE
Lung transplant	respiratory	510.2	0.0721152	25	13484	FALSE
Corneal degenerations	sense organs	364.4	0.072196	31	13792	FALSE
Other anemias	hematopoietic	285	0.0731931	2963	12178	FALSE
Keratoconjunctivitis	sense organs	370.3	0.074158	84	13109	FALSE
Unspecified osteomyelitis	musculoskeletal	710.19	0.0743233	170	13273	FALSE
Partial epilepsy	neurological	345.12	0.0748687	262	12597	FALSE
Sprains and strains	injuries & poisonings	840	0.0755659	479	13510	FALSE
Juvenile rheumatoid arthritis	musculoskeletal	714.2	0.075729	46	13535	FALSE
Esophageal bleeding (varices/hemorrhage)	digestive	530.2	0.076293	64	10977	FALSE
Secondary malignancy of bone	neoplasms	198.6	0.076422	177	12986	FALSE
Other specified nonpsychotic and/or transient mental disorders	mental disorders	291	0.076928	420	13208	FALSE
Curvature of spine	musculoskeletal	737	0.0774862	182	13723	FALSE
Neutropenia	hematopoietic	288.11	0.0792593	246	12257	FALSE
H. pylori	infectious diseases	041.8	0.0794324	56	12743	FALSE
Toxic multinodular goiter	endocrine/metabolic	242.2	0.0796447	41	13353	FALSE
Valvular heart disease/ heart chambers	congenital anomalies	747.12	0.0811511	93	14597	FALSE
Astigmatism	sense organs	367.2	0.0827492	137	14098	FALSE
Systemic sclerosis	dermatologic	709.3	0.0832411	40	13327	FALSE
Irregular menstrual cycle/bleeding	genitourinary	626.1	0.0856093	946	13118	FALSE
Nontoxic nodular goiter	endocrine/metabolic	241	0.08735	353	13665	FALSE
Infectious and parasitic complications affecting pregnancy	pregnancy complications	647	0.0880872	99	14560	FALSE
Type 2 diabetes	endocrine/metabolic	250.2	0.088644	2247	13891	FALSE
Ganglion and cyst of synovium, tendon, and bursa	musculoskeletal	727.4	0.0887915	81	12533	FALSE
Cancer of oropharynx	neoplasms	149.1	0.0891884	38	14952	FALSE
Antineoplastic and immunosuppressive drugs causing adverse effects	injuries & poisonings	963.1	0.0903035	91	12524	FALSE
Disorders of the autonomic nervous system	neurological	337	0.0905842	42	12377	FALSE
Absent or infrequent menstruation	genitourinary	626.11	0.091207	204	12376	FALSE
Disorders of the globe	sense organs	360	0.0912465	49	13810	FALSE
severe protein-calorie malnutrition	endocrine/metabolic	260.2	0.092634	248	11523	FALSE
Alcoholic liver damage	mental disorders	317.11	0.0928288	53	12137	FALSE
Renal failure NOS	genitourinary	585.2	0.0934222	283	11564	FALSE
Drusen (degenerative) of retina	sense organs	362.27	0.0936206	26	13661	FALSE
Pulmonary embolism and infarction, acute	circulatory system	415.11	0.0940079	242	13042	FALSE
Congenital hip dysplasia and deformity	congenital anomalies	755.61	0.0944041	37	14791	FALSE
Ovarian cyst	genitourinary	628	0.0949442	236	12408	FALSE
Precordial pain	circulatory system	418.1	0.0950804	295	10600	FALSE
Cystitis	genitourinary	592.1	0.095734	228	11666	FALSE
Varicose veins	circulatory system	454	0.0966188	79	12637	FALSE
Chronic pancreatitis	digestive	577.2	0.0970393	63	14786	FALSE
Multiple sclerosis	neurological	335	0.0972515	177	12512	FALSE
Other congenital anomalies of lower limb, including pelvic girdle	congenital anomalies	755.6	0.0974952	45	14799	FALSE
Benign neoplasm of brain and other parts of nervous system	neoplasms	225	0.0986841	65	14934	FALSE
Intestinal infection due to C. difficile	infectious diseases	008.52	0.0999036	104	14439	FALSE
Gastric ulcer	digestive	531.2	0.101348	42	14608	FALSE
Osteoarthrosis NOS	musculoskeletal	740.9	0.10362	870	13659	FALSE
Benign neoplasm of ovary	neoplasms	220	0.104645	65	13469	FALSE
Disorders of muscle, ligament, and fascia	musculoskeletal	728	0.107179	28	12480	FALSE
Malignant neoplasm of rectum, rectosigmoid junction, and anus	neoplasms	153.3	0.107313	176	13791	FALSE
Calcaneal spur; Exostosis NOS	musculoskeletal	726.4	0.108038	28	12480	FALSE
Symptoms of the muscles	symptoms	772	0.108872	73	13433	FALSE
Corneal ulcer	sense organs	370.1	0.10921	23	13048	FALSE
Benign neoplasm of brain, cranial nerves, meninges	neoplasms	225.1	0.109341	61	14930	FALSE
Gastroparesis	digestive	536.3	0.111683	105	13571	FALSE
Congenital anomalies of peripheral vascular system	congenital anomalies	747.2	0.113246	53	14557	FALSE
Acquired hemolytic anemias	hematopoietic	283	0.11379	113	9328	FALSE
Solitary pulmonary nodule	respiratory	514.2	0.11523	183	14182	FALSE
Pain	neurological	338	0.115269	1706	13941	FALSE
Frequency of urination and polyuria	genitourinary	599.5	0.115571	489	12065	FALSE
Renal osteodystrophy	genitourinary	588.1	0.116855	382	11663	FALSE
Chronic hepatitis	infectious diseases	070.4	0.11703	60	11470	FALSE
Disorders of menstruation and other abnormal bleeding from female genital tract	genitourinary	626	0.117059	1113	13285	FALSE
Postmenopausal atrophic vaginitis	genitourinary	627.3	0.117705	91	12263	FALSE
Orchitis and epididymitis	genitourinary	601.3	0.118186	35	14221	FALSE
Tension headache	mental disorders	306.9	0.120045	50	10316	FALSE
Polymyositis	dermatologic	709.4	0.120905	33	13320	FALSE
Dermatomycoses	infectious diseases	110.2	0.121634	32	12482	FALSE
Alzheimer's disease	mental disorders	290.11	0.123022	65	12853	FALSE
Syncope and collapse	symptoms	788	0.123079	681	14531	FALSE
Pneumonia due to fungus (mycoses)	respiratory	480.3	0.123942	44	12052	FALSE
Papanicolaou smear of cervix or vagina with atypical squamous cells	genitourinary	792.1	0.124054	496	13599	FALSE
Acute pain	neurological	338.1	0.124849	1135	13370	FALSE
Hyperaldosteronism	endocrine/metabolic	255.12	0.125288	36	13343	FALSE
Cystitis and urethritis	genitourinary	592	0.125466	251	11689	FALSE
Kyphoscoliosis and scoliosis	musculoskeletal	737.3	0.126164	160	13701	FALSE
Cancer of kidney and renal pelvis	neoplasms	189.1	0.126351	139	15008	FALSE
Vitamin B-complex deficiencies	endocrine/metabolic	261.2	0.12651	270	11545	FALSE
Hypotension NOS	circulatory system	458.9	0.126966	697	13905	FALSE
Acute renal failure	genitourinary	585.1	0.127083	1559	12840	FALSE
Restless legs syndrome	neurological	327.71	0.127144	65	12461	FALSE
Toxic effect of venom	injuries & poisonings	913	0.12875	20	14650	FALSE
Other infectious and parasitic diseases	infectious diseases	136	0.129734	107	14277	FALSE
Placenta previa and abruptio placenta	pregnancy complications	635.3	0.130565	54	13672	FALSE
Autism	mental disorders	313.3	0.131134	89	14014	FALSE
Hearing loss	sense organs	389	0.131715	456	14636	FALSE
Known or suspected fetal abnormality affecting management of mother	pregnancy complications	655	0.131824	945	14633	FALSE
Fracture of hand or wrist	injuries & poisonings	804	0.131824	175	13099	FALSE
Disorders of phosphorus metabolism	endocrine/metabolic	275.53	0.132306	214	14035	FALSE
Inguinal hernia	digestive	550.1	0.133047	160	13917	FALSE
Complex regional/central pain syndrome	neurological	355	0.134795	43	13753	FALSE
Cancer of connective tissue	neoplasms	170.2	0.13499	94	15048	FALSE
Acute osteomyelitis	musculoskeletal	710.11	0.136885	60	13163	FALSE
Symptoms involving head and neck	mental disorders	293	0.137029	45	14132	FALSE
Benign neoplasm of respiratory and intrathoracic organs	neoplasms	212	0.137467	36	15126	FALSE
Pathologic fracture	musculoskeletal	743.2	0.138099	82	13857	FALSE
Arthropathy associated with infections	musculoskeletal	711	0.13886	69	13172	FALSE
Occlusion and stenosis of precerebral arteries	circulatory system	433.1	0.142192	185	13623	FALSE
Pelvic inflammatory disease, NOS	genitourinary	614.33	0.143382	69	13268	FALSE
Stricture and stenosis of esophagus	digestive	530.3	0.143463	80	10993	FALSE
Diseases of spleen	hematopoietic	289.5	0.143674	76	12087	FALSE
Pilonidal cyst	dermatologic	686.3	0.14373	22	12523	FALSE
Fracture of patella	injuries & poisonings	800.4	0.143867	46	12970	FALSE
Symptomatic menopause	genitourinary	627.2	0.144416	301	12473	FALSE
Gram positive septicemia	infectious diseases	038.2	0.145409	114	12801	FALSE
Open wound of hand except finger(s)	injuries & poisonings	871.1	0.145487	43	13459	FALSE
Toxic maculopathy of retina	sense organs	362.5	0.14557	34	13669	FALSE
Abnormal posture	symptoms	781.2	0.148799	117	14700	FALSE
E. coli	infectious diseases	041.4	0.149307	281	12968	FALSE
Congenital anomaly of gallbladder, bile ducts, liver, pancreas	congenital anomalies	750.22	0.150108	22	14371	FALSE
Hypercalcemia	endocrine/metabolic	275.6	0.150513	181	14002	FALSE
Benign neoplasm of pituitary gland and craniopharyngeal duct (pouch)	neoplasms	227.3	0.151118	61	14855	FALSE
Dyshidrosis	dermatologic	705.1	0.151503	43	13920	FALSE
Calculus of kidney	genitourinary	594.1	0.152016	238	14550	FALSE
Hallux rigidus	musculoskeletal	735.23	0.152675	24	13565	FALSE
Gross hematuria	genitourinary	593.1	0.152753	113	11551	FALSE
Cancer of larynx, pharynx, nasal cavities	neoplasms	149	0.153131	119	15033	FALSE
Osteoarthrosis	musculoskeletal	740	0.15405	1395	14184	FALSE
Symptoms involving skin and other integumentary tissue	symptoms	782	0.15475	51	12931	FALSE
Hydronephrosis	genitourinary	595	0.154903	219	14531	FALSE
Simple and unspecified goiter	endocrine/metabolic	240	0.157136	128	13440	FALSE
Other benign neoplasm of connective and other soft tissue	neoplasms	215	0.15736	32	14901	FALSE
Threatened premature labor	pregnancy complications	636.1	0.158201	275	13893	FALSE
Cancer within the respiratory system	neoplasms	165	0.159105	200	15063	FALSE
Conduct disorders	mental disorders	312	0.159136	222	14147	FALSE
Poisoning by analgesics, antipyretics, and antirheumatics	injuries & poisonings	965	0.159237	125	12558	FALSE
Suppurative and unspecified otitis media	sense organs	381.11	0.159315	477	13769	FALSE
Myoclonus	neurological	333.2	0.159829	35	12370	FALSE
Bone cancer	neoplasms	170.1	0.160279	49	15003	FALSE
Complication of nervous system device, implant, and graft	injuries & poisonings	855	0.16215	68	13592	FALSE
Paralytic ileus	digestive	560.1	0.162671	169	11739	FALSE
Neural tube defects	congenital anomalies	752.1	0.16325	31	14868	FALSE
Lipoprotein disorders	endocrine/metabolic	277.51	0.164343	22	14422	FALSE
Gingivitis	digestive	523.1	0.165042	97	13721	FALSE
Hypercoagulable state	hematopoietic	286.8	0.166099	70	12869	FALSE
Cerebral aneurysm	circulatory system	433.5	0.167802	64	13502	FALSE
Sepsis and SIRS	injuries & poisonings	994	0.168197	735	14910	FALSE
Gastritis and duodenitis	digestive	535	0.168199	238	13704	FALSE
Otitis media	sense organs	381.1	0.169192	533	13825	FALSE
Intracerebral hemorrhage	circulatory system	430.2	0.169777	116	13554	FALSE
Cancer of bronchus; lung	neoplasms	165.1	0.16986	199	15062	FALSE
Other CNS infection and poliomyelitis	neurological	324	0.171165	37	14920	FALSE
Paralysis/spasm of vocal cords or larynx	respiratory	473.3	0.17317	48	10907	FALSE
Sepsis	injuries & poisonings	994.2	0.174915	679	14854	FALSE
Irregular menstrual bleeding	genitourinary	626.14	0.175514	100	12272	FALSE
Pernicious anemia	hematopoietic	281.11	0.175709	39	9254	FALSE
Tuberculosis	infectious diseases	010	0.175875	30	12717	FALSE
Chronic pulmonary heart disease	circulatory system	415.2	0.176077	453	13253	FALSE
Postnasal drip	respiratory	475.9	0.176168	63	10922	FALSE
Fracture of vertebral column without mention of spinal cord injury	injuries & poisonings	805	0.176341	172	13096	FALSE
Retinal edema	sense organs	362.9	0.176817	80	13715	FALSE
Paroxysmal supraventricular tachycardia	circulatory system	427.11	0.176939	175	11010	FALSE
First degree AV block	circulatory system	426.21	0.177662	31	10866	FALSE
Disorders of protein plasma/amino-acid transport and metabolism	endocrine/metabolic	270	0.178674	173	14254	FALSE
Congenital anomalies of great vessels	congenital anomalies	747.13	0.179106	106	14610	FALSE
Convulsions	neurological	345.3	0.180276	735	13070	FALSE
Psoriasis	dermatologic	696.4	0.181662	67	13077	FALSE
Intervertebral disc disorder with myelopathy	musculoskeletal	722.7	0.182208	45	13059	FALSE
Degenerative disease of the spinal cord	neurological	334	0.182215	107	12442	FALSE
Other hypertrophic cardiomyopathy	circulatory system	425.12	0.184208	25	14030	FALSE
Inflammatory diseases of female pelvic organs	genitourinary	614	0.184412	788	13987	FALSE
Osteopenia or other disorder of bone and cartilage	musculoskeletal	743.9	0.185433	360	14135	FALSE
Primary open angle glaucoma	sense organs	365.11	0.185861	172	13933	FALSE
Anemia in chronic kidney disease	hematopoietic	285.21	0.185982	469	9684	FALSE
Secondary malignancy of lymph nodes	neoplasms	198.1	0.18654	308	13117	FALSE
Bacterial enteritis	infectious diseases	008.5	0.188498	134	14469	FALSE
Difficulty in walking	musculoskeletal	741.3	0.188645	255	13113	FALSE
Menopausal and postmenopausal disorders	genitourinary	627	0.18908	530	12702	FALSE
Poisoning/allergy of sulfonamides	injuries & poisonings	961.1	0.18939	101	12534	FALSE
Prolapse of vaginal walls	genitourinary	618.1	0.189518	62	15067	FALSE
Alcohol-related disorders	mental disorders	317	0.189566	345	12429	FALSE
Elevated C-reactive protein (CRP)	symptoms	790.8	0.189839	26	14621	FALSE
Cerebral cysts	neurological	348.4	0.190708	36	12371	FALSE
Transient mental disorders due to conditions classified elsewhere	mental disorders	291.1	0.190789	24	12812	FALSE
Spondylosis with myelopathy	musculoskeletal	721.2	0.191542	90	13104	FALSE
Chronic fatigue syndrome	symptoms	798.1	0.192522	110	9990	FALSE
Polyarteritis nodosa and allied conditions	circulatory system	446	0.192913	78	13629	FALSE
Chronic liver disease and cirrhosis	digestive	571	0.193426	599	13358	FALSE
Other disorders of the kidney and ureters	genitourinary	586	0.194567	886	12167	FALSE
Bladder neck obstruction	genitourinary	596.1	0.194705	34	14009	FALSE
Subdural hemorrhage	circulatory system	430.3	0.198469	51	13489	FALSE
Other disorders of eyelids	sense organs	374	0.198728	116	13141	FALSE
Anemia of chronic disease	hematopoietic	285.2	0.198867	857	10072	FALSE
Renal failure	genitourinary	585	0.199322	2499	13780	FALSE
Abnormality of gait	neurological	350.2	0.199592	491	14156	FALSE
Congenital anomalies of male genital organs	congenital anomalies	751.12	0.200183	84	14433	FALSE
Pelvic inflammatory disease (PID)	genitourinary	614.3	0.200316	120	13319	FALSE
Peripheral enthesopathies and allied syndromes	musculoskeletal	726	0.200998	805	13257	FALSE
Dyspareunia	genitourinary	625.1	0.202138	40	13659	FALSE
Hypoglycemia	endocrine/metabolic	251.1	0.203619	183	10891	FALSE
Edema	symptoms	782.3	0.205583	1136	14016	FALSE
Nontoxic uninodular goiter	endocrine/metabolic	241.1	0.206299	131	13443	FALSE
Phlebitis and thrombophlebitis	circulatory system	451	0.207265	69	12627	FALSE
Fracture of unspecified part of femur	injuries & poisonings	800.2	0.207572	93	13017	FALSE
Disturbance of salivary secretion	digestive	527.7	0.208538	64	14476	FALSE
Myeloid leukemia, chronic	neoplasms	204.22	0.208971	31	14851	FALSE
Sleep related movement disorders	neurological	327.7	0.209273	80	12476	FALSE
Raynaud's syndrome	circulatory system	443.1	0.209355	41	13592	FALSE
Mechanical complication of unspecified genitourinary device, implant, and graft	injuries & poisonings	857	0.209385	30	13554	FALSE
Disorder of skin and subcutaneous tissue NOS	dermatologic	689	0.210161	156	14734	FALSE
Septic shock	injuries & poisonings	994.21	0.210267	194	14369	FALSE
Keratitis	sense organs	370	0.210673	126	13151	FALSE
Acute vascular insufficiency of intestine	circulatory system	441.1	0.210875	23	13574	FALSE
Mammographic microcalcification	genitourinary	611.11	0.210915	63	13749	FALSE
Cachexia	endocrine/metabolic	260.1	0.211393	63	11338	FALSE
Congenital anomalies of urinary system	congenital anomalies	751.2	0.212237	134	14483	FALSE
Secondary malignant neoplasm of liver	neoplasms	198.4	0.212667	188	12997	FALSE
Peripheral vascular disease, unspecified	circulatory system	443.9	0.212815	291	13842	FALSE
Pancytopenia	hematopoietic	284.1	0.213471	153	9368	FALSE
Eye infection, viral	sense organs	369.2	0.213686	34	13059	FALSE
Acute appendicitis	digestive	540.11	0.213752	59	15094	FALSE
Appendiceal conditions	digestive	540	0.214274	65	15100	FALSE
Kidney replaced by transpant	genitourinary	587	0.214571	352	11633	FALSE
Other dyschromia	dermatologic	694.2	0.214782	110	13513	FALSE
Preeclampsia and eclampsia	pregnancy complications	642.1	0.215078	182	14779	FALSE
Need for Hormone replacement therapy (postmenopausal)	genitourinary	627.22	0.215474	34	12206	FALSE
Cervical intraepithelial neoplasia [CIN] [Cervical dysplasia]	neoplasms	180.3	0.21608	233	13336	FALSE
Infections of genitourinary tract during pregnancy	pregnancy complications	647.1	0.216132	181	14642	FALSE
Polyp of female genital organs	genitourinary	622	0.216601	88	14850	FALSE
Diabetic retinopathy	endocrine/metabolic	250.7	0.216704	274	13909	FALSE
Fasciitis	musculoskeletal	728.7	0.217053	144	12596	FALSE
Ischemic Heart Disease	circulatory system	411	0.218154	1238	13989	FALSE
Disorders of conjunctiva	sense organs	372	0.21875	78	13103	FALSE
Sciatica	symptoms	764	0.220338	289	14123	FALSE
Other vitamin B12 deficiency anemia	hematopoietic	281.12	0.220505	85	9300	FALSE
Fever of unknown origin	symptoms	783	0.221867	2081	13567	FALSE
Diseases of the jaws	digestive	526	0.223847	91	13715	FALSE
Abnormal heart sounds	circulatory system	396	0.224185	380	13379	FALSE
Early onset of delivery	pregnancy complications	636.2	0.224835	156	13774	FALSE
Osteomyelitis, periostitis, and other infections involving bone	musculoskeletal	710	0.224907	256	13359	FALSE
Palpitations	circulatory system	427.9	0.225668	651	11486	FALSE
Pneumococcal pneumonia	respiratory	480.11	0.225674	82	12090	FALSE
Malignant neoplasm of kidney, except pelvis	neoplasms	189.11	0.22619	129	14998	FALSE
Chronic pain syndrome	neurological	355.1	0.22631	171	13881	FALSE
Other disorders of testis	genitourinary	603	0.227843	52	13819	FALSE
Other and unspecified coagulation defects	hematopoietic	286.7	0.228199	331	13130	FALSE
Acute reaction to stress	mental disorders	300.8	0.228697	34	10300	FALSE
Paroxysmal tachycardia, unspecified	circulatory system	427.1	0.229064	393	11228	FALSE
Altered mental status	mental disorders	292.4	0.230149	770	13558	FALSE
Diverticulosis and diverticulitis	digestive	562	0.230903	357	11927	FALSE
Other chronic ischemic heart disease, unspecified	circulatory system	411.8	0.230974	300	13051	FALSE
Inflammatory disease of cervix, vagina, and vulva	genitourinary	614.5	0.232284	622	13821	FALSE
Neoplasm of uncertain behavior of skin	neoplasms	173	0.236488	95	14749	FALSE
Nontoxic multinodular goiter	endocrine/metabolic	241.2	0.236694	266	13578	FALSE
Mineral deficiency NEC	endocrine/metabolic	262	0.23744	79	11354	FALSE
Multiple myeloma	neoplasms	204.4	0.237976	33	14853	FALSE
Psychogenic disorder	mental disorders	303.3	0.238006	26	10292	FALSE
Specific nonpsychotic mental disorders due to brain damage	mental disorders	291.4	0.238428	49	12837	FALSE
Scleritis and episcleritis	sense organs	379.1	0.238964	46	13538	FALSE
Disorders of tooth development	digestive	520	0.239559	91	13715	FALSE
Complications of transplants and reattached limbs	injuries & poisonings	851	0.243293	115	13639	FALSE
Adult failure to thrive	endocrine/metabolic	260.3	0.243338	174	11449	FALSE
Cervical cancer and dysplasia	neoplasms	180	0.243726	260	13363	FALSE
Venereal diseases due to Chlamydia trachomatis	infectious diseases	090.3	0.244163	28	14657	FALSE
Postinflammatory pulmonary fibrosis	respiratory	502	0.245454	90	11723	FALSE
Otitis media and Eustachian tube disorders	sense organs	381	0.24585	679	13971	FALSE
Lupus (localized and systemic)	dermatologic	695.4	0.246223	305	13514	FALSE
Coma	neurological	348.7	0.246397	42	12377	FALSE
Chronic pain	neurological	338.2	0.247639	835	13070	FALSE
Chronic pharyngitis and nasopharyngitis	respiratory	472	0.247653	276	11135	FALSE
Visual disturbances	sense organs	368	0.248909	321	14391	FALSE
Osteoarthrosis, generalized	musculoskeletal	740.2	0.248974	339	13128	FALSE
Disorders of magnesium metabolism	endocrine/metabolic	275.3	0.249586	229	14050	FALSE
Cervical radiculitis	symptoms	765	0.249992	176	14010	FALSE
Schizophrenia	mental disorders	295.1	0.252036	181	10447	FALSE
Gastrointestinal hemorrhage	digestive	578	0.252258	732	13152	FALSE
Symptoms involving cardiovascular system	circulatory system	429.3	0.253051	159	13165	FALSE
Other symptoms involving urinary system	genitourinary	599.8	0.254476	37	11613	FALSE
Myasthenia gravis	neurological	358.1	0.254666	21	14030	FALSE
Vertiginous syndromes and other disorders of vestibular system	sense organs	386	0.255095	102	13532	FALSE
Other chronic nonalcoholic liver disease	digestive	571.5	0.25516	556	13315	FALSE
Vaginitis and vulvovaginitis	genitourinary	614.52	0.255743	540	13739	FALSE
Fracture of humerus	injuries & poisonings	803.1	0.256426	94	13018	FALSE
Cardiac congenital anomalies	congenital anomalies	747.1	0.25655	357	14861	FALSE
Sebaceous cyst	dermatologic	706.2	0.259426	148	14025	FALSE
Contracture of tendon (sheath)	musculoskeletal	727.7	0.260412	36	12488	FALSE
Appendicitis	digestive	540.1	0.261503	64	15099	FALSE
Retention of urine	genitourinary	599.2	0.261673	292	11868	FALSE
Hypertrophy of female genital organs	genitourinary	623	0.262618	53	14815	FALSE
Epilepsy, recurrent seizures, convulsions	neurological	345	0.264166	842	13177	FALSE
Type 1 diabetes	endocrine/metabolic	250.1	0.266119	436	12080	FALSE
Morbid obesity	endocrine/metabolic	278.11	0.26668	1086	11819	FALSE
Other diseases of the teeth and supporting structures	digestive	525	0.266838	123	13747	FALSE
Impacted cerumen	sense organs	380.4	0.267101	235	14530	FALSE
Non-Hodgkins lymphoma	neoplasms	202.2	0.267846	34	14854	FALSE
Back pain	symptoms	760	0.267853	1993	13576	FALSE
Pseudomonal pneumonia	respiratory	480.12	0.267886	29	12037	FALSE
Subarachnoid hemorrhage	circulatory system	430.1	0.268574	70	13508	FALSE
Other disorders of thyroid	endocrine/metabolic	246	0.268576	97	13409	FALSE
Traumatic and surgical subcutaneous emphysema	injuries & poisonings	958.2	0.270262	21	14983	FALSE
Gram negative septicemia	infectious diseases	038.1	0.270517	158	12845	FALSE
Short stature	endocrine/metabolic	264.1	0.271067	70	11345	FALSE
Polycythemia, secondary	hematopoietic	289.8	0.271376	23	11994	FALSE
Diabetes or abnormal glucose tolerance complicating pregnancy	pregnancy complications	649.1	0.27586	186	13903	FALSE
Other specified diffuse diseases of connective tissue	dermatologic	709.6	0.276096	50	13337	FALSE
Nonrheumatic mitral valve disorders	circulatory system	395.1	0.276498	419	13418	FALSE
Cancer, suspected or other	neoplasms	195	0.277126	381	13190	FALSE
Dizziness and giddiness (Light-headedness and vertigo)	sense organs	386.9	0.278358	721	14151	FALSE
Other cerebral degenerations	neurological	331	0.279556	180	12515	FALSE
Open wounds of head; neck; and trunk	injuries & poisonings	870	0.280538	268	13684	FALSE
Sensorineural hearing loss	sense organs	389.1	0.281986	213	14393	FALSE
Intestinal disaccharidase deficiencies and disaccharide malabsorption	endocrine/metabolic	271.3	0.281992	117	15091	FALSE
Carbuncle and furuncle	dermatologic	686.1	0.282593	57	12558	FALSE
Osteoporosis, osteopenia and pathological fracture	musculoskeletal	743	0.283543	672	14447	FALSE
Disorders of carbohydrate transport and metabolism	endocrine/metabolic	271	0.284425	129	15103	FALSE
Inflammation of the eye	sense organs	371	0.285016	413	13438	FALSE
Benign neoplasm of other endocrine glands and related structures	neoplasms	227	0.28631	116	14910	FALSE
Dyschromia and Vitiligo	dermatologic	694	0.286975	134	13537	FALSE
Traumatic amputation	injuries & poisonings	872	0.287497	35	13451	FALSE
Hemorrhage from gastrointestinal ulcer	digestive	531.1	0.288252	22	14588	FALSE
Hypocalcemia	endocrine/metabolic	275.51	0.288756	130	13951	FALSE
Type 1 diabetes with ketoacidosis	endocrine/metabolic	250.11	0.290607	91	11735	FALSE
Disorders of optic nerve and visual pathways	sense organs	377	0.291338	105	13597	FALSE
Disorders of sacrum	musculoskeletal	724.1	0.291754	29	13043	FALSE
Type 2 diabetes with ophthalmic manifestations	endocrine/metabolic	250.23	0.292619	276	11920	FALSE
Other specified congenital anomalies of kidney	congenital anomalies	751.22	0.292787	44	14393	FALSE
Poisoning by antibiotics	injuries & poisonings	960	0.292809	254	12687	FALSE
Diseases of sebaceous glands	dermatologic	706	0.29322	424	14301	FALSE
Injuries to the nervous system	injuries & poisonings	907	0.293306	62	15051	FALSE
Conjunctivitis, infectious	sense organs	369.5	0.293746	230	13255	FALSE
Retinal detachment with retinal defect	sense organs	361.1	0.293765	21	13782	FALSE
Paraproteinemia	endocrine/metabolic	270.32	0.294155	81	14162	FALSE
Septicemia	infectious diseases	038	0.294237	913	13600	FALSE
Anemia during pregnancy	pregnancy complications	644	0.294597	119	14792	FALSE
Hypercholesterolemia	endocrine/metabolic	272.11	0.294762	822	12303	FALSE
Gouty arthropathy	endocrine/metabolic	274.11	0.29504	196	14617	FALSE
Anemia in neoplastic disease	hematopoietic	285.22	0.295256	263	9478	FALSE
Hypothyroidism	endocrine/metabolic	244	0.29533	701	14013	FALSE
Acute, but ill-defined cerebrovascular disease	circulatory system	433.6	0.295847	123	13561	FALSE
Polyp of corpus uteri	genitourinary	622.1	0.295989	74	14836	FALSE
Malaise and fatigue	symptoms	798	0.296017	2981	12861	FALSE
Iron deficiency anemias, unspecified or not due to blood loss	hematopoietic	280.1	0.296981	873	10088	FALSE
Vascular insufficiency of intestine	circulatory system	441	0.299372	49	13600	FALSE
Excessive or frequent menstruation	genitourinary	626.12	0.299467	487	12659	FALSE
Other alveolar and parietoalveolar pneumonopathy	respiratory	504	0.299627	66	11699	FALSE
Concussion	injuries & poisonings	817	0.29971	43	14595	FALSE
Other diseases of respiratory system, NEC	respiratory	519.8	0.300267	67	13893	FALSE
Disorders of mineral metabolism	endocrine/metabolic	275	0.300343	692	14513	FALSE
Chronic airway obstruction	respiratory	496	0.301872	556	12588	FALSE
Cancer of brain	neoplasms	191.11	0.302399	68	14937	FALSE
Suicidal ideation	mental disorders	297.1	0.302852	221	10487	FALSE
Swelling of limb	symptoms	771.1	0.30472	780	14068	FALSE
Pulmonary heart disease	circulatory system	415	0.304747	681	13481	FALSE
Ulcerative colitis (chronic)	digestive	555.21	0.306508	52	11622	FALSE
Viral Enteritis	infectious diseases	008.6	0.310604	106	14441	FALSE
Infection of the eye	sense organs	369	0.311488	278	13303	FALSE
Anorexia	endocrine/metabolic	260.6	0.312716	129	11404	FALSE
Type 1 diabetes with renal manifestations	endocrine/metabolic	250.12	0.312776	74	11718	FALSE
Other symptoms referable to back	musculoskeletal	724.8	0.313395	44	13058	FALSE
Other disorders of eye	sense organs	379	0.313876	317	13809	FALSE
Dry eyes	sense organs	375.1	0.313937	294	13786	FALSE
Ill-defined descriptions and complications of heart disease	circulatory system	429	0.314041	218	13224	FALSE
Hypothyroidism NOS	endocrine/metabolic	244.4	0.314516	620	13932	FALSE
Otitis externa	sense organs	380.1	0.314528	91	14386	FALSE
Hirsutism	dermatologic	704.2	0.317344	61	14200	FALSE
Osteoporosis	musculoskeletal	743.1	0.317639	316	14091	FALSE
Type 2 diabetes with neurological manifestations	endocrine/metabolic	250.24	0.318703	524	12168	FALSE
Prurigo and Lichen	dermatologic	695.7	0.320837	49	13452	FALSE
Ulcerative colitis	digestive	555.2	0.321153	106	11676	FALSE
Prolapse of vaginal vault after hysterectomy	genitourinary	618.5	0.321659	22	15027	FALSE
Cellulitis and abscess of trunk	dermatologic	681.7	0.322778	271	12772	FALSE
Disorders of parathyroid gland	endocrine/metabolic	252	0.32397	184	13491	FALSE
Viremia, NOS	infectious diseases	079.9	0.324276	107	11517	FALSE
Diverticulitis	digestive	562.2	0.324685	78	11648	FALSE
Glaucoma	sense organs	365	0.324751	519	14280	FALSE
Other hereditary hemolytic anemias	hematopoietic	282.9	0.324887	231	9446	FALSE
Diverticulosis	digestive	562.1	0.324961	320	11890	FALSE
Fracture of unspecified bones	injuries & poisonings	809	0.325021	534	13458	FALSE
Elevated sedimentation rate	symptoms	790.1	0.325847	37	14632	FALSE
Subjective visual disturbances	sense organs	368.9	0.326325	86	14156	FALSE
Mastodynia	genitourinary	613.5	0.326795	157	14558	FALSE
Synovitis and tenosynovitis	musculoskeletal	727.1	0.326896	294	12746	FALSE
Other disorders of peritoneum	digestive	568	0.326958	163	13295	FALSE
Myeloproliferative disease	neoplasms	200	0.328158	94	14914	FALSE
Nutritional marasmus	endocrine/metabolic	260.22	0.329662	28	11303	FALSE
Other arthropathies	musculoskeletal	716	0.331684	297	13400	FALSE
Disorders of penis	genitourinary	604	0.332062	143	13910	FALSE
Infections specific to the perinatal period	pregnancy complications	657	0.333307	29	15075	FALSE
Attention deficit hyperactivity disorder	mental disorders	313.1	0.335736	303	14228	FALSE
Impaction of intestine	digestive	560.2	0.335936	39	11609	FALSE
Viral infection	infectious diseases	079	0.336551	775	12185	FALSE
Cancer of brain and nervous system	neoplasms	191.1	0.3369	72	14941	FALSE
Heart transplant/surgery	circulatory system	429.1	0.338447	133	13139	FALSE
Rash and other nonspecific skin eruption	dermatologic	687.1	0.338624	731	12921	FALSE
Other conditions of brain	neurological	348	0.339173	508	12843	FALSE
Antepartum hemorrhage, abruptio placentae, and placenta previa	pregnancy complications	635.2	0.339224	115	13733	FALSE
Cancer of tongue	neoplasms	145.2	0.339288	24	14938	FALSE
Complications of labor and delivery NEC	pregnancy complications	669	0.339506	52	15016	FALSE
Cerebral degeneration, unspecified	neurological	331.9	0.340369	50	12385	FALSE
Other nondiabetic retinopathy	sense organs	362.3	0.340986	125	13760	FALSE
Congenital anomalies of limbs	congenital anomalies	755	0.341379	92	14846	FALSE
Disorders of plasma protein metabolism	endocrine/metabolic	270.3	0.342797	147	14228	FALSE
Localized adiposity	endocrine/metabolic	278.3	0.342817	58	10791	FALSE
Cancer of bone and connective tissue	neoplasms	170	0.34372	127	15081	FALSE
Calculus of bile duct	digestive	574.2	0.344449	39	14149	FALSE
Pervasive developmental disorders	mental disorders	313	0.344619	393	14318	FALSE
Sprains and strains of back and neck	injuries & poisonings	841	0.34623	204	13235	FALSE
Other peripheral nerve disorders	neurological	351	0.346365	498	14208	FALSE
Hereditary and idiopathic peripheral neuropathy	neurological	356	0.347834	206	14215	FALSE
Anomalies of respiratory system, congenital	congenital anomalies	748	0.347852	65	14937	FALSE
Calculus of ureter	genitourinary	594.3	0.348235	56	14368	FALSE
Postmenopausal bleeding	genitourinary	627.1	0.348468	95	12267	FALSE
Dermatomyositis	dermatologic	709.5	0.348563	34	13321	FALSE
Otalgia	sense organs	382	0.349488	165	13457	FALSE
Diseases of pancreas	digestive	577	0.349901	246	14969	FALSE
Mitral valve disease	circulatory system	394.2	0.350197	42	13041	FALSE
Other non-epithelial cancer of skin	neoplasms	172.2	0.350339	44	14698	FALSE
Inflammatory and toxic neuropathy	neurological	357	0.350398	254	14263	FALSE
Nonspecific abnormal findings in stool contents	digestive	579.8	0.350423	29	12449	FALSE
Complication of internal orthopedic device	injuries & poisonings	858	0.350854	122	13646	FALSE
Hemorrhage NOS	circulatory system	459.1	0.352708	38	13246	FALSE
Nephrotic syndrome without mention of glomerulonephritis	genitourinary	580.2	0.35351	94	11375	FALSE
Complications of gastrostomy, colostomy and enterostomy	digestive	536.7	0.35359	84	13550	FALSE
Portal hypertension	digestive	571.81	0.354371	78	12837	FALSE
Noninflammatory disorders of vulva and perineum	genitourinary	619.5	0.356612	52	13705	FALSE
Heart failure with reduced EF [Systolic or combined heart failure]	circulatory system	428.3	0.357842	574	13580	FALSE
Disorders of bilirubin excretion	endocrine/metabolic	277.4	0.358391	56	14456	FALSE
Other endocrine disorders	endocrine/metabolic	259	0.358433	45	13352	FALSE
Decreased white blood cell count	hematopoietic	288.1	0.35997	363	12374	FALSE
Facial nerve disorders [CN7]	neurological	352.2	0.360915	55	13765	FALSE
Nonspecific elevation of levels of transaminase or lactic acid dehydrogenase [LDH]	digestive	573.6	0.361007	70	12829	FALSE
Respiratory failure, insufficiency, arrest	respiratory	509	0.36139	1183	12816	FALSE
Endometriosis	genitourinary	615	0.362424	101	13300	FALSE
Diseases of nail, NOS	dermatologic	703	0.364146	53	14192	FALSE
Conditions involving the integument and temperature regulation of fetus and newborn	pregnancy complications	656.7	0.364426	39	14654	FALSE
Short gestation; low birth weight; and fetal growth retardation	pregnancy complications	637	0.365078	37	13584	FALSE
Hypertensive heart and/or renal disease	circulatory system	401.2	0.365203	1626	10185	FALSE
Heart failure NOS	circulatory system	428.2	0.367429	398	13404	FALSE
Cyst and pseudocyst of pancreas	digestive	577.3	0.367548	53	14776	FALSE
Coagulation defects	hematopoietic	286	0.36779	491	13290	FALSE
Radiotherapy	neoplasms	196	0.368722	346	13155	FALSE
Amblyopia	sense organs	368.1	0.369996	46	14116	FALSE
Heartburn	digestive	530.9	0.370882	60	10973	FALSE
Nonrheumatic tricuspid valve disorders	circulatory system	395.3	0.371864	112	13111	FALSE
Cancer of other female genital organs (excluding uterus and ovary)	neoplasms	184.2	0.371926	21	14065	FALSE
Chorioretinal scars	sense organs	363.3	0.372346	21	13782	FALSE
Personal history of allergy to medicinal agents	injuries & poisonings	977	0.373529	263	12696	FALSE
Acne	dermatologic	706.1	0.373556	253	14130	FALSE
Opiates and related narcotics causing adverse effects in therapeutic use	injuries & poisonings	965.1	0.3746	118	12551	FALSE
Proliferative glomerulonephritis	genitourinary	580.11	0.374704	22	11303	FALSE
Allergy/adverse effect of penicillin	injuries & poisonings	960.2	0.37602	183	12616	FALSE
Other abnormality of urination	genitourinary	599.9	0.376261	218	11794	FALSE
Acute upper respiratory infections of multiple or unspecified sites	respiratory	465	0.376388	2072	12691	FALSE
Pathological, developmental or recurrent dislocation	musculoskeletal	742.2	0.377038	23	12881	FALSE
Pneumonia	respiratory	480	0.377338	1186	13194	FALSE
Hypopotassemia	endocrine/metabolic	276.14	0.377545	1170	11493	FALSE
Acquired absence of breast	neoplasms	175	0.378012	110	13597	FALSE
Staphylococcus infections	infectious diseases	041.1	0.378689	379	13066	FALSE
Pancreatic cancer	neoplasms	157	0.378702	82	14158	FALSE
Bacteremia	infectious diseases	038.3	0.379772	447	13134	FALSE
Primary thrombocytopenia	hematopoietic	287.31	0.380065	55	12854	FALSE
Secondary hypothyroidism	endocrine/metabolic	244.1	0.381174	198	13510	FALSE
Cerebral atherosclerosis	circulatory system	433.12	0.381561	40	13478	FALSE
Hematemesis	digestive	578.1	0.38242	128	12548	FALSE
Joint/ligament sprain	injuries & poisonings	840.3	0.38254	115	13146	FALSE
Pituitary hyperfunction	endocrine/metabolic	253.1	0.382573	45	13352	FALSE
Rheumatoid arthritis	musculoskeletal	714.1	0.38275	273	13762	FALSE
Liver replaced by transplant	digestive	573.2	0.382871	51	12810	FALSE
Adverse effects of sedatives or other central nervous system depressants and anesthetics	injuries & poisonings	967	0.383486	33	12466	FALSE
Myopathy	neurological	359.2	0.384258	177	14186	FALSE
Bronchopneumonia and lung abscess	respiratory	480.5	0.384505	39	12047	FALSE
Hydrocele	genitourinary	603.1	0.384748	35	13802	FALSE
Obesity	endocrine/metabolic	278.1	0.385751	2159	12892	FALSE
Aplastic anemia	hematopoietic	284	0.386287	176	9391	FALSE
Other disorders of soft tissues	musculoskeletal	729	0.38633	512	12964	FALSE
Methicillin resistant Staphylococcus aureus	infectious diseases	041.12	0.386957	171	12858	FALSE
Displacement of intervertebral disc	musculoskeletal	722.1	0.388804	179	13193	FALSE
Chronic obstructive asthma with exacerbation	respiratory	495.11	0.389286	42	12074	FALSE
Anomalous atrioventricular excitation	circulatory system	426.4	0.390068	21	10856	FALSE
Acute periodontitis	digestive	523.31	0.391977	36	13660	FALSE
Encephalopathy, not elsewhere classified	neurological	348.8	0.392004	292	12627	FALSE
Atrioventricular block, complete	circulatory system	426.24	0.393994	69	10904	FALSE
Acute posthemorrhagic anemia	hematopoietic	285.1	0.394447	756	9971	FALSE
Rotator cuff (capsule) sprain	injuries & poisonings	840.2	0.397165	68	13099	FALSE
Acquired hypothyroidism	endocrine/metabolic	244.2	0.397511	89	13401	FALSE
Symptoms involving respiratory system and other chest symptoms	respiratory	519.9	0.39793	301	14127	FALSE
Psoriasis and related disorders	dermatologic	696	0.397989	86	13096	FALSE
Suicidal ideation or attempt	mental disorders	297	0.399403	250	10516	FALSE
Sexual and gender identity disorders	mental disorders	302	0.400639	48	10314	FALSE
Disorders of amino-acid metabolism	endocrine/metabolic	270.2	0.402961	20	14101	FALSE
Bronchiectasis	respiratory	496.3	0.405607	47	12079	FALSE
End stage renal disease	genitourinary	585.32	0.406011	853	12134	FALSE
Migrain with aura	neurological	340.1	0.406539	111	13348	FALSE
Ulceration of intestine	digestive	556.1	0.407662	22	11592	FALSE
Bursitis disorders	musculoskeletal	727.2	0.408976	32	12484	FALSE
Skull and face fracture and other intercranial injury	injuries & poisonings	819	0.409261	166	14718	FALSE
Complication of colostomy or enterostomy	injuries & poisonings	853	0.411662	29	13553	FALSE
Blood in stool	digestive	578.2	0.411778	418	12838	FALSE
Symptomatic artificial menopause	genitourinary	627.21	0.412391	39	12211	FALSE
Unspecified diffuse connective tissue disease	dermatologic	709.7	0.41246	52	13339	FALSE
Dermatophytosis of nail	infectious diseases	110.11	0.412671	422	12872	FALSE
Respiratory failure	respiratory	509.1	0.413048	805	12438	FALSE
Insulin pump user	endocrine/metabolic	250.3	0.41374	735	12379	FALSE
Other disorders of arteries and arterioles	circulatory system	447	0.413825	101	13652	FALSE
Paralytic strabismus	sense organs	378.5	0.415133	32	13524	FALSE
Other specified diseases of hair and hair follicles	dermatologic	704.8	0.415462	69	14208	FALSE
Secondary/extrinsic cardiomyopathies	circulatory system	425.2	0.416136	160	14165	FALSE
Aortic ectasia	circulatory system	447.7	0.416322	40	13591	FALSE
Depression	mental disorders	296.2	0.416341	1465	11731	FALSE
Cerebral edema and compression of brain	neurological	348.2	0.416693	194	12529	FALSE
Malignant neoplasm of liver, primary	neoplasms	155.1	0.417009	72	14148	FALSE
Infectious mononucleosis	infectious diseases	079.2	0.417017	28	11438	FALSE
Liver abscess and sequelae of chronic liver disease	digestive	571.8	0.417496	150	12909	FALSE
Pyogenic arthritis	musculoskeletal	711.1	0.418934	53	13156	FALSE
Hypertensive chronic kidney disease	circulatory system	401.22	0.420185	1142	9701	FALSE
Acute cystitis	genitourinary	592.11	0.421446	135	11573	FALSE
Gastritis and duodenitis, NOS	digestive	535.9	0.422502	78	13544	FALSE
Iron deficiency anemias	hematopoietic	280	0.423229	1003	10218	FALSE
Internal derangement of knee	injuries & poisonings	835	0.423588	152	14427	FALSE
Varicose veins of lower extremity	circulatory system	454.1	0.423769	55	12613	FALSE
Other specified cardiac dysrhythmias	circulatory system	427.3	0.424485	502	11337	FALSE
Urinary incontinence	genitourinary	599.4	0.424627	381	11957	FALSE
Protozoan infection	infectious diseases	131	0.424684	93	14263	FALSE
Disturbances in tooth eruption	digestive	520.2	0.424726	87	13711	FALSE
Symptoms involving female genital tract	genitourinary	624	0.42544	152	13771	FALSE
Congenital anomalies of genital organs	congenital anomalies	751.1	0.425856	101	14450	FALSE
Rheumatoid arthritis and other inflammatory polyarthropathies	musculoskeletal	714	0.426064	376	13865	FALSE
Systemic lupus erythematosus	dermatologic	695.42	0.426592	293	13502	FALSE
Secondary hyperparathyroidism (of renal origin)	genitourinary	588.2	0.427165	166	11447	FALSE
Arthropathy NOS	musculoskeletal	716.9	0.427591	272	13375	FALSE
Other aneurysm	circulatory system	442	0.427599	152	13703	FALSE
Cerebral ischemia	circulatory system	433.3	0.428809	405	13843	FALSE
Nonallopathic lesions NEC	symptoms	769	0.429032	22	15153	FALSE
Hypoparathyroidism	endocrine/metabolic	252.2	0.42951	21	13328	FALSE
Other symptoms involving abdomen and pelvis	digestive	579	0.429547	499	12919	FALSE
Postlaminectomy syndrome	musculoskeletal	722.8	0.429715	60	13074	FALSE
Bacterial pneumonia	respiratory	480.1	0.430826	232	12240	FALSE
Intestinal obstruction without mention of hernia	digestive	560	0.431063	347	11917	FALSE
Tachycardia NOS	circulatory system	427.7	0.43162	1008	11843	FALSE
Hemorrhage of fetus or newborn	pregnancy complications	656.4	0.432078	29	14644	FALSE
Retinal vascular changes and abnomalities	sense organs	362.4	0.432184	56	13691	FALSE
Infection/inflammation of internal prosthetic device; implant; and graft	infectious diseases	081	0.432416	240	14693	FALSE
Hereditary retinal dystrophies	sense organs	362.7	0.43246	20	13655	FALSE
Dental caries	digestive	521.1	0.432633	361	13985	FALSE
Cancer of urinary organs (incl. kidney and bladder)	neoplasms	189	0.432895	208	15077	FALSE
Diseases of hard tissues of teeth	digestive	521	0.433988	364	13988	FALSE
Premature menopause and other ovarian failure	genitourinary	627.5	0.434596	23	12195	FALSE
Cervicitis and endocervicitis	genitourinary	614.51	0.435026	79	13278	FALSE
Agorophobia, social phobia, and panic disorder	mental disorders	300.12	0.436585	90	10356	FALSE
Urinary obstruction	genitourinary	599.1	0.436616	45	11621	FALSE
Anterior pituitary disorders	endocrine/metabolic	253.4	0.436828	26	13333	FALSE
Complications of cardiac/vascular device, implant, and graft	injuries & poisonings	854	0.436887	214	13738	FALSE
Infestation (lice, mites)	infectious diseases	132	0.437693	30	14200	FALSE
Unequal leg length (acquired)	musculoskeletal	736.6	0.439017	21	13562	FALSE
Abdominal aortic aneurysm	circulatory system	442.11	0.439429	45	13596	FALSE
Acute laryngitis and tracheitis	respiratory	465.4	0.440582	33	10652	FALSE
Peritonitis and retroperitoneal infections	digestive	567	0.442275	162	13294	FALSE
Lack of normal physiological development, unspecified	endocrine/metabolic	264.9	0.442912	166	11441	FALSE
Other disorders of lipoid metabolism	endocrine/metabolic	277.5	0.443182	31	14431	FALSE
Abdominal hernia	digestive	550	0.444125	704	14461	FALSE
Other derangement of joint	musculoskeletal	742.9	0.445635	117	12975	FALSE
Spinal stenosis of lumbar region	musculoskeletal	720.1	0.447004	251	13265	FALSE
Mental disorders durring/after pregnancy	mental disorders	306.1	0.447856	88	10354	FALSE
Other diseases of blood and blood-forming organs	hematopoietic	289	0.448245	158	12169	FALSE
Muscular dystrophies and other myopathies	neurological	359	0.449246	184	14193	FALSE
Dermatophytosis	infectious diseases	110.1	0.449702	599	13049	FALSE
Effects radiation NOS	injuries & poisonings	990	0.450387	139	14077	FALSE
Ovarian dysfunction	endocrine/metabolic	256	0.45218	169	13476	FALSE
Obsessive-compulsive disorders	mental disorders	300.3	0.452424	29	10295	FALSE
Transient alteration of awareness	mental disorders	292.5	0.453183	64	12852	FALSE
Renal sclerosis, NOS	genitourinary	580.4	0.454279	45	11326	FALSE
Cardiac dysrhythmias	circulatory system	427	0.454927	2399	13234	FALSE
Other disorders of urethra and urinary tract	genitourinary	597	0.45719	141	14116	FALSE
Right bundle branch block	circulatory system	426.31	0.457815	39	10874	FALSE
Neoplasm of uncertain behavior	neoplasms	199	0.457995	326	13135	FALSE
Diaper or napkin rash	injuries & poisonings	949.1	0.458654	55	12394	FALSE
Major depressive disorder	mental disorders	296.22	0.45962	912	11178	FALSE
Disorders of sweat glands	dermatologic	705	0.459958	125	14002	FALSE
Disorders of iris and ciliary body	sense organs	379.5	0.460318	37	13529	FALSE
Disorders of refraction and accommodation; blindness and low vision	sense organs	367	0.462431	542	14503	FALSE
Infective connective tissue disorders	musculoskeletal	712	0.463468	39	13142	FALSE
Hyperparathyroidism	endocrine/metabolic	252.1	0.465164	169	13476	FALSE
Chronic osteomyelitis	musculoskeletal	710.12	0.465288	86	13189	FALSE
Personal history of diseases of blood and blood-forming organs	hematopoietic	289.3	0.466012	86	12097	FALSE
Erythematosquamous dermatosis	dermatologic	690	0.466259	102	13505	FALSE
Macular puckering of retina	sense organs	362.26	0.467622	43	13678	FALSE
Atopic/contact dermatitis due to other or unspecified	dermatologic	939	0.470403	721	13060	FALSE
Myocardial infarction	circulatory system	411.2	0.470544	496	13247	FALSE
Orthopnea	respiratory	513.32	0.471479	23	14046	FALSE
Sleep disorders	neurological	327	0.472305	839	13235	FALSE
Osteoarthritis; localized	musculoskeletal	740.1	0.473347	897	13686	FALSE
Disorders of the pituitary gland and its hypothalamic control	endocrine/metabolic	253	0.474629	121	13428	FALSE
Cystic mastopathy	genitourinary	610.1	0.475696	128	13814	FALSE
Peripheral angiopathy in diseases classified elsewhere	circulatory system	443.7	0.476164	60	13611	FALSE
Generalized anxiety disorder	mental disorders	300.11	0.476401	176	10442	FALSE
Intracranial hemorrhage (injury)	injuries & poisonings	818	0.476717	52	14604	FALSE
Sarcoidosis	dermatologic	697	0.477025	115	13518	FALSE
Viral hepatitis B	infectious diseases	070.2	0.47791	106	11516	FALSE
Eosinophilic esophagitis	digestive	530.15	0.478662	21	10934	FALSE
Superficial cellulitis and abscess	dermatologic	681	0.479243	983	13484	FALSE
Nephritis and nephropathy with pathological lesion	genitourinary	580.32	0.480118	90	11371	FALSE
Acute pancreatitis	digestive	577.1	0.480522	142	14865	FALSE
Osteoarthrosis, localized, primary	musculoskeletal	740.11	0.481457	815	13604	FALSE
Fracture of ribs	injuries & poisonings	807	0.484011	101	13025	FALSE
Retinal detachments and defects	sense organs	361	0.484532	85	13846	FALSE
Diabetes type 2 with peripheral circulatory disorders	endocrine/metabolic	250.25	0.484836	134	11778	FALSE
Primary angle-closure glaucoma	sense organs	365.2	0.4852	63	13824	FALSE
Aphasia	mental disorders	292.11	0.486572	84	12872	FALSE
Mixed hyperlipidemia	endocrine/metabolic	272.13	0.486745	1598	13079	FALSE
Encounter for long-term (current) use of antibiotics	infectious diseases	980	0.486747	313	14795	FALSE
Abnormal findings on examination of urine	genitourinary	598	0.488379	171	15060	FALSE
Erythematous conditions	dermatologic	695	0.488699	456	13859	FALSE
Hematuria	genitourinary	593	0.488708	507	11945	FALSE
Adjustment reaction	mental disorders	304	0.488908	456	10722	FALSE
Jaundice (not of newborn)	digestive	573.5	0.48898	137	12896	FALSE
Kyphosis (acquired)	musculoskeletal	737.1	0.49021	27	13568	FALSE
Derangement of joint, non-traumatic	musculoskeletal	742	0.491276	144	13002	FALSE
Gonococcal infections	infectious diseases	090.2	0.493577	58	14687	FALSE
Cellulitis and abscess of leg, except foot	dermatologic	681.5	0.49428	282	12783	FALSE
Hallucinations	mental disorders	292.6	0.4964	55	12843	FALSE
Osteoarthrosis involving more than one site, but not specified as generalized	musculoskeletal	740.3	0.498118	33	12822	FALSE
Somatoform disorder	mental disorders	303.4	0.498784	52	10318	FALSE
Other specified gastritis	digestive	535.8	0.500803	85	13551	FALSE
Seborrheic dermatitis	dermatologic	690.1	0.501207	101	13504	FALSE
Atherosclerosis of native arteries of the extremities with intermittent claudication	circulatory system	440.22	0.501321	70	13621	FALSE
Rhabdomyolysis	symptoms	772.4	0.501831	80	13440	FALSE
Coronary atherosclerosis	circulatory system	411.4	0.503799	1002	13753	FALSE
Benign neoplasm of adrenal gland	neoplasms	227.1	0.504845	37	14831	FALSE
Symptoms and disorders of the joints	musculoskeletal	741	0.504865	855	13713	FALSE
Late effects of cerebrovascular disease	circulatory system	433.8	0.505257	234	13672	FALSE
Hyperpotassemia	endocrine/metabolic	276.13	0.505434	841	11164	FALSE
Polyneuropathy in diabetes	endocrine/metabolic	250.6	0.506886	422	12066	FALSE
Spinal stenosis	musculoskeletal	720	0.508477	363	13377	FALSE
Angina pectoris	circulatory system	411.3	0.508613	248	12999	FALSE
Other cardiac conduction disorders	circulatory system	426.8	0.508672	31	10866	FALSE
Aphasia/speech disturbance	mental disorders	292.1	0.509569	242	13030	FALSE
Diseases due to other mycobacteria	infectious diseases	031	0.51015	21	12708	FALSE
Fracture of ankle and foot	injuries & poisonings	801	0.511373	273	13197	FALSE
Acquired spondylolisthesis	musculoskeletal	738.4	0.511444	116	13657	FALSE
Candidiasis	infectious diseases	112	0.511726	598	13048	FALSE
Other retinal disorders	sense organs	362	0.512913	414	14049	FALSE
Iatrogenic hypotension	circulatory system	458.2	0.513305	37	13245	FALSE
Fracture of neck of femur	injuries & poisonings	800.1	0.513474	78	13002	FALSE
Neurological disorders	mental disorders	292	0.513508	1117	13905	FALSE
Mental retardation	mental disorders	315.3	0.513534	120	14045	FALSE
Dysphagia	digestive	532	0.514589	814	11727	FALSE
Aneurysm of other specified artery	circulatory system	442.8	0.516061	25	13576	FALSE
Mood disorders	mental disorders	296	0.516691	1807	12073	FALSE
Irregular menstrual cycle	genitourinary	626.13	0.517703	315	12487	FALSE
Disorders of diaphragm	respiratory	513.8	0.518197	42	14065	FALSE
Perinatal jaundice	pregnancy complications	656.8	0.518204	99	14714	FALSE
Other specified erythematous conditions	dermatologic	695.8	0.518318	51	13454	FALSE
Arrhythmia (cardiac) NOS	circulatory system	427.5	0.52031	620	11455	FALSE
Heart failure with preserved EF [Diastolic heart failure]	circulatory system	428.4	0.521088	404	13410	FALSE
Atherosclerosis of the extremities	circulatory system	440.2	0.522794	160	13711	FALSE
Inflammatory diseases of prostate	genitourinary	601	0.524981	95	14281	FALSE
Cancer of liver and intrahepatic bile duct	neoplasms	155	0.52513	82	14158	FALSE
Renal dialysis	genitourinary	585.31	0.527797	504	11785	FALSE
Cardiomyopathy	circulatory system	425	0.528756	509	14514	FALSE
Hemorrhage or hematoma complicating a procedure	injuries & poisonings	850	0.530832	187	13711	FALSE
Other persistent mental disorders due to conditions classified elsewhere	mental disorders	290.3	0.531263	114	12902	FALSE
Pelvic peritoneal adhesions, female (postoperative) (postinfection)	genitourinary	614.1	0.532664	105	13304	FALSE
Other deficiency anemia	hematopoietic	281	0.533179	171	9386	FALSE
Senile osteoporosis	musculoskeletal	743.12	0.533326	46	13821	FALSE
Other conditions or status of the mother complicating pregnancy, childbirth, or the puerperium	pregnancy complications	649	0.534014	694	14411	FALSE
Hallux valgus (Bunion)	musculoskeletal	735.3	0.534244	96	13637	FALSE
Non-healing surgical wound	injuries & poisonings	875	0.535515	23	13439	FALSE
Joint effusions	musculoskeletal	741.4	0.536824	302	13160	FALSE
Poisoning by hormones and synthetic substitutes	injuries & poisonings	962	0.537303	39	12472	FALSE
Rupture of tendon, nontraumatic	musculoskeletal	727.6	0.538293	83	12535	FALSE
Poisoning by agents primarily affecting blood constituents	injuries & poisonings	964	0.538465	26	12459	FALSE
Anticoagulants causing adverse effects	injuries & poisonings	964.1	0.538465	26	12459	FALSE
Ulceration of the lower GI tract	digestive	556	0.539274	40	11610	FALSE
Adrenal cortical steroids causing adverse effects in therapeutic use	injuries & poisonings	962.1	0.539402	26	12459	FALSE
Heart valve disorders	circulatory system	395	0.539739	678	13677	FALSE
Abnormal glucose	endocrine/metabolic	250.4	0.539898	493	12137	FALSE
Other specified disorders of breast	genitourinary	613.8	0.542451	61	14462	FALSE
Hydrocephalus	neurological	331.1	0.542781	126	12461	FALSE
Certain early complications of trauma or procedure	injuries & poisonings	958	0.544375	92	15054	FALSE
Other and unspecified disorders of the nervous system	neurological	349	0.545483	59	12394	FALSE
Abnormal movement	neurological	350	0.545904	818	14483	FALSE
Cervicalgia	symptoms	761	0.546193	821	14331	FALSE
Cardiac shunt/ heart septal defect	congenital anomalies	747.11	0.54744	217	14721	FALSE
Meningitis	neurological	320	0.549143	67	14950	FALSE
Genitourinary congenital anomalies	congenital anomalies	751	0.549603	237	14586	FALSE
Other unspecified back disorders	musculoskeletal	724.9	0.550014	20	13034	FALSE
Other congenital musculoskeletal anomalies	congenital anomalies	756	0.552856	57	14811	FALSE
Septal Deviations/Turbinate Hypertrophy	respiratory	470	0.554115	244	11103	FALSE
Other and unspecified disc disorder	musculoskeletal	722.9	0.554156	30	13044	FALSE
Nervous system congenital anomalies	congenital anomalies	752	0.554172	118	14955	FALSE
Acute pharyngitis	respiratory	465.2	0.554173	880	11499	FALSE
Congestive heart failure (CHF) NOS	circulatory system	428.1	0.555739	956	13962	FALSE
Inflammatory bowel disease and other gastroenteritis and colitis	digestive	555	0.555906	255	11825	FALSE
Chronic Kidney Disease, Stage III	genitourinary	585.33	0.556483	695	11976	FALSE
Psychophysical visual disturbances	sense organs	368.91	0.556792	22	14092	FALSE
Eustachian tube disorders	sense organs	381.2	0.557091	226	13518	FALSE
Alkalosis	endocrine/metabolic	276.42	0.557697	68	10391	FALSE
Dermatophytosis / Dermatomycosis	infectious diseases	110	0.557854	628	13078	FALSE
Hyperlipidemia	endocrine/metabolic	272.1	0.557899	2702	14183	FALSE
Other disorders of bone and cartilage	musculoskeletal	733	0.559381	166	13003	FALSE
Contracture of joint	musculoskeletal	739	0.559553	110	13651	FALSE
Other abnormal blood chemistry	symptoms	790.6	0.560325	195	14790	FALSE
Asthma	respiratory	495	0.56034	1448	13480	FALSE
Nonspecific chest pain	circulatory system	418	0.56074	2785	13090	FALSE
Gingival and periodontal diseases	digestive	523	0.562641	140	13764	FALSE
Transient cerebral ischemia	circulatory system	433.31	0.563192	380	13818	FALSE
Cyst or abscess of Bartholin's gland	genitourinary	614.53	0.564317	21	13220	FALSE
Inflammatory disease of breast	genitourinary	613.1	0.566864	46	14447	FALSE
Herpes zoster	infectious diseases	053	0.567177	98	11508	FALSE
Encounter for long-term (current) use of antiplatelets/antithrombotics	circulatory system	457.2	0.567993	68	12626	FALSE
Intestinal malabsorption (non-celiac)	digestive	557	0.568277	73	11643	FALSE
Coagulation defects complicating pregnancy or postpartum	hematopoietic	286.3	0.568971	28	12827	FALSE
Peritoneal adhesions (postoperative) (postinfection)	digestive	568.1	0.570922	122	13254	FALSE
Other headache syndromes	neurological	339	0.570961	589	13826	FALSE
Open wound of lip and mouth	injuries & poisonings	870.5	0.571748	27	13443	FALSE
Bacterial infection NOS	infectious diseases	041	0.571959	1154	13841	FALSE
Disorders of lipoid metabolism	endocrine/metabolic	272	0.574509	2705	14186	FALSE
Acidosis	endocrine/metabolic	276.41	0.574718	819	11142	FALSE
Gout	endocrine/metabolic	274.1	0.576728	484	14905	FALSE
Disorders of vitreous body	sense organs	379.2	0.579111	236	13728	FALSE
Respiratory complications	respiratory	519.2	0.58156	24	13850	FALSE
Noninflammatory disorders of cervix	genitourinary	619.3	0.581776	37	13690	FALSE
Failure to thrive (childhood)	endocrine/metabolic	264.2	0.582362	212	11487	FALSE
Hypertensive heart disease	circulatory system	401.21	0.582371	727	9286	FALSE
Vitamin A deficiency	endocrine/metabolic	261.1	0.582765	23	11298	FALSE
Cyst of kidney, acquired	genitourinary	586.2	0.583023	193	11474	FALSE
Cholangitis	digestive	575.1	0.583262	41	14151	FALSE
Phlebitis and thrombophlebitis of lower extremities	circulatory system	451.2	0.584036	37	12595	FALSE
Chronic ulcer of leg or foot	dermatologic	707.2	0.58433	179	14758	FALSE
Other and unspecified complications of birth; puerperium affecting management of mother	pregnancy complications	654	0.58448	83	14399	FALSE
Encounter for long-term (current) use of anticoagulants	hematopoietic	286.2	0.584486	642	13441	FALSE
Abnormal electrocardiogram [ECG] [EKG]	circulatory system	426.7	0.584944	56	10891	FALSE
Fracture of foot	injuries & poisonings	801.1	0.585032	142	13066	FALSE
Insomnia	neurological	327.4	0.585811	468	12864	FALSE
Polyneuropathy due to drugs	mental disorders	316.1	0.586996	52	12136	FALSE
Hereditary hemolytic anemias	hematopoietic	282	0.590099	539	9754	FALSE
Type 1 diabetes with neurological manifestations	endocrine/metabolic	250.14	0.590155	100	11744	FALSE
Myopia	sense organs	367.1	0.590848	328	14289	FALSE
Open-angle glaucoma	sense organs	365.1	0.59113	354	14115	FALSE
Hepatitis NOS	infectious diseases	070.9	0.592789	92	11502	FALSE
Nephritis and nephropathy without mention of glomerulonephritis	genitourinary	580.3	0.593206	239	11520	FALSE
Other disorders of bladder	genitourinary	596	0.594178	309	14284	FALSE
Early or threatened labor; hemorrhage in early pregnancy	pregnancy complications	636	0.595016	691	14309	FALSE
Chronic renal failure [CKD]	genitourinary	585.3	0.596343	1670	12951	FALSE
Abscess or ulceration of vulva	genitourinary	614.54	0.596708	40	13239	FALSE
Congenital anomalies of intestine	congenital anomalies	750.21	0.596837	42	14391	FALSE
Other pulmonary inflamation or edema	respiratory	505	0.598638	98	11731	FALSE
Decreased libido	mental disorders	302.1	0.59883	22	10288	FALSE
Hidradenitis	dermatologic	705.3	0.599019	80	13957	FALSE
Vascular dementia	mental disorders	290.16	0.599166	35	12823	FALSE
Infantile cerebral palsy	neurological	343	0.601202	126	12461	FALSE
Sleep apnea	neurological	327.3	0.601224	1137	13533	FALSE
Pyelonephritis	genitourinary	590	0.603211	238	11676	FALSE
Cancer of mouth	neoplasms	145	0.603217	71	14985	FALSE
Hypersomnia	neurological	327.1	0.60331	56	12452	FALSE
Acid-base balance disorder	endocrine/metabolic	276.4	0.603455	860	11183	FALSE
Decubitus ulcer	dermatologic	707.1	0.604507	160	14739	FALSE
Electrolyte imbalance	endocrine/metabolic	276.1	0.607642	2120	12443	FALSE
Cellulitis and abscess of oral soft tissues	digestive	528.3	0.608047	34	14446	FALSE
Disorders of calcium/phosphorus metabolism	endocrine/metabolic	275.5	0.608421	325	14146	FALSE
Anaphylactic shock NOS	injuries & poisonings	946	0.609363	74	12413	FALSE
Type 2 diabetes with renal manifestations	endocrine/metabolic	250.22	0.61084	545	12189	FALSE
Obstructive genitourinary defect	congenital anomalies	751.3	0.610947	35	14384	FALSE
Other hemoglobinopathies	hematopoietic	282.8	0.611018	67	9282	FALSE
Cardiac and circulatory congenital anomalies	congenital anomalies	747	0.611188	413	14917	FALSE
Sacroiliitis NEC	musculoskeletal	715.1	0.611438	97	13586	FALSE
Other acute and subacute forms of ischemic heart disease	circulatory system	411.9	0.612409	22	12773	FALSE
Parkinson's disease	neurological	332	0.612413	31	12366	FALSE
Althete's foot	infectious diseases	110.12	0.612963	74	12524	FALSE
Substance addiction and disorders	mental disorders	316	0.613201	641	12725	FALSE
Anal and rectal conditions	digestive	565	0.615573	287	13419	FALSE
Diaphragmatic hernia	digestive	550.2	0.616065	272	14029	FALSE
Secondary malignant neoplasm	neoplasms	198	0.616871	638	13447	FALSE
Nerve root lesions	neurological	353.2	0.617279	22	13732	FALSE
Hepatomegaly	digestive	573.3	0.618171	59	12818	FALSE
Stiffness of joint	musculoskeletal	741.2	0.618657	272	13130	FALSE
Nephritis and nephropathy in diseases classified elsewhere	genitourinary	580.31	0.618726	160	11441	FALSE
Other inflammatory disorders of male genital organs	genitourinary	601.8	0.618999	26	14212	FALSE
Extrapyramidal disease and abnormal movement disorders	neurological	333	0.619476	145	12480	FALSE
Chemotherapy	neoplasms	197	0.61949	981	13790	FALSE
Endometrial hyperplasia	genitourinary	621	0.620425	21	14783	FALSE
Other disorders of synovium, tendon, and bursa	musculoskeletal	727	0.621047	551	13003	FALSE
Cancer of larynx	neoplasms	149.4	0.621655	46	14960	FALSE
Pain, swelling or discharge of eye	sense organs	379.9	0.62195	62	13554	FALSE
Atherosclerosis	circulatory system	440	0.622593	243	13794	FALSE
Other diseases of lung	respiratory	510	0.622903	734	14193	FALSE
Urethritis and urethral syndrome	genitourinary	592.2	0.623278	20	11458	FALSE
Atherosclerosis of aorta	circulatory system	440.9	0.623436	52	13603	FALSE
Malignant neoplasm of other and ill-defined sites within the digestive organs and peritoneum	neoplasms	159	0.623802	101	14177	FALSE
Venous/cerebrovascular complications embolism in pregnancy and the puerperium	pregnancy complications	671	0.624101	28	14974	FALSE
Leukemia	neoplasms	204	0.625213	113	14933	FALSE
Hemangioma and lymphangioma, any site	neoplasms	228	0.626997	35	15081	FALSE
Myoneural disorders	neurological	358	0.627123	34	14043	FALSE
Cervical cancer	neoplasms	180.1	0.630842	30	13133	FALSE
Aseptic necrosis of bone	musculoskeletal	733.4	0.63092	112	12949	FALSE
Alopecia	dermatologic	704.1	0.631217	156	14295	FALSE
stress incontinence, female	genitourinary	624.9	0.631315	86	13705	FALSE
Cardiac pacemaker/device in situ	circulatory system	426.9	0.631358	304	11139	FALSE
Emphysema	respiratory	496.1	0.632213	138	12170	FALSE
Other symptoms/disorders or the urinary system	genitourinary	599	0.632954	1460	13036	FALSE
Other and nonspecific abnormal cytological, histological and immunological findings	symptoms	795	0.633195	24	15134	FALSE
Overweight, obesity and other hyperalimentation	endocrine/metabolic	278	0.633423	2403	13136	FALSE
Second degree AV block	circulatory system	426.23	0.636736	39	10874	FALSE
Microscopic hematuria	genitourinary	593.2	0.636919	72	11510	FALSE
Pulmonary collapse; interstitial and compensatory emphysema	respiratory	508	0.638027	1551	13184	FALSE
Cancer of other female genital organs	neoplasms	184	0.638738	70	14114	FALSE
Precocious sexual development and puberty NEC	endocrine/metabolic	259.4	0.638826	68	13375	FALSE
Other acquired musculoskeletal deformity	musculoskeletal	738	0.639754	152	13693	FALSE
Migraine	neurological	340	0.642041	551	13788	FALSE
Other paralytic syndromes	neurological	344	0.644833	126	12461	FALSE
Skin cancer	neoplasms	172	0.645141	65	14719	FALSE
Hemorrhage of gastrointestinal tract	digestive	578.9	0.64627	268	12688	FALSE
Other specified congenital anomalies of nervous system	congenital anomalies	752.2	0.646285	93	14930	FALSE
Nonspecific abnormal findings on radiological and other examination of skull and head	neurological	346.1	0.648506	20	12355	FALSE
Primary hypercoagulable state	hematopoietic	286.81	0.648801	60	12859	FALSE
Viral pneumonia	respiratory	480.2	0.649775	29	12037	FALSE
Bipolar	mental disorders	296.1	0.65158	381	10647	FALSE
Herpes simplex	infectious diseases	054	0.652614	216	11626	FALSE
Chronic ulcer of unspecified site	dermatologic	707.3	0.652711	63	14642	FALSE
Abnormal sputum	respiratory	516	0.653164	131	14993	FALSE
Splenomegaly	digestive	579.2	0.653291	77	12497	FALSE
Fracture of tibia and fibula	injuries & poisonings	800.3	0.653377	146	13070	FALSE
Cirrhosis of liver without mention of alcohol	digestive	571.51	0.653815	225	12984	FALSE
Periodontitis (acute or chronic)	digestive	523.3	0.65403	46	13670	FALSE
Iron deficiency anemia secondary to blood loss (chronic)	hematopoietic	280.2	0.655413	273	9488	FALSE
Oliguria and anuria	genitourinary	599.6	0.65731	61	11637	FALSE
Elevated prostate specific antigen [PSA]	genitourinary	796	0.659788	80	14266	FALSE
Lack of coordination	neurological	350.3	0.660256	227	13892	FALSE
Asthma with exacerbation	respiratory	495.2	0.660436	518	12550	FALSE
Disorders of esophageal motility	digestive	530.5	0.661102	41	10954	FALSE
Disorders of adrenal glands	endocrine/metabolic	255	0.662056	223	13530	FALSE
Abnormal weight gain	endocrine/metabolic	278.4	0.662455	467	11200	FALSE
Deficiency anemias	hematopoietic	281.9	0.663991	36	9251	FALSE
Cardiac pacemaker in situ	circulatory system	426.91	0.666715	141	10976	FALSE
Disorders of lacrimal system	sense organs	375	0.668317	28	13520	FALSE
Swelling, mass, or lump in head and neck [Space-occupying lesion, intracranial NOS]	mental disorders	293.1	0.669715	308	14395	FALSE
Peritoneal or intestinal adhesions	digestive	560.3	0.670026	37	11607	FALSE
Dysmenorrhea	genitourinary	626.2	0.670707	210	12382	FALSE
Learning disorder	mental disorders	315.1	0.673108	31	13956	FALSE
Obstructive chronic bronchitis	respiratory	496.21	0.673252	145	12177	FALSE
Enthesopathy	musculoskeletal	726.1	0.673771	427	12879	FALSE
Malignant neoplasm of head, face, and neck	neoplasms	195.3	0.674931	94	12903	FALSE
Benign neoplasm of breast	genitourinary	610.4	0.67708	53	13739	FALSE
Functional digestive disorders	digestive	564	0.677851	348	11918	FALSE
Colorectal cancer	neoplasms	153	0.678597	266	13881	FALSE
Abnormal findings examination of lungs	respiratory	514	0.678999	469	14468	FALSE
Dysmetabolic syndrome X	endocrine/metabolic	277.7	0.679415	78	14478	FALSE
Varicose veins of lower extremity, symptomtic	circulatory system	454.11	0.679627	42	12600	FALSE
Diseases of hair and hair follicles	dermatologic	704	0.67994	247	14386	FALSE
Chronic sinusitis	respiratory	475	0.68004	387	11246	FALSE
Corns and callosities	dermatologic	700	0.681807	84	13947	FALSE
Primary/intrinsic cardiomyopathies	circulatory system	425.1	0.682394	466	14471	FALSE
Fluid overload	endocrine/metabolic	276.6	0.684257	563	10886	FALSE
Other disorders of biliary tract	digestive	575.8	0.68442	107	14217	FALSE
Optic neuritis/neuropathy	sense organs	377.3	0.684667	38	13530	FALSE
Cellulitis and abscess of fingers/toes	dermatologic	681.1	0.684977	146	12647	FALSE
Aphakia and other disorders of lens	sense organs	379.3	0.68522	24	13516	FALSE
Polycystic ovaries	endocrine/metabolic	256.4	0.687219	161	13468	FALSE
Chronic Kidney Disease, Stage IV	genitourinary	585.34	0.687584	371	11652	FALSE
Respiratory abnormalities	respiratory	513	0.688727	364	14387	FALSE
Encounter for long-term (current) use of aspirin	circulatory system	457.3	0.688891	248	12806	FALSE
Noninflammatory disorders of ovary, fallopian tube, and broad ligament	genitourinary	619.1	0.689927	86	13739	FALSE
Glucocorticoid deficiency	endocrine/metabolic	255.21	0.690067	106	13413	FALSE
Pleurisy; pleural effusion	respiratory	507	0.690491	963	12596	FALSE
Benign mammary dysplasias	genitourinary	610	0.691493	170	13856	FALSE
Congenital musculoskeletal deformities of spine	congenital anomalies	754	0.692124	27	14781	FALSE
Impulse control disorder	mental disorders	312.3	0.692889	36	13961	FALSE
Other diseases of respiratory system, not elsewhere classified	respiratory	519	0.694364	378	14204	FALSE
Cardiac conduction disorders	circulatory system	426	0.695295	561	11396	FALSE
Digestive congenital anomalies	congenital anomalies	750	0.69558	88	14437	FALSE
Personal history of diseases of digestive system	digestive	564.9	0.695659	21	11591	FALSE
Other local infections of skin and subcutaneous tissue	dermatologic	686	0.696742	243	12744	FALSE
Bone marrow or stem cell transplant	neoplasms	860	0.697286	33	15136	FALSE
Ventricular fibrillation and flutter	circulatory system	427.41	0.697483	45	10880	FALSE
Chromosomal anomalies	congenital anomalies	758.1	0.69798	47	14414	FALSE
Irritable Bowel Syndrome	digestive	564.1	0.699275	170	11740	FALSE
Cancer of prostate	neoplasms	185	0.700559	307	14493	FALSE
Thoracic or lumbosacral neuritis or radiculitis, unspecified	symptoms	763	0.702461	350	14184	FALSE
Progressive myopia	sense organs	360.2	0.702666	21	13782	FALSE
Other intestinal obstruction	digestive	560.4	0.702976	194	11764	FALSE
Esophagitis, GERD and related diseases	digestive	530.1	0.704467	2093	13006	FALSE
Spasm of muscle	symptoms	772.2	0.706383	301	13661	FALSE
Abnormal tumor markers	symptoms	795.8	0.706485	21	15131	FALSE
Fracture of clavicle or scapula	injuries & poisonings	803.3	0.707095	41	12965	FALSE
Cholelithiasis	digestive	574.1	0.707149	322	14432	FALSE
Other and unspecified congenital anomalies	congenital anomalies	759	0.709135	276	14643	FALSE
Cardiac defibrillator in situ	circulatory system	426.92	0.709605	209	11044	FALSE
Aortic aneurysm	circulatory system	442.1	0.711806	98	13649	FALSE
Loss of teeth or edentulism	digestive	525.1	0.712735	39	13663	FALSE
Thyroiditis	endocrine/metabolic	245	0.712899	83	13395	FALSE
Elevated white blood cell count	hematopoietic	288.2	0.713365	724	12735	FALSE
Abnormal involuntary movements	neurological	350.1	0.713753	278	13943	FALSE
Traumatic arthropathy	injuries & poisonings	836	0.714544	26	14301	FALSE
Other complications of the puerperium NEC	pregnancy complications	674	0.715227	35	14981	FALSE
Other complications of pregnancy NEC	pregnancy complications	646	0.715754	278	14747	FALSE
Symptoms involving nervous and musculoskeletal systems	symptoms	781	0.716315	118	14701	FALSE
Subdural hemorrhage (injury)	injuries & poisonings	818.1	0.716845	28	14580	FALSE
Cancer of other lymphoid, histiocytic tissue	neoplasms	202	0.717349	45	14865	FALSE
Congestive heart failure; nonhypertensive	circulatory system	428	0.718042	1178	14184	FALSE
Stricture/obstruction of ureter	genitourinary	586.4	0.719532	106	11387	FALSE
Malignant neoplasm of gallbladder and extrahepatic bile ducts	neoplasms	159.3	0.719616	24	14100	FALSE
Secondary malignant neoplasm of digestive systems	neoplasms	198.3	0.719767	104	12913	FALSE
Respiratory insufficiency	respiratory	509.2	0.720278	266	11899	FALSE
Nonrheumatic aortic valve disorders	circulatory system	395.2	0.720818	244	13243	FALSE
Degenerative skin conditions and other dermatoses	dermatologic	702	0.721644	86	13792	FALSE
Sexually transmitted infections (not HIV or hepatitis)	infectious diseases	090	0.722433	249	14878	FALSE
Cellulitis and abscess of arm/hand	dermatologic	681.3	0.724563	156	12657	FALSE
Other nonmalignant breast conditions	genitourinary	613	0.724563	293	14694	FALSE
Acute pericarditis	circulatory system	420.21	0.724603	32	14037	FALSE
Urethral stricture (not specified as infectious)	genitourinary	597.1	0.725007	62	14037	FALSE
GERD	digestive	530.11	0.725031	2003	12916	FALSE
Abnormal mammogram	genitourinary	611.1	0.726222	198	13884	FALSE
Infection with drug-resistant microorganisms	infectious diseases	041.9	0.72742	112	12799	FALSE
Hyposmolality and/or hyponatremia	endocrine/metabolic	276.12	0.728829	554	10877	FALSE
Secondary malignancy of respiratory organs	neoplasms	198.2	0.729242	194	13003	FALSE
Pallor and flushing	symptoms	782.6	0.729392	21	12901	FALSE
Acquired foot deformities	musculoskeletal	735	0.72984	382	13923	FALSE
Anxiety disorders	mental disorders	300	0.730073	1327	11593	FALSE
Methicillin sensitive Staphylococcus aureus	infectious diseases	041.11	0.73259	165	12852	FALSE
Trigeminal nerve disorders [CN5]	neurological	352.1	0.732843	55	13765	FALSE
Disorders of iron metabolism	hematopoietic	275.1	0.734715	64	13885	FALSE
Diseases of white blood cells	hematopoietic	288	0.735141	838	12849	FALSE
Contusion	injuries & poisonings	916	0.735199	239	13924	FALSE
Perforation of tympanic membrane	sense organs	384.4	0.736247	29	13321	FALSE
Nonrheumatic pulmonary valve disorders	circulatory system	395.4	0.736921	46	13045	FALSE
Torsion dystonia	neurological	333.4	0.739314	49	12384	FALSE
Ventral hernia	digestive	550.5	0.739397	100	13857	FALSE
Gout and other crystal arthropathies	endocrine/metabolic	274	0.740516	496	14917	FALSE
Functional disorders of bladder	genitourinary	596.5	0.740585	221	14196	FALSE
Deep vein thrombosis [DVT]	circulatory system	452.2	0.742362	336	12894	FALSE
Fracture of pelvis	injuries & poisonings	802	0.742835	78	13002	FALSE
Atrioventricular [AV] block	circulatory system	426.2	0.743729	126	10961	FALSE
Organic or persistent insomnia	neurological	327.41	0.744404	70	12466	FALSE
Occlusion of cerebral arteries, with cerebral infarction	circulatory system	433.11	0.746398	42	13480	FALSE
Abdominal pain	symptoms	785	0.747252	3302	12625	FALSE
Degeneration of macula and posterior pole of retina	sense organs	362.2	0.750248	137	13772	FALSE
Fracture of lower limb	injuries & poisonings	800	0.750699	368	13292	FALSE
Hemoptysis	respiratory	516.1	0.750812	128	14990	FALSE
Secondary thrombocytopenia	hematopoietic	287.32	0.751672	66	12865	FALSE
Spondylosis and allied disorders	musculoskeletal	721	0.753615	486	13500	FALSE
Ulcer of esophagus	digestive	530.12	0.75411	27	10940	FALSE
Other perinatal conditions of fetus or newborn	pregnancy complications	656	0.754654	287	14902	FALSE
Cellulitis and abscess of face/neck	dermatologic	681.2	0.75773	128	12629	FALSE
Facial weakness	symptoms	772.6	0.758104	42	13402	FALSE
Synoviopathy	musculoskeletal	726.2	0.758575	26	12478	FALSE
Acquired acanthosis nigricans	dermatologic	701.6	0.759097	123	13986	FALSE
Other forms of chronic heart disease	circulatory system	414	0.759407	389	13140	FALSE
Lipoma	neoplasms	214	0.759969	69	14938	FALSE
Schizophrenia and other psychotic disorders	mental disorders	295	0.760601	296	10562	FALSE
Ileostomy status	digestive	559	0.760658	40	11610	FALSE
Visual field defects	sense organs	368.4	0.760909	41	14111	FALSE
Chorioretinal inflammations, scars, and other disorders of choroid	sense organs	363	0.761724	37	13798	FALSE
Alopecia Areata	dermatologic	704.11	0.762929	22	14161	FALSE
Other conditions of brain, NOS	neurological	348.9	0.763024	264	12599	FALSE
Complication due to other implant and internal device	injuries & poisonings	859	0.763544	124	13648	FALSE
Secondary malignancy of brain/spine	neoplasms	198.5	0.763851	87	12896	FALSE
Other immunological findings	endocrine/metabolic	279.7	0.766028	109	14240	FALSE
Atrial fibrillation	circulatory system	427.21	0.767059	566	11401	FALSE
Encounter for long-term (current) use of anticoagulants, antithrombotics, aspirin	circulatory system	457	0.767591	289	12847	FALSE
Throat pain	respiratory	478	0.767915	83	10942	FALSE
Breast cancer	neoplasms	174	0.768725	296	14141	FALSE
Disturbance of skin sensation	dermatologic	687.4	0.769967	567	12757	FALSE
Pulmonary congestion and hypostasis	respiratory	503	0.770941	383	12016	FALSE
Neoplasm of unspecified nature of digestive system	neoplasms	158	0.771483	43	14119	FALSE
Wheezing	respiratory	512.1	0.771903	348	9055	FALSE
Optic atrophy	sense organs	377.1	0.773806	40	13532	FALSE
Lack of normal physiological development	endocrine/metabolic	264	0.77476	400	11675	FALSE
Other inflammatory spondylopathies	musculoskeletal	715	0.775425	121	13610	FALSE
Strabismus (not specified as paralytic)	sense organs	378.1	0.775715	89	13581	FALSE
Malunion and nonunion of fracture	musculoskeletal	733.8	0.777848	84	12921	FALSE
Hypovolemia	endocrine/metabolic	276.5	0.778115	1390	11713	FALSE
Osteoarthrosis, localized, secondary	musculoskeletal	740.12	0.778818	28	12817	FALSE
Atrial fibrillation and flutter	circulatory system	427.2	0.780676	586	11421	FALSE
Other acquired deformities of limbs	musculoskeletal	736	0.782562	80	13621	FALSE
Lower gastrointestinal congenital anomalies	congenital anomalies	750.2	0.78305	63	14412	FALSE
Umbilical hernia	digestive	550.4	0.787472	176	13933	FALSE
Abnormality in fetal heart rate or rhythm	pregnancy complications	655.1	0.788165	557	14245	FALSE
Open wound of finger(s)	injuries & poisonings	871.2	0.788322	42	13458	FALSE
Viral hepatitis C	infectious diseases	070.3	0.788489	347	11757	FALSE
Malignant neoplasm of ovary	neoplasms	184.11	0.789068	38	14082	FALSE
Pathologic fracture of vertebrae	musculoskeletal	743.21	0.79063	21	13796	FALSE
Hypertension complicating pregnancy, childbirth, and the puerperium	pregnancy complications	642	0.791261	360	14957	FALSE
HIV infection, symptomatic	infectious diseases	071.1	0.792197	713	12123	FALSE
Colon cancer	neoplasms	153.2	0.792713	147	13762	FALSE
Chronic bronchitis	respiratory	496.2	0.792942	161	12193	FALSE
Human immunodeficiency virus [HIV] disease	infectious diseases	071	0.793282	719	12129	FALSE
Myeloid leukemia, acute	neoplasms	204.21	0.793836	63	14883	FALSE
Cholelithiasis and cholecystitis	digestive	574	0.795211	379	14489	FALSE
Dysthymic disorder	mental disorders	300.4	0.795269	129	10395	FALSE
Arterial embolism and thrombosis	circulatory system	444	0.79663	60	13611	FALSE
Vitamin deficiency	endocrine/metabolic	261	0.796912	1590	12865	FALSE
Conductive hearing loss	sense organs	389.2	0.799038	90	14270	FALSE
Hyperemesis gravidarum	pregnancy complications	643.1	0.799943	67	14896	FALSE
Lymphoid leukemia	neoplasms	204.1	0.800859	26	14846	FALSE
Myeloid leukemia	neoplasms	204.2	0.801401	75	14895	FALSE
Abnormal serum enzyme levels	digestive	573.9	0.802293	119	12878	FALSE
Ingrowing nail	dermatologic	703.1	0.80289	87	14226	FALSE
Other specified disorders of plasma protein metabolism	endocrine/metabolic	270.38	0.803256	65	14146	FALSE
Epistaxis or throat hemorrhage	respiratory	477	0.804931	179	11038	FALSE
Suicide or self-inflicted injury	mental disorders	297.2	0.805547	42	10308	FALSE
Vitamin D deficiency	endocrine/metabolic	261.4	0.806149	1466	12741	FALSE
Miscarriage; stillbirth	pregnancy complications	634	0.808299	217	13835	FALSE
Amyloidosis	endocrine/metabolic	270.33	0.808452	21	14102	FALSE
Other abnormal glucose	endocrine/metabolic	250.42	0.811159	389	12033	FALSE
Voice disturbance	respiratory	473.4	0.811242	208	11067	FALSE
Arteritis NOS	circulatory system	446.9	0.812638	24	13575	FALSE
Peripheral vascular disease	circulatory system	443	0.814937	350	13901	FALSE
Upper gastrointestinal congenital anomalies	congenital anomalies	750.1	0.815115	28	14377	FALSE
Adverse drug events and drug allergies	injuries & poisonings	979	0.815259	202	12635	FALSE
Cancer of esophagus	neoplasms	150	0.817533	24	14100	FALSE
Malignant neoplasm of small intestine, including duodenum	neoplasms	159.2	0.817633	39	14115	FALSE
Empyema and pneumothorax	respiratory	506	0.817643	251	11884	FALSE
Allergic conjunctivitis	sense organs	371.21	0.818509	175	13200	FALSE
Chronic venous insufficiency [CVI]	circulatory system	456	0.820015	84	12642	FALSE
Malignant neoplasm of retroperitoneum and peritoneum	neoplasms	159.4	0.820622	24	14100	FALSE
Disorders of fluid, electrolyte, and acid-base balance	endocrine/metabolic	276	0.820908	2905	13228	FALSE
Benign neoplasm of other parts of digestive system	neoplasms	211	0.821017	57	14350	FALSE
Keloid scar	dermatologic	701.4	0.821844	131	13994	FALSE
Excessive vomiting in pregnancy	pregnancy complications	643	0.823456	113	14942	FALSE
Other open wound of head and face	injuries & poisonings	870.3	0.823892	66	13482	FALSE
Hematological disorders of newborn	pregnancy complications	656.5	0.825297	45	14660	FALSE
Flat foot	musculoskeletal	735.1	0.825742	75	13616	FALSE
Type 1 diabetes with ophthalmic manifestations	endocrine/metabolic	250.13	0.826307	53	11697	FALSE
Nephritis; nephrosis; renal sclerosis	genitourinary	580	0.828325	367	11648	FALSE
Speech and language disorder	mental disorders	315.2	0.829385	174	14099	FALSE
Other disorders of circulatory system	circulatory system	459	0.829628	183	13391	FALSE
Chronic glomerulonephritis, NOS	genitourinary	580.14	0.829634	50	11331	FALSE
Breast cancer [male]	neoplasms	174.2	0.831093	27	13872	FALSE
Manlignant and unknown neoplasms of brain and nervous system	neoplasms	191	0.831293	93	14962	FALSE
Reflux esophagitis	digestive	530.14	0.831845	107	11020	FALSE
Diseases of esophagus	digestive	530	0.83189	2196	13109	FALSE
Cellulitis and abscess of foot, toe	dermatologic	681.6	0.832002	91	12592	FALSE
Redundant prepuce and phimosis/BXO	genitourinary	604.1	0.832265	105	13872	FALSE
Complication of amputation stump	injuries & poisonings	874	0.832823	33	13449	FALSE
Graves' disease	endocrine/metabolic	242.1	0.833056	123	13435	FALSE
ASCVD	circulatory system	414.2	0.833795	25	12776	FALSE
Hyperhidrosis	dermatologic	705.8	0.833883	37	13914	FALSE
Poisoning by agents primarily affecting the cardiovascular system	injuries & poisonings	972	0.834496	25	12458	FALSE
Other upper respiratory disease	respiratory	479	0.834619	478	11337	FALSE
Glomerulonephritis	genitourinary	580.1	0.834665	132	11413	FALSE
Telogen effluvium	dermatologic	704.12	0.835567	23	14162	FALSE
Disorders involving the immune mechanism	endocrine/metabolic	279	0.83729	318	14449	FALSE
Spondylosis without myelopathy	musculoskeletal	721.1	0.837414	434	13448	FALSE
Ptosis of eyelid	sense organs	374.3	0.839597	50	13075	FALSE
Sinoatrial node dysfunction (Bradycardia)	circulatory system	427.8	0.83983	108	10943	FALSE
Non-proliferative glomerulonephritis	genitourinary	580.12	0.840678	75	11356	FALSE
Obstructive sleep apnea	neurological	327.32	0.841135	1018	13414	FALSE
Other hypertrophic and atrophic conditions of skin	dermatologic	701	0.8426	448	14311	FALSE
Parasomnia	neurological	327.5	0.846395	23	12419	FALSE
Chronic tonsillitis and adenoiditis	respiratory	474.2	0.848793	312	11171	FALSE
Other nutritional deficiency	endocrine/metabolic	263	0.848837	124	11399	FALSE
Arthropathy associated with neurological disorders	musculoskeletal	713.5	0.849022	30	13133	FALSE
Breast cancer [female]	neoplasms	174.1	0.849485	286	14131	FALSE
Periapical abscess	digestive	522.5	0.849861	73	13697	FALSE
Other disorders of stomach and duodenum	digestive	537	0.850862	140	13606	FALSE
Other venous embolism and thrombosis	circulatory system	452	0.851082	586	13144	FALSE
Chronic ulcer of skin	dermatologic	707	0.85365	326	14905	FALSE
Purpura and other hemorrhagic conditions	hematopoietic	287	0.855067	488	13287	FALSE
Abnormal results of function study of liver	digestive	573.7	0.856827	86	12845	FALSE
Left bundle branch block	circulatory system	426.32	0.857987	59	10894	FALSE
Noninfectious gastroenteritis	digestive	558	0.858522	442	12012	FALSE
Atherosclerosis of renal artery	circulatory system	440.1	0.858802	28	13579	FALSE
Congenital anomalies of the eye	congenital anomalies	753	0.859562	28	14865	FALSE
Delayed milestones	endocrine/metabolic	264.3	0.860548	167	11442	FALSE
Other disorders of tympanic membrane	sense organs	384	0.861066	36	13328	FALSE
Respiratory conditions of fetus and newborn	pregnancy complications	656.2	0.861855	139	14754	FALSE
Acute and chronic tonsillitis	respiratory	474	0.861934	347	11206	FALSE
Thrombocytopenia	hematopoietic	287.3	0.86643	466	13265	FALSE
Acute tonsillitis	respiratory	474.1	0.867307	23	10882	FALSE
Malignant neoplasm of female breast	neoplasms	174.11	0.868035	284	14129	FALSE
Prostatitis	genitourinary	601.1	0.86863	29	14215	FALSE
Essential tremor	neurological	333.1	0.86972	33	12368	FALSE
Diseases of pulp and periapical tissues	digestive	522	0.86991	74	13698	FALSE
Chromosomal anomalies and genetic disorders	congenital anomalies	758	0.870649	64	14431	FALSE
Malignant neoplasm of uterus	neoplasms	182	0.870652	47	13564	FALSE
Hypertension	circulatory system	401	0.870959	5348	13907	FALSE
Cervical incompetence	pregnancy complications	636.8	0.871028	60	13678	FALSE
Thyrotoxicosis with or without goiter	endocrine/metabolic	242	0.871421	219	13531	FALSE
Noninflammatory female genital disorders	genitourinary	619	0.872454	553	14206	FALSE
Cough	respiratory	512.8	0.872612	1939	10646	FALSE
Cardiac complications, not elsewhere classified	circulatory system	429.9	0.873479	56	13062	FALSE
Hyperosmolality and/or hypernatremia	endocrine/metabolic	276.11	0.874652	182	10505	FALSE
Other biliary tract disease	digestive	575	0.874751	203	14313	FALSE
Breast conditions, congenital or relating to hormones	genitourinary	612	0.875552	170	13856	FALSE
Acute sinusitis	respiratory	464	0.87706	483	11102	FALSE
Allergic reaction to food	injuries & poisonings	930	0.879095	163	12502	FALSE
Eosinophilia	hematopoietic	288.3	0.879129	30	12041	FALSE
Regional enteritis	digestive	555.1	0.880047	222	11792	FALSE
Missed abortion/Hydatidiform mole	pregnancy complications	634.1	0.880707	88	13706	FALSE
Nerve root and plexus disorders	neurological	353	0.885476	55	13765	FALSE
Dysuria	genitourinary	599.3	0.886815	693	12269	FALSE
Essential hypertension	circulatory system	401.1	0.886846	5167	13726	FALSE
Nausea and vomiting	symptoms	789	0.887195	1956	13151	FALSE
Chronic thyroiditis	endocrine/metabolic	245.2	0.887772	48	13360	FALSE
Benign neoplasm of thyroid glands	neoplasms	226	0.887821	26	14820	FALSE
Pruritus and related conditions	dermatologic	698	0.888455	258	14681	FALSE
Hypertrophy of breast (Gynecomastia)	genitourinary	612.2	0.889582	151	13837	FALSE
Chronic lymphocytic thyroiditis	endocrine/metabolic	245.21	0.889657	47	13359	FALSE
Cardiac arrest	circulatory system	427.42	0.890621	107	10942	FALSE
Abnormality of organs and soft tissues of pelvis complicating pregnancy, childbirth, or the puerperium	pregnancy complications	654.1	0.892612	141	14457	FALSE
Circulatory disease NEC	circulatory system	459.9	0.89316	119	13327	FALSE
Hx of malignant neoplasm of oral cavity and pharynx	neoplasms	149.5	0.893936	46	14960	FALSE
Gangrene	symptoms	791	0.894032	83	15129	FALSE
Postoperative infection	infectious diseases	080	0.894309	186	14639	FALSE
Cardiac arrest and ventricular fibrillation	circulatory system	427.4	0.894903	132	10967	FALSE
Conjunctivitis, noninfectious	sense organs	371.2	0.895127	189	13214	FALSE
Cancer of stomach	neoplasms	151	0.895497	48	14124	FALSE
Noninflammatory disorders of vagina	genitourinary	619.4	0.896089	305	13958	FALSE
Disorders of function of stomach	digestive	536	0.896278	274	13740	FALSE
Chronic kidney disease, Stage I or II	genitourinary	585.4	0.896537	326	11607	FALSE
Viral warts & HPV	infectious diseases	078	0.896735	191	11601	FALSE
Benign neoplasm of lip, oral cavity, and pharynx	neoplasms	210	0.899704	28	14942	FALSE
Fracture of radius and ulna	injuries & poisonings	803.2	0.899964	186	13110	FALSE
Urinary tract infection	genitourinary	591	0.900898	1656	13094	FALSE
Seborrheic keratosis	dermatologic	702.2	0.901084	60	14942	FALSE
Sickle cell anemia	hematopoietic	282.5	0.901367	375	9590	FALSE
Memory loss	mental disorders	292.3	0.901536	165	12953	FALSE
Lipoma of skin and subcutaneous tissue	neoplasms	214.1	0.901805	52	14921	FALSE
Other disorders of gallbladder	digestive	575.7	0.901877	46	14156	FALSE
Heart valve replaced	circulatory system	395.6	0.903334	114	13113	FALSE
Symptoms involving digestive system	digestive	561	0.9038	530	12100	FALSE
Painful respiration	respiratory	512.2	0.905474	290	8997	FALSE
Anxiety disorder	mental disorders	300.1	0.905594	1012	11278	FALSE
Tobacco use disorder	mental disorders	318	0.905973	1316	13400	FALSE
Hemorrhagic disorder due to intrinsic circulating anticoagulants	hematopoietic	286.5	0.905993	37	12836	FALSE
Endocrine and metabolic disturbances of fetus and newborn	pregnancy complications	656.3	0.906612	67	14682	FALSE
Arthropathy associated with other disorders classified elsewhere	musculoskeletal	713	0.906682	52	13155	FALSE
Hypertrophic obstructive cardiomyopathy	circulatory system	425.11	0.906973	26	14031	FALSE
Musculoskeletal symptoms referable to limbs	symptoms	771	0.907222	174	13462	FALSE
Bundle branch block	circulatory system	426.3	0.907467	100	10935	FALSE
Posttraumatic stress disorder	mental disorders	300.9	0.907639	320	10586	FALSE
Streptococcus infection	infectious diseases	041.2	0.908013	251	12938	FALSE
Pneumonitis due to inhalation of food or vomitus	respiratory	501	0.909021	123	11756	FALSE
Benign neoplasm of bone and articular cartilage	neoplasms	213	0.910244	40	12813	FALSE
Bronchitis	respiratory	497	0.910479	144	12176	FALSE
Dyspepsia and other specified disorders of function of stomach	digestive	536.8	0.911322	113	13579	FALSE
Strabismus and other disorders of binocular eye movements	sense organs	378	0.912604	140	13632	FALSE
Dependence on respirator [Ventilator] or supplemental oxygen	respiratory	509.8	0.913922	189	11822	FALSE
Other hypertensive complications	circulatory system	401.3	0.9145	446	9005	FALSE
Insect bite	injuries & poisonings	912	0.914921	55	14685	FALSE
Transitory tachypnea or apnea of newborn	pregnancy complications	656.26	0.915176	62	14677	FALSE
Malignant neoplasm of ovary and other uterine adnexa	neoplasms	184.1	0.915716	46	14090	FALSE
Other symptoms of respiratory system	respiratory	512	0.916346	3814	12521	FALSE
Carditis	circulatory system	420	0.916424	297	14302	FALSE
Cholelithiasis with acute cholecystitis	digestive	574.11	0.917001	28	14138	FALSE
Peripheral retinal degenerations	sense organs	362.6	0.917238	26	13661	FALSE
Atrophic gastritis	digestive	535.2	0.921515	99	13565	FALSE
Pulmonary insufficiency or respiratory failure following trauma and surgery	respiratory	509.3	0.921972	241	11874	FALSE
Adrenal hypofunction	endocrine/metabolic	255.2	0.9222	117	13424	FALSE
Allergies, other	injuries & poisonings	949	0.923407	144	12483	FALSE
Immunity deficiency	endocrine/metabolic	279.1	0.923517	247	14378	FALSE
Pituitary hypofunction	endocrine/metabolic	253.2	0.924144	33	13340	FALSE
Disorders of other cranial nerves	neurological	352	0.924627	110	13820	FALSE
Fracture of upper limb	injuries & poisonings	803	0.925288	320	13244	FALSE
Congenital deformities of feet	congenital anomalies	755.1	0.925766	38	14792	FALSE
Osteochondropathies	musculoskeletal	732	0.925828	46	12883	FALSE
Other demyelinating diseases of central nervous system	neurological	341	0.926063	76	12411	FALSE
Congenital anomalies of face and neck	congenital anomalies	749	0.930379	83	14955	FALSE
Abnormal findings on mammogram or breast exam	genitourinary	611	0.931294	490	14176	FALSE
Pericarditis	circulatory system	420.2	0.931816	237	14242	FALSE
Allergic rhinitis	respiratory	476	0.931902	1344	12203	FALSE
Cholelithiasis with other cholecystitis	digestive	574.12	0.932242	67	14177	FALSE
Shock	symptoms	797	0.932787	247	14911	FALSE
Other disorders of ear	sense organs	388	0.935172	20	14200	FALSE
Gastrointestinal complications	digestive	569.2	0.936536	295	13427	FALSE
Impetigo	dermatologic	686.2	0.936566	35	12536	FALSE
Candidiasis of skin and nails	infectious diseases	112.3	0.936655	56	12506	FALSE
Unspecified erythematous condition	dermatologic	695.9	0.938815	22	13425	FALSE
Develomental delays and disorders	mental disorders	315	0.938839	393	14318	FALSE
Other disorders of intestine	digestive	569	0.939091	508	13640	FALSE
Scar conditions and fibrosis of skin	dermatologic	701.2	0.939911	97	13960	FALSE
Other mental disorder	mental disorders	306	0.94138	421	10687	FALSE
Idiopathic fibrosing alveolitis	respiratory	504.1	0.942082	26	11659	FALSE
Chronic obstructive asthma	respiratory	495.1	0.942274	109	12141	FALSE
Arterial embolism and thrombosis of lower extremity artery	circulatory system	444.1	0.942705	25	13576	FALSE
Diseases and other conditions of the tongue	digestive	529	0.94299	25	14437	FALSE
Noninfectious disorders of lymphatic channels	circulatory system	450	0.94355	161	15095	FALSE
Atherosclerosis of native arteries of the extremities with ulceration or gangrene	circulatory system	440.21	0.943906	76	13627	FALSE
Congenital anomalies of skull and face bones	congenital anomalies	749.2	0.944209	44	14916	FALSE
Hypothermia/Chills	symptoms	780	0.94462	53	15040	FALSE
Diseases of the larynx and vocal cords	respiratory	473	0.946368	294	11153	FALSE
Melanomas of skin, dx or hx	neoplasms	172.1	0.947011	22	14676	FALSE
Melanomas of skin	neoplasms	172.11	0.947011	22	14676	FALSE
Dislocation	injuries & poisonings	830	0.947724	280	14555	FALSE
Perinatal disorders of digestive system	pregnancy complications	656.6	0.947809	25	14640	FALSE
Pain in joint	musculoskeletal	745	0.948933	2959	13001	FALSE
Acquired toe deformities	musculoskeletal	735.2	0.949742	152	13693	FALSE
Muscle weakness	symptoms	772.3	0.949767	666	14026	FALSE
Acute bronchospasm	respiratory	498	0.95041	46	12078	FALSE
Type 2 diabetes with ketoacidosis	endocrine/metabolic	250.21	0.951255	50	11694	FALSE
Other disorders of metabolism	endocrine/metabolic	277	0.951264	214	14614	FALSE
Atrial flutter	circulatory system	427.22	0.952796	167	11002	FALSE
Hyperplasia of prostate	genitourinary	600	0.954096	281	14467	FALSE
Other and unspecified disorders of back	musculoskeletal	724	0.957723	146	13160	FALSE
Acquired coagulation factor deficiency	hematopoietic	286.4	0.960806	21	12820	FALSE
Other disorders of cervical region	musculoskeletal	723	0.962681	87	13101	FALSE
Viral hepatitis	infectious diseases	070	0.96288	432	11842	FALSE
Cholecystitis without cholelithiasis	digestive	574.3	0.963049	69	14179	FALSE
Open wounds of extremities	injuries & poisonings	871	0.96435	271	13687	FALSE
Glycosuria or Acetonuria	endocrine/metabolic	250.5	0.964932	21	11665	FALSE
Cardiogenic shock	symptoms	797.1	0.96649	104	14768	FALSE
Premenopausal menorrhagia	genitourinary	627.4	0.966841	46	12218	FALSE
Uterine leiomyoma	neoplasms	218.1	0.967009	431	14103	FALSE
Abnormal coagulation profile	hematopoietic	286.9	0.967477	61	12860	FALSE
Intervertebral disc disorders	musculoskeletal	722	0.969303	628	13642	FALSE
Vesicoureteral reflux	genitourinary	586.12	0.969574	24	11305	FALSE
Congenital hypothyroidism	endocrine/metabolic	244.5	0.970192	23	13335	FALSE
Chronic inflammatory pelvic disease	genitourinary	614.32	0.970296	40	13239	FALSE
Benign neoplasm of uterus	neoplasms	218	0.971009	432	14104	FALSE
Juvenile osteochondrosis	musculoskeletal	732.1	0.972341	21	12858	FALSE
Hammer toe (acquired)	musculoskeletal	735.21	0.972707	125	13666	FALSE
Myalgia and myositis unspecified	symptoms	770	0.974405	553	14409	FALSE
Other sprains and strains	injuries & poisonings	842	0.974708	64	13095	FALSE
Other specified osteoporosis	musculoskeletal	743.13	0.974877	112	13887	FALSE
Sicca syndrome	dermatologic	709.2	0.975937	51	13338	FALSE
Disorders of uterus, NEC	genitourinary	619.2	0.97659	111	13764	FALSE
Diseases of the oral soft tissues, excluding lesions specific for gingiva and tongue	digestive	528	0.976888	190	14602	FALSE
Degeneration of intervertebral disc	musculoskeletal	722.6	0.97697	493	13507	FALSE
Abnormal results of function study of thyroid	endocrine/metabolic	246.7	0.97758	26	13338	FALSE
Inflammation of eyelids	sense organs	371.3	0.979472	129	13154	FALSE
Ascites (non malignant)	digestive	572	0.980623	339	13098	FALSE
Hyperventilation	respiratory	513.4	0.980746	178	14201	FALSE
Disease of tricuspid valve	circulatory system	394.7	0.980792	198	13197	FALSE
Acute and subacute necrosis of liver	digestive	573.4	0.981029	53	12812	FALSE
Proteinuria	endocrine/metabolic	269	0.981214	464	14545	FALSE
Tracheostomy complications	respiratory	519.1	0.981427	32	13858	FALSE
Cardiomegaly	circulatory system	416	0.982066	1021	13821	FALSE
Polymyalgia Rheumatica	musculoskeletal	717	0.982637	25	15111	FALSE
Erectile dysfunction [ED]	genitourinary	605	0.983962	360	14127	FALSE
Otorrhea	sense organs	381.9	0.984571	42	13334	FALSE
Poisoning by psychotropic agents	injuries & poisonings	969	0.98571	27	12460	FALSE
Vitiligo	dermatologic	694.1	0.985933	23	13426	FALSE
Other dyspnea	respiratory	512.9	0.986181	1838	10545	FALSE
Stomatitis and mucositis	digestive	528.1	0.986499	71	14483	FALSE
Congenital anomalies of skin	dermatologic	691	0.986747	35	13438	FALSE
Anatomical abnormatilies of kidney and ureters	genitourinary	586.1	0.98728	25	11306	FALSE
Nystagmus and other irregular eye movements	sense organs	378.2	0.987457	28	13520	FALSE
Secondary malignant neoplasm of skin	neoplasms	198.7	0.98832	28	12837	FALSE
Shortness of breath	respiratory	512.7	0.989758	2280	10987	FALSE
Hyperglyceridemia	endocrine/metabolic	272.12	0.989918	42	11523	FALSE
Hypermetropia	sense organs	367.8	0.990336	68	14029	FALSE
Neonatal bradycardia or tachycardia	pregnancy complications	656.9	0.990472	24	14639	FALSE
Bariatric surgery	digestive	539	0.99114	278	15095	FALSE
Psychosis	mental disorders	295.3	0.991358	167	10433	FALSE
Cystoid macular degeneration of retina	sense organs	362.23	0.991477	65	13700	FALSE
Exophthalmos	endocrine/metabolic	242.3	0.99194	34	13346	FALSE
Urinary complications NEC	genitourinary	597.2	0.991975	30	14005	FALSE
Rheumatic disease of the heart valves	circulatory system	394	0.995075	292	13291	FALSE
Eating disorder	mental disorders	305.2	0.995676	52	10318	FALSE
Retinopathy of prematurity	sense organs	362.1	0.996419	40	13675	FALSE
Mitral valve stenosis and aortic valve stenosis	circulatory system	394.1	0.996545	49	13048	FALSE
Lump or mass in breast	genitourinary	611.3	0.997689	350	14036	FALSE
Keratoderma, acquired	dermatologic	701.1	0.997752	36	13899	FALSE
