# Supplementary material for: Nutrient State, Aging, and Diet Modulate SAM50-Dependent Mitochondrial Remodeling and Systemic Metabolic Signatures
Source: Research Square preprint supplement (doi:10.21203/rs.3.rs-8704245/v1), 2026-02-16
Supplement: Supplementary file 5 [file edac2b8442f34484ab4ccdc0.xlsx]

## Sheet: Sheet 1 - gwas-association-down
PUBMEDID	FIRST AUTHOR	STUDY	DISEASE/TRAIT	INITIAL SAMPLE SIZE	REGION	CHR_ID	CHR_POS	MAPPED_GENE	SNP_GENE_IDS	STRONGEST SNP-RISK ALLELE	SNPS	SNP_ID_CURRENT	CONTEXT	P-VALUE	PVALUE_MLOG	OR or BETA	95% CI (TEXT)	MAPPED_TRAIT	STUDY ACCESSION	GENOTYPING TECHNOLOGY
29385134	Kawaguchi T	Risk estimation model for nonalcoholic fatty liver disease in the Japanese using multiple genetic markers.	Nonalcoholic steatohepatitis-derived hepatocellular carcinoma	58 Japanese ancestry cases, 7,672 Japanese ancestry controls	22q13.31	22	43995806	SAMM50	ENSG00000100347	rs2143571-A	rs2143571	2143571	intron_variant	9e-07	6.04576	2.7	[1.82-4.0]	hepatocellular carcinoma, non-alcoholic steatohepatitis	GCST005309	Genome-wide genotyping array
29271184	Chung GE	Genetic Polymorphisms of PNPLA3 and SAMM50 Are Associated with Nonalcoholic Fatty Liver Disease in a Korean Population.	Nonalcoholic fatty liver disease	1,593 East Asian ancestry cases, 2,816 East Asian ancestry controls	22q13.31	22	43995806	SAMM50	ENSG00000100347	rs2143571-A	rs2143571	2143571	intron_variant	2e-11	10.699	1.437	[1.292-1.597]	non-alcoholic fatty liver disease	GCST005190	Genome-wide genotyping array
26780889	Below JE	Meta-analysis of lipid-traits in Hispanics identifies novel loci, population-specific effects, and tissue-specific enrichment of eQTLs.	Cholesterol, total	4,383 Mexican ancestry individuals	22q13.31	22	43982119	SAMM50	ENSG00000100347	rs2235776-C	rs2235776	2235776	intron_variant	3e-08	7.52288	0.026	[0.016-0.036] unit increase	total cholesterol measurement	GCST003302	Genome-wide genotyping array
34841290	Ghodsian N	Electronic health record-based genome-wide meta-analysis provides insights on the genetic architecture of non-alcoholic fatty liver disease.	Nonalcoholic fatty liver disease	8,434 European ancestry cases, 770,180 European ancestry controls	22q13.31	22	43965617	SAMM50	ENSG00000100347	rs5764430-?	rs5764430	5764430	intron_variant	7e-12	11.1549	0.136027	[0.097-0.175] unit decrease	non-alcoholic fatty liver disease	GCST90091033	Genome-wide genotyping array
22719876	Kawaguchi T	Genetic polymorphisms of the human PNPLA3 gene are strongly associated with severity of non-alcoholic fatty liver disease in Japanese.	Nonalcoholic fatty liver disease	529 Japanese ancestry cases, 932 Japanese ancestry controls	22q13.31	22	43995806	SAMM50	ENSG00000100347	rs2143571-A	rs2143571	2143571	intron_variant	6e-07	6.22185	1.47	[1.27-1.72]	non-alcoholic fatty liver disease	GCST001576	Genome-wide genotyping array
22719876	Kawaguchi T	Genetic polymorphisms of the human PNPLA3 gene are strongly associated with severity of non-alcoholic fatty liver disease in Japanese.	Nonalcoholic fatty liver disease	529 Japanese ancestry cases, 932 Japanese ancestry controls	22q13.31	22	43998522	SAMM50	ENSG00000100347	rs2073080-T	rs2073080	2073080	intergenic_variant	8e-07	6.09691	1.47	[1.26-1.71]	non-alcoholic fatty liver disease	GCST001576	Genome-wide genotyping array
30054458	Xue A	Genome-wide association analyses identify 143 risk variants and putative regulatory mechanisms for type 2 diabetes.	Type 2 diabetes	61,714 European ancestry cases, 1,178 Pakistani ancestry cases, 593,952 European ancestry controls, 2,472 Pakistani ancestry controls	22q13.31	22	43981562	SAMM50	ENSG00000100347	rs4823182-G	rs4823182	4823182	intron_variant	3e-10	9.52288	0.0482	[0.033-0.063] unit increase	type 2 diabetes mellitus	GCST006867	Genome-wide genotyping array
30718733	Moon S	The Korea Biobank Array: Design and Identification of Coding Variants Associated with Blood Biochemical Traits.	Alanine aminotransferase levels	6,949 Korean ancestry individuals	22q13.31	22	43972242	SAMM50	ENSG00000100347	rs3761472-G	rs3761472	3761472	missense_variant	7e-06	5.1549	0.0362	[0.02-0.052] unit increase	serum alanine aminotransferase amount	GCST007440	Genome-wide genotyping array
33462484	Sinnott-Armstrong N	Genetics of 35 blood and urine biomarkers in the UK Biobank.	Aspartate aminotransferase to alanine aminotransferase ratio	341,165 European ancestry individuals, 5,981 African ancestry individuals, 7,309 South Asian ancestry individuals	22q13.31	22	43990401	SAMM50	ENSG00000100347	rs7587-T	rs7587	7587	synonymous_variant	1e-17	17	0.0243	[0.019-0.03] unit increase	aspartate aminotransferase to alanine aminotransferase ratio	GCST90019498	Genome-wide genotyping array
33462484	Sinnott-Armstrong N	Genetics of 35 blood and urine biomarkers in the UK Biobank.	Aspartate aminotransferase levels	341,246 European ancestry individuals, 5,982 African ancestry individuals, 7,313 South Asian ancestry individuals	22q13.31	22	43990401	SAMM50	ENSG00000100347	rs7587-T	rs7587	7587	synonymous_variant	2e-43	42.699	0.0394	[0.034-0.045] unit decrease	aspartate aminotransferase measurement	GCST90019497	Genome-wide genotyping array
33462484	Sinnott-Armstrong N	Genetics of 35 blood and urine biomarkers in the UK Biobank.	Alanine aminotransferase levels	342,387 European ancestry individuals, 6,017 African ancestry individuals, 7,325 South Asian ancestry individuals	22q13.31	22	43990401	SAMM50	ENSG00000100347	rs7587-T	rs7587	7587	synonymous_variant	2e-45	44.699	0.0402	[0.035-0.046] unit decrease	serum alanine aminotransferase amount	GCST90019492	Genome-wide genotyping array
35121771	Choe EK	Leveraging deep phenotyping from health check-up cohort with 10,000 Korean individuals for phenome-wide association study of 136 traits.	Glutamic pyruvic transaminase levels	9,663 Korean ancestry individuals	22q13.31	22	43998522	SAMM50	ENSG00000100347	rs2073080-T	rs2073080	2073080	intergenic_variant	3e-10	9.52288	1.53366	IU/L decrease	serum alanine aminotransferase amount	GCST90104161	Genome-wide genotyping array
40316537	Pagadala MS	Discovery of novel ancestry specific genes for androgens and hypogonadism in Million Veteran Program Men.	Hypogonadism	13,328 Admixed American ancestry males	22q13.31	22	43981562	SAMM50	ENSG00000100347	rs4823182-G	rs4823182	4823182	intron_variant	2e-08	7.69897	0.147822	[0.098-0.198] unit decrease	hypogonadism	GCST90503324	Genome-wide genotyping array
40436827	Jee YH	Genome-wide association studies in a large Korean cohort identify quantitative trait loci for 36 traits and illuminate their genetic architectures.	Aspartate aminotransferase levels	507,850 East Asian ancestry individuals, 420,829 European ancestry individuals	22q13.31	22	43984887	SAMM50	ENSG00000100347	rs12167845-T	rs12167845	12167845	intron_variant	0	329.699	0.0773	[0.073-0.081] unit decrease	aspartate aminotransferase measurement	GCST90662897	Genome-wide genotyping array
33067605	Folkersen L	Genomic and drug target evaluation of 90 cardiovascular proteins in 30,931 individuals.	Osteoprotegerin levels	21,758 European ancestry individuals	22q13.31	22	43972242	SAMM50	ENSG00000100347	rs3761472-A	rs3761472	3761472	missense_variant	5e-08	7.30103	0.0549	unit decrease	tumor necrosis factor receptor superfamily member 11B amount	GCST90012002	Genome-wide genotyping array
34503513	Harshfield EL	Genome-wide analysis of blood lipid metabolites in over 5000 South Asians reveals biological insights at cardiometabolic disease loci.	Triacylglycerol_56:7_[M+NH4]1+ levels	13,814 British ancestry individuals	22q13.31	22	43990401	SAMM50	ENSG00000100347	rs7587-T	rs7587	7587	synonymous_variant	2e-10	9.69897	0.113349	[0.079-0.148] unit decrease	triglyceride measurement	GCST90060551	Genome-wide genotyping array
34503513	Harshfield EL	Genome-wide analysis of blood lipid metabolites in over 5000 South Asians reveals biological insights at cardiometabolic disease loci.	Triacylglycerol_58:7_[M+NH4]1+ levels	13,814 British ancestry individuals	22q13.31	22	43990401	SAMM50	ENSG00000100347	rs7587-T	rs7587	7587	synonymous_variant	3e-10	9.52288	0.113649	[0.078-0.149] unit decrease	triglyceride measurement	GCST90060564	Genome-wide genotyping array
34503513	Harshfield EL	Genome-wide analysis of blood lipid metabolites in over 5000 South Asians reveals biological insights at cardiometabolic disease loci.	Triacylglycerol_56:6_[M+NH4]1+ levels	13,814 British ancestry individuals	22q13.31	22	43972242	SAMM50	ENSG00000100347	rs3761472-G	rs3761472	3761472	missense_variant	7e-13	12.1549	0.140168	[0.1-0.18] unit increase	triglyceride measurement	GCST90060553	Genome-wide genotyping array
34503513	Harshfield EL	Genome-wide analysis of blood lipid metabolites in over 5000 South Asians reveals biological insights at cardiometabolic disease loci.	Triacylglycerol_56:6_[M+NH4]1+ levels	13,814 British ancestry individuals	22q13.31	22	43990401	SAMM50	ENSG00000100347	rs7587-T	rs7587	7587	synonymous_variant	7e-14	13.1549	0.128674	[0.095-0.162] unit decrease	triglyceride measurement	GCST90060553	Genome-wide genotyping array
34503513	Harshfield EL	Genome-wide analysis of blood lipid metabolites in over 5000 South Asians reveals biological insights at cardiometabolic disease loci.	Triacylglycerol_56:6_[M+NH4]1+ levels	13,814 British ancestry individuals	22q13.31	22	43995806	SAMM50	ENSG00000100347	rs2143571-A	rs2143571	2143571	intron_variant	4e-10	9.39794	0.116522	[0.08-0.153] unit increase	triglyceride measurement	GCST90060553	Genome-wide genotyping array
34503513	Harshfield EL	Genome-wide analysis of blood lipid metabolites in over 5000 South Asians reveals biological insights at cardiometabolic disease loci.	Diacylglycerol_38:5_[M+H-H2O]1+ levels	13,814 British ancestry individuals	22q13.31	22	43990401	SAMM50	ENSG00000100347	rs7587-T	rs7587	7587	synonymous_variant	1e-14	14	0.0767797	[0.057-0.096] unit decrease	diacylglycerol 38:5 measurement	GCST90060200	Genome-wide genotyping array
35213538	Richardson TG	Characterising metabolomic signatures of lipid-modifying therapies through drug target mendelian randomisation.	Triglycerides to total lipids ratio in very large VLDL	114,160 European ancestry individuals	22q13.31	22	43983685	SAMM50	ENSG00000100347	rs2294922-G	rs2294922	2294922	intron_variant	6e-09	8.22185	0.028714	[0.019-0.038] unit increase	triglycerides:total lipids ratio, blood VLDL cholesterol amount	GCST90093027	Genome-wide genotyping array
35213538	Richardson TG	Characterising metabolomic signatures of lipid-modifying therapies through drug target mendelian randomisation.	Free cholesterol to total lipids ratio in very large VLDL	114,160 European ancestry individuals	22q13.31	22	43983685	SAMM50	ENSG00000100347	rs2294922-G	rs2294922	2294922	intron_variant	2e-08	7.69897	0.0279289	[0.018-0.038] unit decrease	free cholesterol:total lipids ratio, blood VLDL cholesterol amount	GCST90093021	Genome-wide genotyping array
35213538	Richardson TG	Characterising metabolomic signatures of lipid-modifying therapies through drug target mendelian randomisation.	Cholesterol to total lipids ratio in large VLDL	115,071 European ancestry individuals	22q13.31	22	43983685	SAMM50	ENSG00000100347	rs2294922-G	rs2294922	2294922	intron_variant	1e-11	11	0.0337963	[0.024-0.044] unit decrease	cholesterol:total lipids ratio, blood VLDL cholesterol amount	GCST90092869	Genome-wide genotyping array
35047847	Miao Z	Identification of 90 NAFLD GWAS loci and establishment of NAFLD PRS and causal role of NAFLD in coronary artery disease.	Nonalcoholic fatty liver disease (imputed)	28,396 European ancestry cases, 108,652 European ancestry controls	22q13.31	22	43987737	SAMM50	ENSG00000100347	rs6006469-?	rs6006469	6006469	intron_variant	2e-10	9.69897	0.00594817	[0.0041-0.0078] unit decrease	non-alcoholic fatty liver disease	GCST90094908	Genome-wide genotyping array
36738649	Ding H	Shared genetics of psychiatric disorders and type 2 diabetes:a large-scale genome-wide cross-trait analysis.	Type 2 diabetes and Attention deficit hiperactivty disorder or schyzophrenia or obsessive compulsive disorder	62,892 European ancestry type II diabetes cases, 19,099 European ancestry attention deficit hiperactivity disorder cases, 40,675 European ancestry schizophrenia cases, 2,688 European ancestry obsessive compulsive disorder cases, 702,298 European ancestry controls	22q13.31	22	43995708	SAMM50	ENSG00000100347	rs2179642-?	rs2179642	2179642	intron_variant	3e-09	8.52288			attention deficit hyperactivity disorder, schizophrenia, obsessive-compulsive symptom measurement, type 2 diabetes mellitus	GCST90624687	Genome-wide genotyping array
40465716	Liu TY	Diversity and longitudinal records: Genetic architecture of disease associations and polygenic risk in the Taiwanese Han population.	Gout (PheCode 274.1)	9,142 Han Taiwanese ancestry cases, 225,340 Han Taiwanese ancestry controls, 3,179 European ancestry cases, 403,457 European ancestry controls	22q13.31	22	43985602	SAMM50	ENSG00000100347	rs4823109-?	rs4823109	4823109	intron_variant	3e-08	7.52288	0.0815	[0.052-0.111] unit decrease	gout	GCST90651115	Genome-wide genotyping array
36513072	Park J	Exome-wide association analysis of CT imaging-derived hepatic fat in a medical biobank.	Maximum measurement of hepatic fat	2,814 African ancestry individuals, 7,096 European ancestry individuals, 113 Hispanic or Latin American individuals, 103 East Asian ancestry individuals, 84 South Asian ancestry individuals	22q13.31	22	43972242	SAMM50	ENSG00000100347	rs3761472-?	rs3761472	3761472	missense_variant	6e-17	16.2218	1.451	[1.11-1.79] unit increase	liver fat measurement	GCST90255386	Exome-wide sequencing
36513072	Park J	Exome-wide association analysis of CT imaging-derived hepatic fat in a medical biobank.	Median measurement of hepatic fat	7,096 European ancestry individuals	22q13.31	22	43972242	SAMM50	ENSG00000100347	rs3761472-?	rs3761472	3761472	missense_variant	5e-13	12.301	1.323	[0.96-1.68] unit increase	liver fat measurement	GCST90255381	Exome-wide sequencing
36513072	Park J	Exome-wide association analysis of CT imaging-derived hepatic fat in a medical biobank.	Minimum measurement of hepatic fat	7,096 European ancestry individuals	22q13.31	22	43972242	SAMM50	ENSG00000100347	rs3761472-?	rs3761472	3761472	missense_variant	2e-07	6.69897	1.02	[0.64-1.4] unit increase	liver fat measurement	GCST90255382	Exome-wide sequencing
36513072	Park J	Exome-wide association analysis of CT imaging-derived hepatic fat in a medical biobank.	Median measurement of hepatic fat	2,814 African ancestry individuals, 7,096 European ancestry individuals, 113 Hispanic or Latin American individuals, 103 East Asian ancestry individuals, 84 South Asian ancestry individuals	22q13.31	22	43972242	SAMM50	ENSG00000100347	rs3761472-?	rs3761472	3761472	missense_variant	2e-16	15.699	1.251	[0.95-1.55] unit increase	liver fat measurement	GCST90255384	Exome-wide sequencing
36513072	Park J	Exome-wide association analysis of CT imaging-derived hepatic fat in a medical biobank.	Maximum measurement of hepatic fat	7,096 European ancestry individuals	22q13.31	22	43972242	SAMM50	ENSG00000100347	rs3761472-?	rs3761472	3761472	missense_variant	7e-13	12.1549	1.519	[1.11-1.93] unit increase	liver fat measurement	GCST90255380	Exome-wide sequencing
36513072	Park J	Exome-wide association analysis of CT imaging-derived hepatic fat in a medical biobank.	Maximum measurement of hepatic fat	7,096 European ancestry individuals	22q13.31	22	43983958	SAMM50	ENSG00000100347	rs8418-?	rs8418	8418	missense_variant	5e-06	5.30103	0.723	[0.41-1.03] unit increase	liver fat measurement	GCST90255380	Exome-wide sequencing
36513072	Park J	Exome-wide association analysis of CT imaging-derived hepatic fat in a medical biobank.	Minimum measurement of hepatic fat	2,814 African ancestry individuals, 7,096 European ancestry individuals, 113 Hispanic or Latin American individuals, 103 East Asian ancestry individuals, 84 South Asian ancestry individuals	22q13.31	22	43972242	SAMM50	ENSG00000100347	rs3761472-?	rs3761472	3761472	missense_variant	3e-11	10.5229	1.084	[0.76-1.4] unit increase	liver fat measurement	GCST90255385	Exome-wide sequencing
36513072	Park J	Exome-wide association analysis of CT imaging-derived hepatic fat in a medical biobank.	Median measurement of hepatic fat	2,814 African ancestry individuals, 7,096 European ancestry individuals, 113 Hispanic or Latin American individuals, 103 East Asian ancestry individuals, 84 South Asian ancestry individuals	22q13.31	22	43972242	SAMM50	ENSG00000100347	rs3761472-?	rs3761472	3761472	missense_variant	6e-19	18.2218	1.325	[1.03-1.62] unit increase	liver fat measurement	GCST90255387	Exome-wide sequencing
36513072	Park J	Exome-wide association analysis of CT imaging-derived hepatic fat in a medical biobank.	Minimum measurement of hepatic fat	2,814 African ancestry individuals, 7,096 European ancestry individuals, 113 Hispanic or Latin American individuals, 103 East Asian ancestry individuals, 84 South Asian ancestry individuals	22q13.31	22	43972242	SAMM50	ENSG00000100347	rs3761472-?	rs3761472	3761472	missense_variant	1e-12	12	1.126	[0.81-1.44] unit increase	liver fat measurement	GCST90255388	Exome-wide sequencing
36764567	Davyson E	Metabolomic Investigation of Major Depressive Disorder Identifies a Potentially Causal Association With Polyunsaturated Fatty Acids.	Cholesterol to total lipids in large VLDL percentage (UKB data field 23590)	88,321 European ancestry individuals	22q13.31	22	43995354	SAMM50	ENSG00000100347	rs2281298-A	rs2281298	2281298	intron_variant	7e-11	10.1549	0.0396576	[0.028-0.052] unit increase	cholesterol to total lipids in large VLDL percentage	GCST90269687	Genome-wide genotyping array
40545721	Sun Y	Genome-wide association studies and multi-omics integrative analysis reveal novel loci and their molecular mechanisms for circulating polyunsaturated, monounsaturated, and saturated fatty acids.	Monounsaturated fatty acids to total fatty acids percentage	110,346 European ancestry males	22q13.31	22	43983685	SAMM50	ENSG00000100347	rs2294922-C	rs2294922	2294922	intron_variant	1e-12	12			fatty acid amount	GCST90502389	Genome-wide genotyping array
40545721	Sun Y	Genome-wide association studies and multi-omics integrative analysis reveal novel loci and their molecular mechanisms for circulating polyunsaturated, monounsaturated, and saturated fatty acids.	Monounsaturated fatty acid levels	110,346 European ancestry males	22q13.31	22	43983685	SAMM50	ENSG00000100347	rs2294922-C	rs2294922	2294922	intron_variant	5e-12	11.301			fatty acid amount	GCST90502363	Genome-wide genotyping array
29385134	Kawaguchi T	Risk estimation model for nonalcoholic fatty liver disease in the Japanese using multiple genetic markers.	Nonalcoholic fatty liver disease	902 Japanese ancestry cases, 7,672 Japanese ancestry controls	22q13.31	22	43958231	SAMM50, PNPLA3	ENSG00000100347, ENSG00000100344	rs738491-T	rs738491	738491	intron_variant	1e-18	18	1.6	[1.44-1.77]	non-alcoholic fatty liver disease	GCST005308	Genome-wide genotyping array
33462484	Sinnott-Armstrong N	Genetics of 35 blood and urine biomarkers in the UK Biobank.	Alanine aminotransferase levels	342,387 European ancestry individuals, 6,017 African ancestry individuals, 7,325 South Asian ancestry individuals	22q13.31	22	43964121	PNPLA3, SAMM50	ENSG00000100344, ENSG00000100347	rs117826724-C	rs117826724	117826724	intron_variant	1e-11	11	0.0636	[0.045-0.082] unit increase	serum alanine aminotransferase amount	GCST90019492	Genome-wide genotyping array
33462484	Sinnott-Armstrong N	Genetics of 35 blood and urine biomarkers in the UK Biobank.	Alanine aminotransferase levels	342,387 European ancestry individuals, 6,017 African ancestry individuals, 7,325 South Asian ancestry individuals	22q13.31	22	43959813	SAMM50, PNPLA3	ENSG00000100347, ENSG00000100344	rs76015644-G	rs76015644	76015644	intron_variant	5e-24	23.301	0.0858	[0.069-0.102] unit increase	serum alanine aminotransferase amount	GCST90019492	Genome-wide genotyping array
33462484	Sinnott-Armstrong N	Genetics of 35 blood and urine biomarkers in the UK Biobank.	Aspartate aminotransferase to alanine aminotransferase ratio	341,165 European ancestry individuals, 5,981 African ancestry individuals, 7,309 South Asian ancestry individuals	22q13.31	22	43959813	SAMM50, PNPLA3	ENSG00000100347, ENSG00000100344	rs76015644-G	rs76015644	76015644	intron_variant	2e-12	11.699	0.0599	[0.043-0.077] unit decrease	aspartate aminotransferase to alanine aminotransferase ratio	GCST90019498	Genome-wide genotyping array
33462484	Sinnott-Armstrong N	Genetics of 35 blood and urine biomarkers in the UK Biobank.	Aspartate aminotransferase levels	341,246 European ancestry individuals, 5,982 African ancestry individuals, 7,313 South Asian ancestry individuals	22q13.31	22	43959813	SAMM50, PNPLA3	ENSG00000100347, ENSG00000100344	rs76015644-G	rs76015644	76015644	intron_variant	9e-19	18.0458	0.0752	[0.059-0.092] unit increase	aspartate aminotransferase measurement	GCST90019497	Genome-wide genotyping array
33462484	Sinnott-Armstrong N	Genetics of 35 blood and urine biomarkers in the UK Biobank.	Aspartate aminotransferase levels	341,246 European ancestry individuals, 5,982 African ancestry individuals, 7,313 South Asian ancestry individuals	22q13.31	22	43964121	PNPLA3, SAMM50	ENSG00000100344, ENSG00000100347	rs117826724-C	rs117826724	117826724	intron_variant	2e-15	14.699	0.0744	[0.056-0.093] unit increase	aspartate aminotransferase measurement	GCST90019497	Genome-wide genotyping array
36921087	Zhou YH	Genetic Modifiers of Cystic Fibrosis Lung Disease Severity: Whole Genome Analysis of 7,840 Patients.	Lung disease severity in cystic fibrosis with pancreatic insufficiency	7,437 European ancestry individuals, 403 individuals	22q13.31	22	43957603	PNPLA3, SAMM50	ENSG00000100344, ENSG00000100347	rs549395716-?	rs549395716	549395716	intron_variant	6e-06	5.22185			lung disease severity measurement	GCST90271928	Genome-wide genotyping array, Genome-wide sequencing
38365752	Saez ME	Genome-wide association study and polygenic risk scores of retinal thickness across the cognitive continuum: data from the NORFACE cohort.	Retinal nerve fibre layer (RNFL) thickness	3,170 European ancestry individuals	22q13.31	22	44000046	PARVB, SAMM50	ENSG00000188677, ENSG00000100347	rs142780018-?	rs142780018	142780018	intergenic_variant	8e-06	5.09691	4.1766	unit increase	retinal nerve fibre layer thickness	GCST90554824	Genome-wide genotyping array
36974753	Dong X	Unprocessed Red Meat and Processed Meat Consumption, Plasma Metabolome, and Risk of Ischemic Heart Disease: A Prospective Cohort Study of UK Biobank.	Processed meat related metabolomic signature	87,678 European ancestry individuals, 4,568 individuals	22q13.31	22	43962014	PNPLA3, SAMM50	ENSG00000100344, ENSG00000100347	rs56219234-T	rs56219234	56219234	intron_variant	5e-09	8.30103	0.03009	unit decrease	metabolite measurement, diet measurement	GCST90277237	Genome-wide genotyping array
36513072	Park J	Exome-wide association analysis of CT imaging-derived hepatic fat in a medical biobank.	Maximum measurement of hepatic fat	7,096 European ancestry individuals	22q13.31	22	43999571	PARVB, SAMM50	ENSG00000188677, ENSG00000100347	rs1007863-?	rs1007863	1007863	intergenic_variant	7e-14	13.1549	1.202	[0.89-1.52] unit increase	liver fat measurement	GCST90255380	Exome-wide sequencing
36513072	Park J	Exome-wide association analysis of CT imaging-derived hepatic fat in a medical biobank.	Median measurement of hepatic fat	7,096 European ancestry individuals	22q13.31	22	43999571	PARVB, SAMM50	ENSG00000188677, ENSG00000100347	rs1007863-?	rs1007863	1007863	intergenic_variant	1e-13	13	1.034	[0.76-1.31] unit increase	liver fat measurement	GCST90255381	Exome-wide sequencing
36513072	Park J	Exome-wide association analysis of CT imaging-derived hepatic fat in a medical biobank.	Minimum measurement of hepatic fat	7,096 European ancestry individuals	22q13.31	22	43999571	PARVB, SAMM50	ENSG00000188677, ENSG00000100347	rs1007863-?	rs1007863	1007863	intergenic_variant	1e-08	8	0.845	[0.55-1.14] unit increase	liver fat measurement	GCST90255382	Exome-wide sequencing
36513072	Park J	Exome-wide association analysis of CT imaging-derived hepatic fat in a medical biobank.	Maximum measurement of hepatic fat	2,814 African ancestry individuals, 7,096 European ancestry individuals, 113 Hispanic or Latin American individuals, 103 East Asian ancestry individuals, 84 South Asian ancestry individuals	22q13.31	22	43999571	PARVB, SAMM50	ENSG00000188677, ENSG00000100347	rs1007863-?	rs1007863	1007863	intergenic_variant	4e-12	11.3979	0.927	[0.67-1.19] unit increase	liver fat measurement	GCST90255386	Exome-wide sequencing
36513072	Park J	Exome-wide association analysis of CT imaging-derived hepatic fat in a medical biobank.	Median measurement of hepatic fat	2,814 African ancestry individuals, 7,096 European ancestry individuals, 113 Hispanic or Latin American individuals, 103 East Asian ancestry individuals, 84 South Asian ancestry individuals	22q13.31	22	43999571	PARVB, SAMM50	ENSG00000188677, ENSG00000100347	rs1007863-?	rs1007863	1007863	intergenic_variant	7e-12	11.1549	0.785	[0.56-1.01] unit increase	liver fat measurement	GCST90255387	Exome-wide sequencing
36513072	Park J	Exome-wide association analysis of CT imaging-derived hepatic fat in a medical biobank.	Minimum measurement of hepatic fat	2,814 African ancestry individuals, 7,096 European ancestry individuals, 113 Hispanic or Latin American individuals, 103 East Asian ancestry individuals, 84 South Asian ancestry individuals	22q13.31	22	43999571	PARVB, SAMM50	ENSG00000188677, ENSG00000100347	rs1007863-?	rs1007863	1007863	intergenic_variant	3e-08	7.52288	0.677	[0.44-0.92] unit increase	liver fat measurement	GCST90255388	Exome-wide sequencing
