# Supplementary material for: Nutrient State, Aging, and Diet Modulate SAM50-Dependent Mitochondrial Remodeling and Systemic Metabolic Signatures
Source: Research Square preprint supplement (doi:10.21203/rs.3.rs-8704245/v1), 2026-02-16
Supplement: Supplementary file 6 [file fb88d85edc0118dc1512bf80.xlsx]

## Sheet: LabWAS_AfricanAncestry
Supplemental File 4: LabWAS results for SAMM50 GREX in BioVU individuals of African ancestry
Laboratory Name	Laboratory Label	Laboratory Group	p-value	n_samples	Bonferroni Significant
Eosinophils/100 leukocytes in Cerebral spinal fluid by Manual count	CEosin	blood	0.000967425	245	FALSE
Complement C3 [Mass/volume] in Serum or Plasma	CH50	immune	0.00107521	85	FALSE
Phosphate	Phos	metabolic	0.00291356	3471	FALSE
Protein [Mass/volume] in Cerebral spinal fluid	CProt1	metabolic	0.00384966	720	FALSE
Monocytes/100 leukocytes in Blood by Automated count	MONORE	immune	0.00417047	11371	FALSE
Ornithine [Moles/volume] in Serum or Plasma	Ornthn	metabolic	0.00917422	76	FALSE
Calcium serum/plasma serum/plasma	Ca	metabolic	0.00937428	13541	FALSE
Alpha 1 antitrypsin [Mass/volume] in Serum or Plasma	A.1.A	other	0.0114975	76	FALSE
QRS duration	QRS.DURATION	cardiovascular	0.0140843	1595	FALSE
Thyroglobulin [Mass/volume] in Serum or Plasma	Thyrgb	endocrine	0.0198193	166	FALSE
Alpha-1-fetoprotein.tumor marker [Mass/volume] in Serum or Plasma	AFPTum	cancer	0.024921	447	FALSE
Creatinine [Mass/time] in 24 hour Urine	Cr24Hr	kidney	0.0253866	278	FALSE
Lipemic index of Serum or Plasma	LipIdx	metabolic	0.0268952	733	FALSE
Q ONSET	Q.ONSET	cardiovascular	0.0273978	1595	FALSE
Dimer	Dimer	blood	0.0295782	307	FALSE
Calcitriol [Mass/volume] in Serum or Plasma	D25OHT	metabolic	0.0322411	3832	FALSE
Neutrophils/100 leukocytes in Cerebral spinal fluid by Manual count	CNeut	immune	0.0333245	437	FALSE
Calcidiol [Mass/volume] in Serum or Plasma	X25HyD3	metabolic	0.0432132	1310	FALSE
Monocytes [#/volume] in Blood by Manual count	Monocy	immune	0.0483628	5033	FALSE
lev	lev	other	0.0495941	68	FALSE
VWFAg	VWFAg	other	0.051355	78	FALSE
Sirolimus [Mass/volume] in Blood	Sirol	toxicology/pharmacology	0.0521118	59	FALSE
Eos	Eos	immune	0.0565909	4923	FALSE
Erythrocyte distribution width [Ratio] by Automated count Erythrocyte distribution width [Ratio] by Automated count	RDW	blood	0.0570934	14680	FALSE
Free PSA serum/plasma	PSA.Fr	cancer	0.0587745	80	FALSE
Complement C1 esterase inhibitor [Mass/volume] in Serum or Plasma	C1Elh	immune	0.0595458	52	FALSE
Calcitriol [Mass/volume] in Serum or Plasma	VD25	metabolic	0.0599565	360	FALSE
Basophils/100 leukocytes in Cerebral spinal fluid by Manual count	CBaso	immune	0.0668418	207	FALSE
Sucrase [Enzymatic activity/mass] in Tissue	ScrasT	metabolic	0.0736947	63	FALSE
FRONTAL AXIS INITIAL 40 MS	FRONTAL.AXIS.INITIAL.40.MS	cardiovascular	0.0751618	1588	FALSE
Prolactin [Mass/volume] in Serum or Plasma	Prolac	endocrine	0.0765816	775	FALSE
Asparagine [Moles/volume] in Serum or Plasma	Asprgn	metabolic	0.0797109	75	FALSE
TTcont	TTcont	other	0.0876151	55	FALSE
Urea nitrogen serum/plasma	BUN	metabolic	0.0961745	13631	FALSE
Valproate serum/plasma	Depaka	toxicology/pharmacology	0.0995375	220	FALSE
RePRA	RePRA	toxicology/pharmacology	0.100896	69	FALSE
25-Hydroxyvitamin D2+25-Hydroxyvitamin D3 [Mass/volume] in Serum or Plasma	X25DTot	metabolic	0.101521	1297	FALSE
Isomaltase [Enzymatic activity/mass] in Tissue	MaltsT	metabolic	0.103297	63	FALSE
EoAbs	EoAbs	immune	0.110021	4813	FALSE
Blasts/100 leukocytes in Blood by Manual count	Blasts	blood	0.110179	268	FALSE
Glucose [Mass/volume] in Serum or Plasma --3 hours post 100 g glucose PO	GTT3Hr	metabolic	0.113805	228	FALSE
56+16%	X56.16.	other	0.119743	403	FALSE
IgG [Mass/volume] in Serum or Plasma	IgG.Q	immune	0.120702	587	FALSE
Hm	Hm	other	0.131715	643	FALSE
Unidentified cells/100 leukocytes in Body fluid	CLgOth	immune	0.13717	191	FALSE
QRS axis	HORIZONTAL.AXIS..TERMINAL.40.MS	cardiovascular	0.146836	1557	FALSE
Phenylalanine [Moles/volume] in Serum or Plasma	Phnyln	metabolic	0.149167	76	FALSE
Vancomycin [Mass/volume] in Serum or Plasma	Vanco1	toxicology/pharmacology	0.149278	1370	FALSE
Cells Counted Total [#] in Body fluid	FTo.Cl	blood	0.150483	470	FALSE
Basophils/100 leukocytes in Body fluid by Manual count	FBaso	immune	0.151114	153	FALSE
DHUD	DHUD	metabolic	0.16071	111	FALSE
Cholesterol.total/Cholesterol in HDL [Molar ratio] in Serum or Plasma	TC.HDL	metabolic	0.161214	460	FALSE
Eosinophils [#/volume] in Blood by Automated count	EOSIA	immune	0.171557	8052	FALSE
Fibrinogen [Mass/volume] in Platelet poor plasma by Coagulation assay	Fbrngn	blood	0.179815	1140	FALSE
FRONTAL AXIS TERMINAL 40 MS	FRONTAL.AXIS.TERMINAL.40.MS	cardiovascular	0.18678	1585	FALSE
INTERNATIONAL NORMALIZATION RATIO	INTERNATIONAL.NORMALIZATION.RATIO	blood	0.187752	67	FALSE
Mononuclear cells/100 leukocytes in Synovial fluid by Manual count	SyMnCl	immune	0.190383	263	FALSE
Eosinophils [#/volume] in Blood by Automated count	EOSIAB	immune	0.193625	6776	FALSE
CPK	CPK	cardiovascular	0.197056	2988	FALSE
Glutamate [Moles/volume] in Serum or Plasma	GlutAc	metabolic	0.202092	77	FALSE
Blasts/100 leukocytes in Body fluid by Manual count	FBlsts	immune	0.203346	113	FALSE
Cholesterol in HDL [Mass/volume] in Serum or Plasma	HDL.C	metabolic	0.203865	6839	FALSE
P wave Atrium by EKG	ATRIAL.RATE	cardiovascular	0.207283	1596	FALSE
DNA double strand Ab [Units/volume] in Serum	AntDNA	immune	0.208673	559	FALSE
Protein C inhibitor [Mass/volume] in Platelet poor plasma by Immunoassay	Leiden	blood	0.211288	271	FALSE
Leukocytes [#/volume] in Blood by Automated count	I.WBC	immune	0.220352	552	FALSE
IgG clearance/Albumin clearance [Ratio] in Serum and CSF	G.Indx	immune	0.222649	108	FALSE
Gest	Gest	ob/gyn	0.223994	434	FALSE
Calcium.ionized [Mass/volume] in Blood	CaIo	metabolic	0.224192	2883	FALSE
Platelets reticulated/100 platelets in Blood by Automated count	IPF	blood	0.233773	1382	FALSE
Creatinine [Mass/volume] in Blood	WBCrt	blood	0.237285	1321	FALSE
Thyroxine (T4) free [Mass/volume] in Serum or Plasma	FT4	endocrine	0.242688	5575	FALSE
pH of Urine by Test strip	UpH	urinary	0.247186	9541	FALSE
Retinol [Mass/volume] in Serum or Plasma	ViARet	metabolic	0.255803	367	FALSE
Hemoglobin [Entitic mass] in Reticulocytes	RETHE	blood	0.256402	1363	FALSE
Cholesterol non HDL [Mass/volume] in Serum or Plasma	NonHDL	metabolic	0.256949	421	FALSE
Complement C3 [Mass/volume] in Serum or Plasma	C3	immune	0.263607	946	FALSE
Leukocytes [#/volume] in Blood by Automated count	LucAbs	blood	0.267678	792	FALSE
Lactate [Moles/volume] in Serum or Plasma	LA	metabolic	0.267856	2187	FALSE
Plasma cells/100 leukocytes in Body fluid	FPlaCl	blood	0.269544	113	FALSE
Magnesium [Mass/volume] in Serum or Plasma	Mg	metabolic	0.274493	3582	FALSE
Calcitriol [Mass/volume] in Serum or Plasma	X125DHy	metabolic	0.277822	455	FALSE
QRS axis	HORIZONTAL.AXIS..INITIAL.40.MS	cardiovascular	0.279113	1572	FALSE
Basophils/100 leukocytes in Blood by Automated count	BASORE	immune	0.285603	11361	FALSE
Complement C4 [Mass/volume] in Serum or Plasma	C4Quan	immune	0.286254	953	FALSE
Creatinine [Mass/volume] in Urine	BUN_CREATININE_RATIO	metabolic	0.292397	123	FALSE
Lysine [Moles/volume] in Serum or Plasma	Lysine	metabolic	0.292517	75	FALSE
Potassium [Moles/volume] in Urine	SU.K	urinary	0.301125	143	FALSE
Cancer Ag 19-9 [Units/volume] in Serum or Plasma	CA19.9	cancer	0.302212	96	FALSE
Eosinophils %	EOSIRE	immune	0.308037	6803	FALSE
ST segment axis.horizontal plane	FRONTAL.AXIS.ST	cardiovascular	0.310804	1588	FALSE
Monocytes/100 leukocytes in Blood by Manual count	MONOM	immune	0.316847	2331	FALSE
Creatine kinase.MB [Mass/volume] in Serum or Plasma	CKMBRe	cardiovascular	0.32631	2471	FALSE
Creatinine [Mass/volume] in Urine	SUCrea	urinary	0.327666	2522	FALSE
Eosinophils/100 leukocytes in Blood by Automated count	EOSIM	immune	0.329691	8514	FALSE
NtAbs	NtAbs	immune	0.331973	4927	FALSE
dRVVT actual/normal (normalized LA screen)	RVVT	immune	0.342201	526	FALSE
Amylase [Enzymatic activity/volume] in Serum or Plasma	Amyl	metabolic	0.349148	1744	FALSE
QRS axis.horizontal plane Reference beat	QRS.HORIZONTAL.AXIS	cardiovascular	0.349699	1578	FALSE
Cholesterol in LDL [Mass/volume] in Serum or Plasma by calculation	LDLCho	metabolic	0.351349	59	FALSE
MCHC [Mass/volume] by Automated count	MCHC	blood	0.357358	11042	FALSE
Albumin [Presence] in Urine	AlbCnc	urinary	0.357738	1517	FALSE
Anion gap serum/plasma	AN.GAP	metabolic	0.36308	13601	FALSE
Erythrocyte sedimentation rate by Westergren method	SedRat	blood	0.364	2258	FALSE
Immature reticulocytes/Reticulocytes.total in Blood	IRF	blood	0.367444	1612	FALSE
CD3+CD4+ (T4 helper) cells/100 cells in Blood	CD4_percent_	immune	0.367795	916	FALSE
Vancomycin [Mass/volume] in Serum or Plasma	VancTr	toxicology/pharmacology	0.378818	171	FALSE
Ferritin [Mass/volume] in Serum or Plasma	Ferrit	blood	0.388468	3772	FALSE
Monocytes+Macrophages/100 leukocytes in Cerebral spinal fluid by Manual count	CMonMc	immune	0.388563	518	FALSE
IgM [Mass/volume] in Serum or Plasma	IgM.Q	immune	0.392351	323	FALSE
Leukocytes [#/volume] in Blood by Automated count	WBC	immune	0.394456	14675	FALSE
UNBOUND_IRON_BINDING	UNBOUND_IRON_BINDING	metabolic	0.39837	122	FALSE
Tyrosine [Moles/volume] in Serum or Plasma	Tyrosn	metabolic	0.398608	76	FALSE
Triiodothyronine (T3) Free [Mass/volume] in Serum or Plasma	T3FRE	endocrine	0.409664	193	FALSE
Troponin T.cardiac [Mass/volume] in Serum or Plasma	TropnT	cardiovascular	0.412736	284	FALSE
Tryptophan [Moles/volume] in Serum or Plasma	Tryphn	metabolic	0.413331	76	FALSE
Lymphocytes [#/volume] in Blood by Automated count	LymAbs	immune	0.416599	4930	FALSE
Carbamazepine serum/plasma	Tegret	toxicology/pharmacology	0.417732	70	FALSE
Serine [Moles/volume] in Serum or Plasma	Serine	metabolic	0.418107	75	FALSE
Borrelia burgdorferi Ab [Units/volume] in Serum by Immunoassay	BBTAb	toxicology/pharmacology	0.427935	118	FALSE
Thyroxine (T4) [Mass/volume] in Serum or Plasma	TT4	endocrine	0.428889	603	FALSE
Neutrophils/100 leukocytes in Blood by Automated count	NEUTRE	immune	0.43015	11377	FALSE
Glucose [Mass/volume] in Serum or Plasma --2 hours post 100 g glucose PO	GTT2Hr	metabolic	0.433272	268	FALSE
Cobalamin (Vitamin B12) [Mass/volume] in Serum or Plasma	Vi.B12	metabolic	0.435721	3489	FALSE
Granular casts [#/area] in Urine sediment by Microscopy high power field	UGrCst	urinary	0.436341	212	FALSE
P-S-Ac	P.S.Ac	blood	0.440682	276	FALSE
Nucleated erythrocytes [#/volume] in Blood by Automated count	NRBCMA	blood	0.442512	451	FALSE
Erythrocyte distribution width [Entitic volume] by Automated count	RDWSD	blood	0.44575	13592	FALSE
Oxygen saturation Calculated from oxygen partial pressure in Arterial blood	O2Sat	blood	0.450986	1678	FALSE
Proline [Moles/volume] in Serum or Plasma	Prolne	metabolic	0.453562	75	FALSE
Basophils/100 leukocytes in Blood by Manual count	BASOM	immune	0.455031	1669	FALSE
Haptoglobin [Mass/volume] in Serum or Plasma	Haptgl	blood	0.464576	603	FALSE
Normetanephrine [Mass/time] in 24 hour Urine	NormeU	urinary	0.466721	67	FALSE
Lymphocytes/100 leukocytes in Blood by Automated count	LYMPRE	immune	0.476041	11365	FALSE
Triglyceride [Mass/volume] in Serum or Plasma	Trigs	metabolic	0.47813	6995	FALSE
Troponin I.cardiac [Mass/volume] in Blood	WBTrpI	cardiovascular	0.479696	552	FALSE
Beta-2-Microglobulin [Mass/volume] in Serum or Plasma	B2Mcg	immune	0.487004	77	FALSE
Vancomycin [Susceptibility] by Minimum inhibitory concentration (MIC)	Vancomy	toxicology/pharmacology	0.488833	435	FALSE
Basophils [#/volume] in Blood	Baso	immune	0.490298	4864	FALSE
Iron [Mass/volume] in Serum or Plasma	Iron	blood	0.491962	3500	FALSE
Hemoglobin A2/Hemoglobin.total in Blood	HPLCA2	blood	0.493248	1420	FALSE
56+16#	X56.16_percent_	immune	0.495275	417	FALSE
sn	sn	other	0.498612	646	FALSE
Smith extractable nuclear Ab [Units/volume] in Serum by Immunoassay	SMAb	immune	0.50188	165	FALSE
Creatine kinase.MB/Creatine kinase.total in Serum or Plasma	MBRat	cardiovascular	0.504565	2432	FALSE
Myelocytes/100 leukocytes in Blood by Manual count	Myelo	immune	0.508458	1318	FALSE
Ammonia [Moles/volume] in Plasma	Amm	metabolic	0.510951	554	FALSE
IMMATURE_GRANULOCYTES	IMMATURE_GRANULOCYTES	immune	0.515395	85	FALSE
Sodium [Moles/volume] in Urine	SU.Na	urinary	0.515951	643	FALSE
sz	sz	other	0.522225	74	FALSE
Glucose [Mass/volume] in Blood by Automated test strip	GluBed	metabolic	0.522647	5300	FALSE
Creatinine [Mass/volume] in Blood Creatinine [Mass/volume] in Blood	Creat	kidney	0.525573	13653	FALSE
Tissue transglutaminase IgA Ab [Units/volume] in Serum by Immunoassay	TTAIgA	immune	0.529961	157	FALSE
Follitropin [Units/volume] in Serum or Plasma	FSH1	endocrine	0.530578	778	FALSE
Tau protein [Presence] in Body fluid	TProt	blood	0.537792	7911	FALSE
Leukocytes [#/area] in Urine sediment by Microscopy high power field	UWBC	urinary	0.54716	6518	FALSE
Pyridoxine [Mass/volume] in Serum or Plasma	VitaB6	metabolic	0.548626	381	FALSE
Cholesterol in LDL [Mass/volume] in Serum or Plasma by calculation	LDL.C	metabolic	0.554179	6700	FALSE
Mononuclear cells [#/volume] in Body fluid by Manual count	FMonMc	immune	0.55481	268	FALSE
INR	PT.inr	blood	0.561663	6699	FALSE
Quant_TB2(-)NIL	Quant_TB2...NIL	immune	0.56772	114	FALSE
Cholesterol in LDL [Mass/volume] in Serum or Plasma by Direct assay	DirLDL	metabolic	0.56867	869	FALSE
TstPBy	TstPBy	endocrine	0.569531	3098	FALSE
C reactive protein [Mass/volume] in Serum or Plasma	CRP	immune	0.570821	4025	FALSE
Nucleated erythrocytes/100 leukocytes [Ratio] in Cerebral spinal fluid by Manual count	NRBCBC	blood	0.572188	585	FALSE
Lutropin [Units/volume] in Serum or Plasma	LH1	endocrine	0.572274	449	FALSE
Carboxyhemoglobin % in blood	CoHgb	toxicology/pharmacology	0.575314	1239	FALSE
SomatC	SomatC	endocrine	0.580694	127	FALSE
Urea nitrogen [Mass/volume] in Urine	SU.Ure	urinary	0.594468	559	FALSE
Lymphocytes/100 leukocytes in Blood by Manual count	LYMPM	immune	0.595675	2371	FALSE
Basophils [#/volume] in Blood by Automated count	BAbs	immune	0.601131	4782	FALSE
Erythrocytes [#/area] in Urine sediment by Microscopy high power field	URBC	urinary	0.602398	6082	FALSE
Metanephrine/Creatinine [Mass Ratio] in 24 hour Urine	N.M_Cr	urinary	0.603835	66	FALSE
pH of Arterial blood	pH	kidney	0.606754	2814	FALSE
Creatine kinase [Enzymatic activity/volume] in Serum or Plasma	CPKTot	cardiovascular	0.613449	1719	FALSE
Urobilinogen [Units/volume] in Urine by Test strip	UrobUr	urinary	0.614071	970	FALSE
Eosinophils/100 leukocytes in Body fluid by Manual count	FEosin	immune	0.618131	253	FALSE
Variant lymphocytes/100 leukocytes in Body fluid by Manual count	FATYP	blood	0.618925	198	FALSE
SCL-70 extractable nuclear Ab [Units/volume] in Serum by Immunoassay	SclAb	immune	0.619791	191	FALSE
Estriol (E3).unconjugated [Mass/volume] in Serum or Plasma	EstUn	endocrine	0.625666	506	FALSE
Protein C [Units/volume] in Platelet poor plasma by Chromogenic method	PCAct	blood	0.638094	285	FALSE
pH of Venous blood	pH.Ven	kidney	0.639257	2087	FALSE
T wave axis	T.WAVE.AXIS	cardiovascular	0.639604	1588	FALSE
Clot angle in Blood by Thromboelastography	ANGL	blood	0.639961	118	FALSE
Cholesterol [Mass/volume] in Serum or Plasma	Chol	metabolic	0.643983	7013	FALSE
Angiotensin converting enzyme [Enzymatic activity/volume] in Serum or Plasma	AngioC	cardiovascular	0.650347	227	FALSE
Fructosamine [Moles/volume] in Serum or Plasma	Fructo	metabolic	0.652151	128	FALSE
Leucine [Moles/volume] in Serum or Plasma	Leucne	metabolic	0.652763	76	FALSE
Neutrophils [#/volume] in Blood	Neut	immune	0.653821	5047	FALSE
BUN POST	BUN..POST	kidney	0.656751	55	FALSE
Parathyrin.intact [Mass/volume] in Serum or Plasma	Nt.PTH	endocrine	0.659134	1590	FALSE
Beta globulin [Mass/volume] in Serum or Plasma by Electrophoresis	BGL	immune	0.663445	88	FALSE
Microalbumin/Creatinine [Mass Ratio] in 24 hour Urine	AlbCre	liver	0.684627	1029	FALSE
Folate [Mass/volume] in Serum or Plasma	SerFol	metabolic	0.689494	1326	FALSE
Aldosterone [Mass/volume] in Serum or Plasma	Aldo.P	endocrine	0.690834	339	FALSE
Immature granulocytes/100 leukocytes in Blood	IGRE	immune	0.696294	11009	FALSE
Cardiolipin IgA Ab [Units/volume] in Serum by Immunoassay	ACAIgA	immune	0.696636	476	FALSE
Progesterone [Mass/volume] in Serum or Plasma	Prog.R	endocrine	0.697478	172	FALSE
aPTT in Platelet poor plasma by Coagulation assay	PTTCtr	blood	0.709031	3210	FALSE
GTT50g	GTT50g	metabolic	0.710681	1413	FALSE
Protein serum/plasma	TProSe	metabolic	0.714207	7291	FALSE
PP interval mean	PR.INTERVAL	cardiovascular	0.718669	1569	FALSE
Dehydroepiandrosterone sulfate (DHEA-S) [Mass/volume] in Serum or Plasma	DHEA.S	endocrine	0.72438	336	FALSE
Glucose urine dipstick	UGluc	urinary	0.726943	1121	FALSE
P wave axis	FRONTAL.AXIS.P	cardiovascular	0.727732	1561	FALSE
Reticulocytes/100 erythrocytes in Blood by Automated count	RetiCt	blood	0.729527	2004	FALSE
MonAbs	MonAbs	immune	0.733838	4930	FALSE
Polymorphonuclear cells/100 leukocytes in Body fluid by Manual count	NEUTM	immune	0.73448	2339	FALSE
Lymphocytes [#/volume] in Blood	Lym	immune	0.747173	5035	FALSE
Creatinine [Mass/time] in 24 hour Urine	CR.Day	kidney	0.750637	89	FALSE
IgE [Mass/volume] in Serum	IgEQnt	immune	0.751754	289	FALSE
Volume in Urine collected for unspecified duration	TotVl	toxicology/pharmacology	0.752096	1001	FALSE
Folate [Mass/volume] in Red Blood Cells	RBCFol	metabolic	0.756659	1064	FALSE
P wave axis horizontal plane Reference beat	P.HORIZONTAL.AXIS	cardiovascular	0.76181	1532	FALSE
Heparin unfractionated [Units/volume] in Platelet poor plasma by Chromogenic method	Hepasy	blood	0.766049	50	FALSE
Tacrolimus [Mass/volume] in Blood	FK.506	liver	0.775894	452	FALSE
IgA [Mass/volume] in Serum or Plasma	IgA	immune	0.77772	1083	FALSE
TCIcdt	TCIcdt	immune	0.778424	336	FALSE
UREA REDUCTION RATIO	UREA.REDUCTION.RATIO	urinary	0.78713	55	FALSE
Urate [Mass/volume] in Serum or Plasma	UricA	urinary	0.793831	2416	FALSE
Oxygen saturation Calculated from oxygen partial pressure in Venous blood	O2SatV	blood	0.79915	1711	FALSE
Trans-3-Hydroxycotinine [Mass/volume] in Serum or Plasma	X3OHCot	toxicology/pharmacology	0.80373	56	FALSE
HIV-hi	HIV.hi	immune	0.805192	133	FALSE
Ketones [Mass/volume] in Urine by Test strip	UKeto	urinary	0.809639	1683	FALSE
Bicarbonate [Moles/volume] in Unspecified specimen	HCO3Ca	metabolic	0.814163	2978	FALSE
Promyelocytes/100 leukocytes in Cerebral spinal fluid by Manual count	CPmylo	immune	0.81671	170	FALSE
Protein [Mass/volume] in Urine by Test strip	UrPro	urinary	0.82223	5234	FALSE
LEUKOREDUCED_RANDOM_PLATELETS	LEUKOREDUCED_RANDOM_PLATELETS	immune	0.822895	178	FALSE
Penicillin G [Susceptibility] by Minimum inhibitory concentration (MIC)	PenG	immune	0.827615	83	FALSE
Maximum clot firmness [Length] in Blood by Thromboelastography	MXAMP	other	0.830534	119	FALSE
Total Bilirubin serum/plasma	TBil	metabolic	0.831361	12078	FALSE
Ethanol [Mass/volume] in Serum or Plasma	ETOH	toxicology/pharmacology	0.83181	146	FALSE
HCVQNT	HCVQNT	immune	0.83526	188	FALSE
Plasma cells/100 leukocytes in Cerebral spinal fluid by Manual count	CPlaCl	blood	0.839524	169	FALSE
Troponin I.cardiac [Mass/volume] in Serum or Plasma	TRPI	cardiovascular	0.839627	2064	FALSE
HEMOGLOBIN	HEMOGLOBIN	blood	0.842175	134	FALSE
Glucose [Mass/volume] in Blood	GluWB	blood	0.851313	2380	FALSE
Testosterone Free [Mass/volume] in Serum or Plasma	TestFr	endocrine	0.855788	281	FALSE
Natriuretic peptide B [Mass/volume] in Serum or Plasma	BNP	cardiovascular	0.858906	2271	FALSE
Beta+gamma tocopherol [Mass/volume] in Serum or Plasma	VitEGm	metabolic	0.862231	108	FALSE
Erythrocytes [#/volume] in Blood by Automated count	FRBC1	blood	0.867573	271	FALSE
Cortisol [Mass/volume] in Serum or Plasma	Cort.S	endocrine	0.868137	888	FALSE
HEMATOCRIT	HEMATOCRIT	blood	0.869298	134	FALSE
Prealbumin [Mass/volume] in Serum or Plasma	Pralbu	metabolic	0.876743	1152	FALSE
Creatinine [Mass/volume] in 24 hour Urine	SU.Cre	endocrine	0.880304	177	FALSE
Blasts/100 leukocytes in Cerebral spinal fluid by Manual count	CBlsts	blood	0.882353	171	FALSE
Specific gravity of Urine by Test strip	USpGr	urinary	0.883138	9529	FALSE
MCV [Entitic volume] by Automated count	MCV	blood	0.88602	14663	FALSE
Phenytoin serum/plasma	Ptn	toxicology/pharmacology	0.887728	181	FALSE
Coagulation factor VIII activity actual/normal in Platelet poor plasma by Coagulation assay	F8Act	blood	0.888193	240	FALSE
Testosterone Free [Mass/volume] in Serum or Plasma	TstFAM	cancer	0.911818	88	FALSE
Carbon dioxide serum/plasma	CO2	blood	0.913132	13629	FALSE
Malignant cells/100 cells in Body fluid by Manual count	FMALN	cancer	0.913284	55	FALSE
Glucose lab	Gluc	metabolic	0.914316	13661	FALSE
Osmolality of Serum or Plasma	Osmol	blood	0.923099	317	FALSE
Hemoglobin A1c (Glycated) Hemoglobin A1c (Glycated)	HgbA1C	metabolic	0.923571	5900	FALSE
Creatinine [Mass/volume] in Urine	Creat1	kidney	0.924298	115	FALSE
Helicobacter pylori Ab [Units/volume] in Serum by Immunoassay	HPylAE	immune	0.924928	158	FALSE
Transferrin [Mass/volume] in Serum or Plasma	Trnsfr	metabolic	0.926925	480	FALSE
Cardiolipin IgM Ab [Units/volume] in Serum by Immunoassay	ACAIgM	immune	0.930204	594	FALSE
Hematocrit	HCTWB	blood	0.930469	2154	FALSE
Platelet mean volume [Entitic volume] in Blood by Automated count Platelet mean volume [Entitic volume] in Blood by Automated count	MPV	blood	0.930887	11701	FALSE
Icteric index of Serum or Plasma	IctIdx	metabolic	0.93089	728	FALSE
Gamma interferon background [Units/volume] in Blood by Immunoassay	QtfNIL	immune	0.932499	744	FALSE
Collection duration of Unspecified specimen	HrColl	urinary	0.9361	223	FALSE
25-Hydroxycalciferol [Mass/volume] in Serum or Plasma	X25HyD2	metabolic	0.938267	581	FALSE
Hydroxyproline [Moles/volume] in Serum or Plasma	OHPrln	metabolic	0.938491	75	FALSE
Hemoglobin A1c (Glycated)	POCA1C	blood	0.940611	775	FALSE
Schd	Schd	toxicology/pharmacology	0.941683	750	FALSE
MCH [Entitic mass] by Automated count	MCH	blood	0.948779	14671	FALSE
Erythrocytes [#/volume] in Blood by Automated count	RBC	blood	0.950418	229	FALSE
T wave axis.horizontal plane Reference beat	T.HORIZONTAL.AXIS	cardiovascular	0.973056	1571	FALSE
Gentamicin [Mass/volume] in Serum or Plasma	Genta	toxicology/pharmacology	0.974755	200	FALSE
Chloride [Moles/volume] in Blood	Cl.WB	blood	0.980968	1314	FALSE
Alpha 1 antitrypsin [Mass/volume] in Serum or Plasma	A1Anti	other	0.986262	145	FALSE
PSA serum/plasma	PSA	cancer	0.989278	1182	FALSE
Unidentified cells/100 leukocytes in Body fluid	FLgOth	blood	0.991519	125	FALSE
Bilirubin.conjugated [Mass/volume] in Serum or Plasma	CBil	liver	0.99239	4848	FALSE
Corticotropin [Mass/volume] in Plasma	ACTH	endocrine	0.992656	214	FALSE
Hepatitis B virus surface Ab [Presence] in Serum	HBSA.	liver	0.999044	1362	FALSE
